# Supplementary material for: Zn(OTf)2-catalyzed intra- and intermolecular selenofunctionalization of alkenes under mild conditions
Source: Royal Society of Chemistry journal article supplement (doi:10.1039/d4ra04266b), 2024-01-01

*Supporting Information*

**Zn(OTf)<sub>2</sub>-Catalyzed Intra- and Intermolecular  
Selenofunctionalization of Alkenes under Mild Conditions**

Cong Qi,<sup>a</sup> Zhaogong Lu,<sup>a</sup> Yuyang Gu,<sup>b</sup> Xiaofeng Bao,<sup>a</sup> Biao Xiong<sup>a</sup> and Gong-Qing  
Liu<sup>a\*</sup>

<sup>a</sup> *School of Pharmacy and Nantong Key Laboratory of Small Molecular Drug Innovation,  
Nantong University, Nantong, 226019, People's Republic of China. E-mail:  
gqliu@ntu.edu.cn*

<sup>b</sup> *School of Medicine, Nantong University, Nantong 226019, People's Republic of China.*

E-mail: [gqliu@ntu.edu.cn](mailto:gqliu@ntu.edu.cn)

**Content**

|                                                            |     |
|------------------------------------------------------------|-----|
| 1. General information .....                               | S2  |
| 2. General procedure for the selenofunctionalization ..... | S2  |
| 3. Characterization data .....                             | S2  |
| 4. References .....                                        | S17 |
| 5. Copies of NMR spectra.....                              | S17 |

## 1. General information

### Solvents and reagents

Reagents were used as received without further purification unless otherwise indicated. Solvents were dried and distilled prior to use. Petroleum ether used had a boiling point range of 60–90°C.

### Chromatography

Chromatographic purification of products was performed as flash column chromatography on silica gel (200–300 meshes). Thin-layer chromatography (TLC) was carried out on silica plates (TLC Silica GF<sub>254</sub>). Visualization of the compounds was accomplished by projecting UV-light onto the developed plates.

### Instrumentations

- NMR spectra were recorded on a Bruker Avance- III HD (<sup>1</sup>H NMR: 400 MHz, <sup>13</sup>C NMR: 100 MHz) spectrometer. Chemical shifts are referenced to residual solvent signals (CDCl<sub>3</sub>: 7.26 ppm and 77.16 ppm for <sup>1</sup>H NMR and <sup>13</sup>C NMR respectively) and reported in parts per million (ppm) relative to tetramethylsilane (TMS). Spin–spin coupling constants (*J*) were given in Hz. Multiplicities of NMR signals are abbreviated as follows: br = broad, s = singlet, d = doublet, t = triplet, q = quartet, m = multiplet.
- High resolution mass spectrometry (HRMS) analyses were carried out on a Thermo Fisher Q Exactive Mass Spectrometer.
- Melting points were determined on glass slides using a WRX-4 digital display microscopic melting point apparatus and were presented uncorrected.

## 2. General procedure for the selenofunctionalization

The reaction was carried out in an open air system. To a 20 mL test tube with magnetic stir bar were added 0.2 mmol alkene, 0.2 mmol nucleophile, 0.01 mmol Zn(OTf)<sub>2</sub> and 2 mL of CH<sub>2</sub>Cl<sub>2</sub>. The reaction mixture was stirred at room temperature for 5 hours. Then, the solvent was removed with a rotary evaporator. The pure product was obtained by flash chromatography on silica gel using petroleum ether and ethyl acetate as the eluent.

## 3. Characterization data

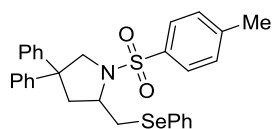

**4,4-Diphenyl-2-((phenylselenanyl)methyl)-1-tosylpyrrolidine (3a).** Compound **3a** was prepared according to the general procedure and isolated as an oil (93 mg, 85% yield) after flash chromatography (petroleum ether/ethyl acetate=15/1).

<sup>1</sup>H NMR (400 MHz, CDCl<sub>3</sub>): δ 7.49 – 7.42 (m, 2H), 7.28 – 7.20 (m, 5H), 7.19 – 7.12 (m, 4H), 7.09 – 6.91 (m, 8H), 4.40 (d, *J* = 10.1 Hz, 1H), 3.65 – 3.57 (m, 1H), 3.54 (dd, *J* = 12.5, 2.9 Hz, 1H), 3.41 (d, *J* = 10.2 Hz, 1H), 2.64 – 2.50 (m, 2H), 2.24 (s, 3H), 2.23 – 2.19 (m, 1H).

$^{13}\text{C}\{^1\text{H}\}$  NMR (100 MHz,  $\text{CDCl}_3$ ):  $\delta$  143.9, 143.8, 142.3, 132.0, 128.5, 128.2, 127.8, 127.6, 127.5, 127.4, 126.4, 126.1, 125.7, 125.5, 125.35, 125.30, 58.4, 57.8, 51.0, 41.5, 31.4, 20.4.

Spectral data are in agreement with literature values<sup>[1]</sup>.

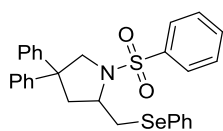

**4,4-Diphenyl-2-((phenylselanyl)methyl)-1-(phenylsulfonyl)pyrrolidine (3b)**. Compound **3b** was prepared according to the general procedure and isolated as a white solid (85 mg, 80% yield) after flash chromatography (petroleum ether/ethyl acetate=20/1).

mp=127-129 °C.

$^1\text{H}$  NMR (400 MHz,  $\text{CDCl}_3$ ):  $\delta$  7.49 – 7.43 (m, 2H), 7.42 – 7.35 (m, 3H), 7.28 – 7.22 (m, 5H), 7.20 – 7.15 (m, 4H), 7.12 – 7.00 (m, 4H), 6.98 – 6.93 (m, 2H), 4.41 (d,  $J$  = 10.2 Hz, 1H), 3.67 – 3.58 (m, 1H), 3.54 (dd,  $J$  = 12.5, 2.9 Hz, 1H), 3.45 (d,  $J$  = 10.2 Hz, 1H), 2.64 – 2.54 (m, 2H), 2.29 – 2.19 (m, 1H).

$^{13}\text{C}\{^1\text{H}\}$  NMR (100 MHz,  $\text{CDCl}_3$ ):  $\delta$  143.8, 143.7, 135.2, 132.1, 131.6, 128.2, 127.9, 127.6, 127.5, 126.4, 126.1, 125.7, 125.6, 125.56, 125.50, 125.3, 58.5, 57.7, 51.0, 41.5, 31.4.

Spectral data are in agreement with literature values<sup>[1]</sup>.

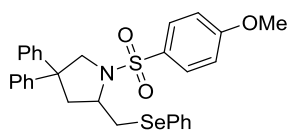

**1-((4-Methoxyphenyl)sulfonyl)-4,4-diphenyl-2-((phenylselanyl)methyl)pyrrolidine (3c)**. Compound **3c** was prepared according to the general procedure and isolated as a white solid (88 mg, 78% yield) after flash chromatography

(petroleum ether/ethyl acetate=10/1). mp=115-116 °C.

$^1\text{H}$  NMR (400 MHz,  $\text{CDCl}_3$ ): 7.52 – 7.43 (m, 2H), 7.31 (d,  $J$  = 8.9 Hz, 2H), 7.23 (dd,  $J$  = 5.0, 1.8 Hz, 3H), 7.20 – 7.14 (m, 4H), 7.12 – 6.89 (m, 6H), 6.66 (d,  $J$  = 8.9 Hz, 2H), 4.41 (d,  $J$  = 10.1 Hz, 1H), 3.72 (s, 3H), 3.65 – 3.49 (m, 2H), 3.40 (d,  $J$  = 10.1 Hz, 1H), 2.74 – 2.47 (m, 2H), 2.23 (dd,  $J$  = 12.5, 11.1 Hz, 1H).

$^{13}\text{C}\{^1\text{H}\}$  NMR (100 MHz,  $\text{CDCl}_3$ ):  $\delta$  161.7, 143.9, 143.8, 132.0, 128.5, 128.2, 127.8, 127.6, 127.5, 126.7, 126.1, 125.7, 125.5, 125.4, 125.3, 113.1, 58.4, 57.8, 54.5, 51.08, 41.5, 31.5.

Spectral data are in agreement with literature values<sup>[1]</sup>.

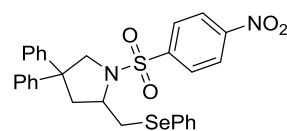

**1-((4-Nitrophenyl)sulfonyl)-4,4-diphenyl-2-((phenylselanyl)methyl)pyrrolidine (3d)**. Compound **3d** was prepared according to the general procedure and isolated as a yellow solid (76mg, 66% yield) after flash chromatography

(petroleum ether/ethyl acetate=15/1). mp=166-168 °C.

$^1\text{H}$  NMR (400 MHz,  $\text{CDCl}_3$ ):  $\delta$  7.50 – 7.43 (m, 2H), 7.43 – 7.34 (m, 3H), 7.30 – 7.15 (m, 9H), 7.12 – 6.99 (m, 4H), 6.99 – 6.89 (m, 2H), 4.41 (d,  $J$  = 10.1 Hz, 1H), 3.71 – 3.57 (m, 1H), 3.54 (dd,  $J$  = 12.6, 3.0 Hz, 1H), 3.45 (d,  $J$  = 10.2 Hz, 1H), 2.71 – 2.50 (m, 2H), 2.24 (dd,  $J$  = 12.6, 11.2 Hz, 1H).

$^{13}\text{C}\{^1\text{H}\}$  NMR (100 MHz,  $\text{CDCl}_3$ ):  $\delta$  143.8, 143.7, 135.2, 132.1, 131.6, 128.2, 127.9, 127.6, 127.5, 127.4, 126.4, 126.1, 125.7, 125.6, 125.5, 125.3, 58.5, 57.7, 51.0, 41.5,

31.4.

Spectral data are in agreement with literature values<sup>[1]</sup>.

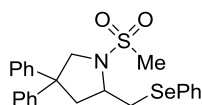

**1-(Methylsulfonyl)-4,4-diphenyl-2-((phenylselanyl)methyl)pyrrolidine (3e).** Compound **3e** was prepared according to the general procedure and isolated as an oil (78 mg, 83% yield) after flash chromatography (petroleum ether/ethyl acetate=10/1).

<sup>1</sup>H NMR (400 MHz, CDCl<sub>3</sub>): δ 7.44 (dd, *J* = 7.6, 1.9 Hz, 2H), 7.27 – 7.15 (m, 9H), 7.14 – 7.07 (m, 4H), 4.28 – 4.06 (m, 2H), 3.89 (dtd, *J* = 10.3, 7.5, 3.0 Hz, 1H), 3.51 (dd, *J* = 12.4, 3.1 Hz, 1H), 3.18 (ddd, *J* = 13.4, 7.1, 1.7 Hz, 1H), 2.78 (dd, *J* = 12.3, 9.9 Hz, 1H), 2.36 (dd, *J* = 13.4, 7.9 Hz, 1H), 2.13 (s, 3H).

<sup>13</sup>C{<sup>1</sup>H} NMR (100 MHz, CDCl<sub>3</sub>): δ 143.8, 143.2, 131.3, 128.3, 128.2, 127.9, 127.7, 126.0, 126.0, 125.8, 125.7, 125.4, 59.0, 58.6, 52.1, 42.4, 34.7, 32.1.

Spectral data are in agreement with literature values<sup>[1]</sup>.

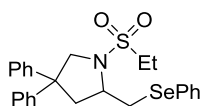

**1-(Ethylsulfonyl)-4,4-diphenyl-2-((phenylselanyl)methyl)pyrrolidine (3f).** Compound **3f** was prepared according to the general procedure and isolated as an oil (79 mg, 81% yield) after flash chromatography (petroleum ether/ethyl acetate=10/1).

<sup>1</sup>H NMR (400 MHz, CDCl<sub>3</sub>): δ 7.45 – 7.38 (m, 2H), 7.31 – 7.22 (m, 2H), 7.23 – 7.14 (m, 7H), 7.13 – 7.05 (m, 4H), 4.20 (dd, *J* = 10.7, 1.6 Hz, 1H), 4.09 – 3.91 (m, 2H), 3.43 (dd, *J* = 12.3, 3.0 Hz, 1H), 3.03 (ddd, *J* = 13.0, 7.0, 1.6 Hz, 1H), 2.79 (dd, *J* = 12.3, 9.6 Hz, 1H), 2.63 – 2.39 (m, 3H), 1.11 (t, *J* = 7.4 Hz, 3H).

<sup>13</sup>C{<sup>1</sup>H} NMR (100 MHz, CDCl<sub>3</sub>): δ 144.0, 143.2, 131.2, 128.5, 128.2, 127.7, 127.6, 125.9, 125.8, 125.7, 125.6, 125.5, 58.4, 58.2, 52.1, 44.6, 42.5, 31.9, 6.9.

Spectral data are in agreement with literature values<sup>[1]</sup>.

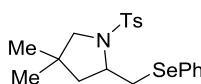

**4,4-Dimethyl-2-((phenylselanyl)methyl)-1-tosylpyrrolidine (3g).** Compound **3g** was prepared according to the general procedure and isolated as a yellow solid (70 mg, 83% yield) after flash chromatography (petroleum ether/ethyl acetate=20/1). mp=103-104 °C.

<sup>1</sup>H NMR (400 MHz, CDCl<sub>3</sub>): δ 7.57 – 7.47 (m, 2H), 7.42 (d, *J* = 8.3 Hz, 2H), 7.27 – 7.22 (m, 3H), 7.13 (d, *J* = 8.3 Hz, 2H), 3.76 (dd, *J* = 12.2, 2.9 Hz, 1H), 3.59 (dtd, *J* = 10.6, 7.7, 2.9 Hz, 1H), 3.14 (d, *J* = 10.5 Hz, 1H), 2.97 (dd, *J* = 10.5, 1.2 Hz, 1H), 2.89 (dd, *J* = 12.3, 10.4 Hz, 1H), 2.31 (s, 3H), 1.79 (ddd, *J* = 12.8, 7.4, 1.2 Hz, 1H), 1.51 (dd, *J* = 12.8, 8.0 Hz, 1H), 0.95 (s, 3H), 0.36 (s, 3H).

<sup>13</sup>C{<sup>1</sup>H} NMR (100 MHz, CDCl<sub>3</sub>): δ 142.3, 133.1, 131.7, 128.5, 128.4, 128.2, 126.5, 125.96, 61.0, 58.9, 45.7, 36.2, 33.0, 25.4, 24.8, 20.5.

Spectral data are in agreement with literature values<sup>[1]</sup>.

**Dimethyl 5-((phenylselanyl)methyl)-1-tosylpyrrolidine-3,3-dicarboxylate (3h).**

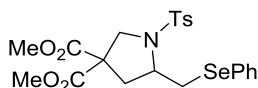

Compound **3h** was prepared according to the general procedure and isolated as an oil (73 mg, 72% yield) after flash chromatography (petroleum ether/ethyl acetate=4/1).

**<sup>1</sup>H NMR** (400 MHz, CDCl<sub>3</sub>): δ 7.56 – 7.50 (m, 2H), 7.36 (d, *J* = 8.3 Hz, 2H), 7.29 – 7.21 (m, 3H), 7.18 – 7.12 (m, 2H), 4.00 (d, *J* = 11.4 Hz, 1H), 3.75 – 3.62 (m, 6H), 3.38 (s, 3H), 2.86 (dd, *J* = 12.4, 10.3 Hz, 1H), 2.53 (dd, *J* = 13.3, 8.2 Hz, 1H), 2.41 – 2.28 (m, 4H).

**<sup>13</sup>C{<sup>1</sup>H} NMR** (100 MHz, CDCl<sub>3</sub>): δ 168.3, 168.1, 142.7, 132.2, 128.6, 128.2, 127.8, 126.7, 126.3, 126.0, 58.4, 56.9, 53.7, 52.3, 52.1, 37.5, 32.0, 20.5.

Spectral data are in agreement with literature values<sup>[1]</sup>.

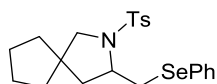

**3-((Phenylselanyl)methyl)-2-tosyl-2-azaspiro[4.4]nonane (3i).**

Compound **3i** was prepared according to the general procedure and isolated as an oil (73 mg, 81% yield) after flash chromatography (petroleum ether/ethyl acetate=20/1).

**<sup>1</sup>H NMR** (400 MHz, CDCl<sub>3</sub>): δ 7.52 (dd, *J* = 7.6, 1.9 Hz, 2H), 7.41 (d, *J* = 8.3 Hz, 2H), 7.30 – 7.21 (m, 3H), 7.13 (d, *J* = 8.0 Hz, 2H), 3.75 (dd, *J* = 12.3, 3.0 Hz, 1H), 3.53 (dtd, *J* = 10.5, 7.2, 3.0 Hz, 1H), 3.24 (d, *J* = 10.2 Hz, 1H), 2.94 (d, *J* = 10.2 Hz, 1H), 2.88 (dd, *J* = 12.3, 10.7 Hz, 1H), 2.32 (s, 3H), 1.84 (dd, *J* = 12.9, 7.4 Hz, 1H), 1.64 (dd, *J* = 12.8, 6.8 Hz, 1H), 1.56 – 1.31 (m, 6H), 0.87 (ddd, *J* = 12.6, 8.2, 6.9 Hz, 1H), 0.73 (ddd, *J* = 13.2, 7.8, 6.0 Hz, 1H).

**<sup>13</sup>C{<sup>1</sup>H} NMR** (100 MHz, CDCl<sub>3</sub>): δ 142.4, 132.9, 131.7, 128.5, 128.3, 128.2, 126.5, 126.0, 59.4, 59.0, 47.3, 43.2, 35.6, 35.4, 32.7, 23.5, 23.2, 20.5.

Spectral data are in agreement with literature values<sup>[1]</sup>.

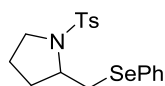

**2-((Phenylselanyl)methyl)-1-tosylpyrrolidine (3j).**

Compound **3j** was prepared according to the general procedure and isolated as a white solid (57 mg, 72% yield) after flash chromatography (petroleum ether/ethyl acetate=10/1). mp=90-92° C.

**<sup>1</sup>H NMR** (400 MHz, CDCl<sub>3</sub>): δ 7.51 (d, *J* = 8.0 Hz, 2H), 7.43 (d, *J* = 8.2 Hz, 2H), 7.31 – 7.20 (m, 3H), 7.14 (d, *J* = 8.0 Hz, 2H), 3.62 – 3.47 (m, 2H), 3.47 – 3.31 (m, 1H), 3.04 (dt, *J* = 9.9, 7.1 Hz, 1H), 2.75 (dd, *J* = 13.1, 11.4 Hz, 1H), 2.32 (s, 3H), 1.81 – 1.65 (m, 2H), 1.60 (ddd, *J* = 15.3, 7.6, 3.6 Hz, 1H), 1.49 – 1.32 (m, 1H).

**<sup>13</sup>C{<sup>1</sup>H} NMR** (100 MHz, CDCl<sub>3</sub>): δ 142.7, 132.8, 131.3, 128.6, 128.2, 128.1, 126.4, 125.9, 58.8, 48.9, 31.9, 30.0, 22.8, 20.5.

Spectral data are in agreement with literature values<sup>[1]</sup>.

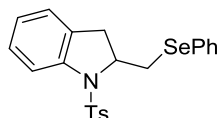

**2-((Phenylselanyl)methyl)-1-tosylindoline (3k).**

Compound **3k** was prepared according to the general procedure and isolated as an oil (66 mg, 75% yield) after flash chromatography (petroleum ether/ethyl acetate=20/1).

**<sup>1</sup>H NMR** (400 MHz, CDCl<sub>3</sub>): δ 7.57 (d, *J* = 8.1 Hz, 1H), 7.55 – 7.44 (m, 2H), 7.34 – 7.22 (m, 5H), 7.17 – 7.09 (m, 1H), 7.05 – 6.99 (m, 2H), 6.98 – 6.88 (m, 2H), 4.20 – 4.10 (m, 1H), 3.58 (dd, *J* = 12.5, 3.5 Hz, 1H), 2.85 (dd, *J* = 12.5, 10.8 Hz, 1H), 2.80 – 2.76 (m, 2H), 2.24 (s, 3H).

**<sup>13</sup>C{<sup>1</sup>H} NMR** (100 MHz, CDCl<sub>3</sub>): δ 142.9, 140.3, 133.5, 131.4, 129.9, 128.5, 128.2, 127.8, 126.8, 126.1, 125.9, 124.2, 123.7, 116.0, 60.5, 33.0, 32.0, 20.5.

Spectral data are in agreement with literature values<sup>[1]</sup>.

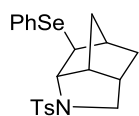

**6-(Phenylselanyl)-1-tosyloctahydro-3,5-methanocyclopenta[b]pyrrole (3l).** Compound **3l** was prepared according to the general procedure and isolated as a white solid (67 mg, 77% yield) after flash chromatography (petroleum ether/ethyl acetate = 12/1). mp=88-90° C.

<sup>1</sup>H NMR (400 MHz, CDCl<sub>3</sub>): δ 7.59 (d, *J* = 8.2 Hz, 2H), 7.49 (dd, *J* = 6.4, 3.0 Hz, 2H), 7.23 – 7.15 (m, 5H), 3.92 (d, *J* = 5.0 Hz, 1H), 3.20 (d, *J* = 3.6 Hz, 2H), 2.98 (d, *J* = 1.6 Hz, 1H), 2.33 (s, 3H), 2.24 (t, *J* = 8.3 Hz, 2H), 2.14 (d, *J* = 3.4 Hz, 1H), 1.92 (ddd, *J* = 14.8, 10.6, 4.4 Hz, 1H), 1.83 (d, *J* = 10.8 Hz, 1H), 1.37 (d, *J* = 11.0 Hz, 1H), 0.97 (d, *J* = 13.0 Hz, 1H).

<sup>13</sup>C{<sup>1</sup>H} NMR (100 MHz, CDCl<sub>3</sub>): δ 142.1, 135.0, 133.2, 128.8, 128.6, 128.0, 126.4, 126.1, 66.4, 53.0, 52.4, 45.0, 40.2, 36.5, 36.3, 35.1, 20.5.

Spectral data are in agreement with literature values<sup>[1]</sup>.

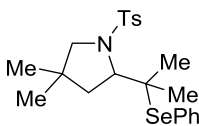

**4,4-Dimethyl-2-(2-(phenylselanyl)propan-2-yl)-1-tosylpyrrolidine (3m).** Compound **3m** was prepared according to the general procedure and isolated as a yellow solid (65 mg, 72% yield) after flash chromatography (petroleum ether/ethyl acetate=30/1). mp=78-80° C.

<sup>1</sup>H NMR (400 MHz, CDCl<sub>3</sub>): 7.62 (d, *J* = 8.4 Hz, 2H), 7.47 (d, *J* = 8.2 Hz, 2H), 7.23 – 7.13 (m, 5H), 4.34 (t, *J* = 8.1 Hz, 1H), 3.63 (d, *J* = 11.5 Hz, 1H), 3.06 (d, *J* = 11.5 Hz, 1H), 2.34 (s, 3H), 2.01 – 1.86 (m, 2H), 1.21 (s, 3H), 1.15 (s, 3H), 1.06 (s, 3H), 0.86 (s, 3H).

<sup>13</sup>C{<sup>1</sup>H} NMR (100 MHz, CDCl<sub>3</sub>): 142.6, 139.7, 138.3, 129.4, 128.7, 128.7, 127.0, 126.6, 69.5, 62.6, 53.8, 44.7, 39.4, 29.5, 27.2, 26.7, 25.9, 21.5.

Spectral data are in agreement with literature values<sup>[1]</sup>.

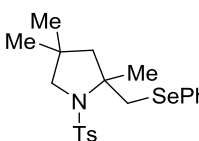

**2,4,4-Trimethyl-2-((phenylselanyl)methyl)-1-tosylpyrrolidine (3n).** Compound **3n** was prepared according to the general procedure and isolated as an oil (70 mg, 80% yield) after flash chromatography (petroleum ether/ethyl acetate=35/1).

<sup>1</sup>H NMR (400 MHz, CDCl<sub>3</sub>): δ 7.67 (d, *J* = 8.3 Hz, 2H), 7.52 – 7.32 (m, 2H), 7.32 – 7.12 (m, 5H), 3.56 (d, *J* = 11.8 Hz, 1H), 3.41 (d, *J* = 11.8 Hz, 1H), 3.08 (d, *J* = 9.4 Hz, 1H), 3.01 (d, *J* = 9.4 Hz, 1H), 2.34 (s, 3H), 2.03 (d, *J* = 13.2 Hz, 1H), 1.56 (d, *J* = 8.7 Hz, 1H), 1.53 (s, 3H), 0.92 (s, 3H), 0.87 (s, 3H).

<sup>13</sup>C{<sup>1</sup>H} NMR (100 MHz, CDCl<sub>3</sub>): δ 141.9, 136.8, 131.5, 130.1, 128.4, 128.1, 126.3, 125.8, 68.1, 60.7, 52.7, 40.5, 35.2, 26.5, 26.2, 26.0, 20.5.

Spectral data are in agreement with literature values<sup>[1]</sup>.

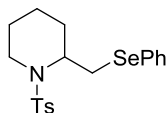

**2-((Phenylselanyl)methyl)-1-tosylpiperidine (3o).** Compound **3o** was prepared according to the general procedure and isolated as an

oil (49 mg, 60% yield) after flash chromatography (petroleum ether/ethyl acetate=15/1).

$^1\text{H NMR}$  (400 MHz,  $\text{CDCl}_3$ ):  $\delta$  7.53 (d,  $J = 8.3$  Hz, 2H), 7.46 – 7.38 (m, 2H), 7.25 – 7.17 (m, 3H), 7.15 (d,  $J = 8.1$  Hz, 2H), 4.14 – 4.07 (m, 1H), 3.82 – 3.54 (m, 1H), 3.02 (dd,  $J = 12.3, 10.5$  Hz, 1H), 2.96 – 2.81 (m, 2H), 2.33 (s, 3H), 1.95 – 1.81 (m, 1H), 1.44 – 1.18 (m, 5H).

$^{13}\text{C}\{^1\text{H}\}$  NMR (100 MHz,  $\text{CDCl}_3$ ):  $\delta$  142.0, 137.1, 131.9, 128.6, 128.4, 128.1, 126.2, 125.9, 51.6, 39.8, 26.2, 25.1, 23.6, 20.5, 17.0.

Spectral data are in agreement with literature values<sup>[1]</sup>.

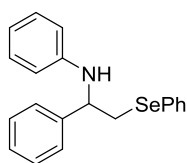

**N-(1-Phenyl-2-(phenylselanyl)ethyl)aniline (4a).** Compound **4a** was prepared according to the general procedure and isolated as an oil (53 mg, 75% yield) after flash chromatography (petroleum ether/ethyl acetate = 50/1).

$^1\text{H NMR}$  (400 MHz,  $\text{CDCl}_3$ ):  $\delta$  7.52 – 7.40 (m, 2H), 7.34 – 7.10 (m, 8H), 7.04 – 6.89 (m, 2H), 6.58 (t,  $J = 7.3$  Hz, 1H), 6.36 (d,  $J = 8.5$  Hz, 2H), 4.56 – 4.25 (m, 2H), 3.27 (dd,  $J = 12.6, 4.5$  Hz, 1H), 3.11 (dd,  $J = 12.6, 8.8$  Hz, 1H).

$^{13}\text{C}\{^1\text{H}\}$  NMR (100 MHz,  $\text{CDCl}_3$ ):  $\delta$  147.0, 142.7, 133.6, 129.3, 129.2, 129.1, 128.9, 127.6, 127.6, 126.4, 117.9, 113.8, 57.9, 36.5.

Spectral data are in agreement with literature values<sup>[2]</sup>.

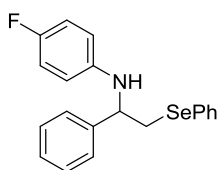

**4-Fluoro-N-(1-phenyl-2-(phenylselanyl)ethyl)aniline (4b).**

Compound **4b** was prepared according to the general procedure and isolated as an oil (58 mg, 79% yield) after flash chromatography (petroleum ether/ethyl acetate = 20/1).

$^1\text{H NMR}$  (400 MHz,  $\text{CDCl}_3$ ):  $\delta$  7.43 (dd,  $J = 7.2, 2.2$  Hz, 2H), 7.33 – 7.02 (m, 8H), 6.69 (t,  $J = 8.6$  Hz, 2H), 6.31 (dd,  $J = 8.8, 4.4$  Hz, 2H), 4.48 (brs, 1H), 4.27 (dd,  $J = 9.0, 4.6$  Hz, 1H), 3.29 (dd,  $J = 12.6, 4.6$  Hz, 1H), 3.11 (dd,  $J = 12.6, 9.0$  Hz, 1H).

$^{13}\text{C}\{^1\text{H}\}$  NMR (100 MHz,  $\text{CDCl}_3$ ):  $\delta$  156.1 (d,  $J_{\text{C-F}} = 236.5$  Hz), 142.3, 133.6, 129.3, 129.1, 128.9, 127.7, 127.6, 126.4, 115.5 (d,  $J_{\text{C-F}} = 22.3$  Hz), 114.9, 58.6, 36.4.

$^{19}\text{F NMR}$  (376 MHz,  $\text{CDCl}_3$ ):  $\delta$  -127.5.

Spectral data are in agreement with literature values<sup>[2]</sup>.

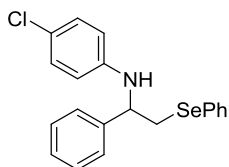

**4-Chloro-N-(1-phenyl-2-(phenylselanyl)ethyl)aniline (4c).**

Compound **4c** was prepared according to the general procedure and isolated as an oil (64 mg, 83% yield) after flash chromatography (petroleum ether/ethyl acetate = 30/1).

$^1\text{H NMR}$  (400 MHz,  $\text{CDCl}_3$ ):  $\delta$  7.54 – 7.33 (m, 2H), 7.29 – 7.10 (m, 8H), 6.90 (d,  $J = 8.8$  Hz, 2H), 6.25 (d,  $J = 8.8$  Hz, 2H), 4.39 (d,  $J = 3.8$  Hz, 1H), 4.27 (dt,  $J = 8.6, 4.2$  Hz, 1H), 3.25 (dd,  $J = 12.7, 4.4$  Hz, 1H), 3.06 (dd,  $J = 12.7, 9.1$  Hz, 1H).

$^{13}\text{C}\{^1\text{H}\}$  NMR (100 MHz,  $\text{CDCl}_3$ ):  $\delta$  144.5, 141.1, 132.6, 128.3, 127.9, 127.83, 127.82, 126.26, 126.60, 125.2, 121.3, 113.7, 56.8, 35.3.

Spectral data are in agreement with literature values<sup>[2]</sup>.

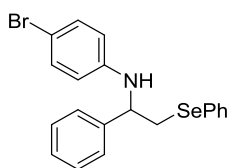

**4-Bromo-N-(1-phenyl-2-(phenylselanyl)ethyl)aniline (4d).**

Compound **4d** was prepared according to the general procedure and isolated as an oil (69 mg, 80% yield) after flash chromatography (petroleum ether/ethyl acetate = 20/1).

<sup>1</sup>H NMR (400 MHz, CDCl<sub>3</sub>): δ 7.43 (d, *J* = 7.7 Hz, 2H), 7.31 – 7.10 (m, 8H), 7.06 (d, *J* = 8.5 Hz, 2H), 6.24 (d, *J* = 8.4 Hz, 2H), 4.49 (brs, 1H), 4.28 (dd, *J* = 9.0, 4.5 Hz, 1H), 3.28 (dd, *J* = 12.7, 4.5 Hz, 1H), 3.10 (dd, *J* = 12.7, 9.0 Hz, 1H).

<sup>13</sup>C{<sup>1</sup>H} NMR (100 MHz, CDCl<sub>3</sub>): δ 145.9, 142.0, 133.7, 131.8, 129.4, 129.0, 128.9, 127.8, 127.7, 126.3, 115.4, 109.7, 57.9, 36.3.

Spectral data are in agreement with literature values<sup>[2]</sup>.

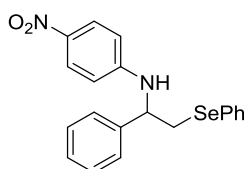

**4-Nitro-N-(1-phenyl-2-(phenylselanyl)ethyl)aniline (4e).**

Compound **4e** was prepared according to the general procedure and isolated as an oil (49 mg, 62% yield) after flash chromatography (petroleum ether/ethyl acetate = 10/1).

<sup>1</sup>H NMR (400 MHz, CDCl<sub>3</sub>): δ 7.88 (d, *J* = 8.9 Hz, 2H), 7.52 – 7.36 (m, 2H), 7.27 – 7.17 (m, 8H), 6.27 (d, *J* = 9.1 Hz, 2H), 5.14 (brs, 1H), 4.43 (dd, *J* = 9.1, 4.4 Hz, 1H), 3.31 (dd, *J* = 12.8, 4.5 Hz, 1H), 3.12 (dd, *J* = 12.9, 9.0 Hz, 1H).

<sup>13</sup>C{<sup>1</sup>H} NMR (100 MHz, CDCl<sub>3</sub>): δ 152.2, 140.9, 138.5, 133.9, 129.5, 129.2, 128.5, 128.2, 128.1, 126.2, 126.1, 112.2, 57.6, 35.7.

Spectral data are in agreement with literature values<sup>[2]</sup>.

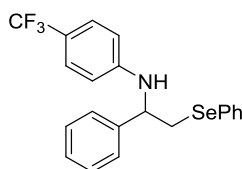

**N-(1-Phenyl-2-(phenylselanyl)ethyl)-4-(trifluoromethyl)aniline (4f).**

Compound **4f** was prepared according to the general procedure and isolated as an oil (61 mg, 73% yield) after flash chromatography (petroleum ether/ethyl acetate = 10/1).

<sup>1</sup>H NMR (400 MHz, CDCl<sub>3</sub>): δ 7.44 (d, *J* = 7.9 Hz, 2H), 7.30 – 7.11 (m, 10H), 6.34 (d, *J* = 8.4 Hz, 2H), 4.70 (brs, 1H), 4.37 (dd, *J* = 9.1, 4.4 Hz, 1H), 3.29 (dd, *J* = 12.8, 4.4 Hz, 1H), 3.10 (dd, *J* = 12.8, 9.1 Hz, 1H).

<sup>13</sup>C{<sup>1</sup>H} NMR (100 MHz, CDCl<sub>3</sub>): δ 149.5, 141.6, 133.8, 129.4, 129.2, 128.8, 127.9, 127.8, 126.5 (q, *J*<sub>C-F</sub> = 3.8 Hz), 126.2, 125.1 (q, *J*<sub>C-F</sub> = 270.0 Hz), 119.3 (q, *J*<sub>C-F</sub> = 30.0 Hz), 112.9, 57.6, 36.2.

<sup>19</sup>F NMR (376 MHz, CDCl<sub>3</sub>): δ -61.0.

Spectral data are in agreement with literature values<sup>[2]</sup>.

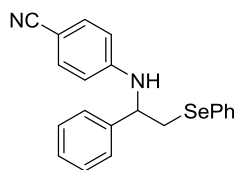

**4-((1-Phenyl-2-(phenylselanyl)ethyl)amino)benzonitrile (4g).**

Compound **4g** was prepared according to the general procedure and isolated as an oil (57 mg, 75% yield) after flash chromatography (petroleum ether/ethyl acetate = 30/1).

<sup>1</sup>H NMR (400 MHz, CDCl<sub>3</sub>): δ 7.40 (d, *J* = 8.6 Hz, 2H), 7.21 – 7.15 (m, 10H), 6.26 (d, *J* = 8.6 Hz, 2H), 4.93 (brs, 1H), 4.52 –



4.07 (m, 1H), 3.24 (dd,  $J = 12.8, 4.5$  Hz, 1H), 3.07 (dd,  $J = 12.8, 9.0$  Hz, 1H).

$^{13}\text{C}\{^1\text{H}\}$  NMR (100 MHz,  $\text{CDCl}_3$ ):  $\delta$  150.3, 141.3, 133.8, 133.6, 129.5, 129.1, 128.8, 128.0, 127.9, 126.2, 120.5, 113.3, 99.3, 57.4, 35.9.

Spectral data are in agreement with literature values<sup>[3]</sup>.

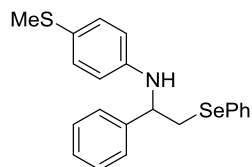

**4-(Methylthio)-N-(1-phenyl-2-(phenylselanyl)ethyl)aniline (4h).** Compound **4h** was prepared according to the general procedure and isolated as a yellow solid (56 mg, 70% yield) after flash chromatography (petroleum ether/ethyl acetate = 50/1). mp=55-56° C.

$^1\text{H}$  NMR (400 MHz,  $\text{CDCl}_3$ ):  $\delta$  7.52 – 7.38 (m, 2H), 7.33 – 7.11 (m, 8H), 7.01 (d,  $J = 8.4$  Hz, 2H), 6.31 (d,  $J = 8.2$  Hz, 2H), 4.43 (brs, 1H), 4.33 (dd,  $J = 9.0, 4.5$  Hz, 1H), 3.28 (dd,  $J = 12.6, 4.5$  Hz, 1H), 3.10 (dd,  $J = 12.6, 8.9$  Hz, 1H), 2.28 (s, 3H).

$^{13}\text{C}\{^1\text{H}\}$  NMR (100 MHz,  $\text{CDCl}_3$ ):  $\delta$  145.8, 142.4, 133.6, 131.0, 129.3, 129.1, 128.9, 127.7, 127.6, 126.3, 114.4, 57.9, 36.4, 18.9.

HRMS:  $m/z$   $[\text{M} + \text{H}]^+$  calcd for  $\text{C}_{21}\text{H}_{22}\text{NSSe}$ , 400.0633; found, 400.0629.

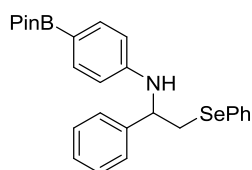

**N-(1-Phenyl-2-(phenylselanyl)ethyl)-4-(4,4,5,5-tetramethyl-1,3,2-dioxaborolan-2-yl)aniline (4i).** Compound **4i** was prepared according to the general procedure and isolated as a yellow solid (72 mg, 75% yield) after flash chromatography (petroleum ether/ethyl acetate = 40/1). mp=122-123° C.

$^1\text{H}$  NMR (400 MHz,  $\text{CDCl}_3$ ):  $\delta$  7.54 – 7.36 (m, 4H), 7.32 – 6.93 (m, 8H), 6.33 (d,  $J = 8.1$  Hz, 2H), 4.55 (brs, 1H), 4.42 (dd,  $J = 8.6, 4.8$  Hz, 1H), 3.26 (dd,  $J = 12.6, 4.8$  Hz, 1H), 3.12 (dd,  $J = 12.6, 8.5$  Hz, 1H), 1.20 (s, 12H).

$^{13}\text{C}\{^1\text{H}\}$  NMR (100 MHz,  $\text{CDCl}_3$ ):  $\delta$  149.5, 142.2, 136.2, 133.7, 129.3, 129.2, 128.9, 127.7, 127.6, 126.3, 112.8, 83.2, 57.3, 36.2, 24.9, 24.8.

HRMS:  $m/z$   $[\text{M} + \text{H}]^+$  calcd for  $\text{C}_{26}\text{H}_{31}\text{BNO}_2\text{Se}$ , 480.1608; found, 480.1613.

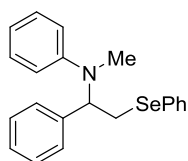

**N-Methyl-N-(1-phenyl-2-(phenylselanyl)ethyl)aniline (4j).**

Compound **4j** was prepared according to the general procedure and isolated as an oil (60 mg, 82% yield) after flash chromatography (petroleum ether/ethyl acetate = 30/1).

$^1\text{H}$  NMR (400 MHz,  $\text{CDCl}_3$ ):  $\delta$  7.51 – 7.26 (m, 2H), 7.32 – 6.90 (m, 10H), 6.69 – 6.67 (m, 3H), 5.14 – 5.10 (m, 1H), 3.51 – 3.44 (m, 2H), 2.61 (s, 3H).

$^{13}\text{C}\{^1\text{H}\}$  NMR (100 MHz,  $\text{CDCl}_3$ ):  $\delta$  150.1, 139.8, 133.3, 130.1, 129.2, 129.1, 128.5, 127.5, 127.4, 127.2, 117.4, 113.7, 61.9, 31.9, 30.2.

Spectral data are in agreement with literature values<sup>[3]</sup>.

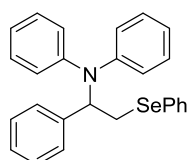

**N-Phenyl-N-(1-phenyl-2-(phenylselanyl)ethyl)aniline (4k).**

Compound **4k** was prepared according to the general procedure and isolated as an oil (58 mg, 68% yield) after flash chromatography (petroleum ether/ethyl acetate = 80/1).

**<sup>1</sup>H NMR** (400 MHz, CDCl<sub>3</sub>): δ 7.44 – 7.41 (m, 2H), 7.25 – 7.08 (m, 6H), 7.08 – 7.04 (m, 4H), 7.00 – 6.94 (m, 2H), 6.89 – 6.77 (m, 3H), 6.71 – 6.59 (m, 3H), 5.73 – 5.22 (m, 1H), 3.49 – 3.38 (m, 2H).

**<sup>13</sup>C{<sup>1</sup>H} NMR** (100 MHz, CDCl<sub>3</sub>): δ 145.1, 142.0, 138.9, 132.6, 128.9, 128.3, 128.1, 128.0, 127.2, 127.1, 126.5, 126.3, 121.9, 120.9, 119.9, 116.7, 60.8, 28.9.

Spectral data are in agreement with literature values<sup>[2]</sup>.

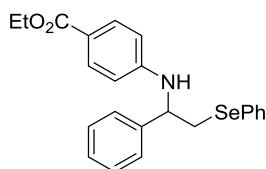

**Ethyl 4-((1-phenyl-2-(phenylselanyl)ethyl)amino)benzoate (4l)**. Compound **4l** was prepared according to the general procedure and isolated as an oil (55 mg, 65% yield) after flash chromatography (petroleum ether/ethyl acetate = 40/1).

**<sup>1</sup>H NMR** (400 MHz, CDCl<sub>3</sub>): δ 7.68 (d, *J* = 8.4 Hz, 2H), 7.57 – 7.36 (m, 2H), 7.33 – 7.06 (m, 8H), 6.30 (d, *J* = 8.5 Hz, 2H), 4.78 (brs, 1H), 4.42 (dd, *J* = 8.8, 4.6 Hz, 1H), 4.19 (q, *J* = 7.1 Hz, 2H), 3.28 (dd, *J* = 12.7, 4.6 Hz, 1H), 3.11 (dd, *J* = 12.8, 8.8 Hz, 1H), 1.23 (t, *J* = 7.1 Hz, 3H).

**<sup>13</sup>C{<sup>1</sup>H} NMR** (100 MHz, CDCl<sub>3</sub>): δ 166.8, 150.7, 141.7, 133.8, 131.3, 129.4, 129.0, 128.9, 127.9, 127.8, 126.2, 119.3, 112.5, 60.2, 57.4, 36.1, 14.5.

Spectral data are in agreement with literature values<sup>[2]</sup>.

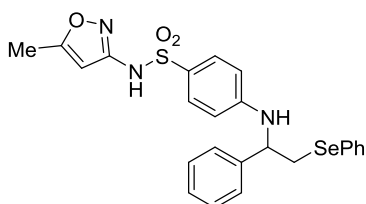

**N-(5-Methylisoxazol-3-yl)-4-((1-phenyl-2-(phenylselanyl)ethyl)amino)benzenesulfonamide (4m)**.

Compound **4m** was prepared according to the general procedure and isolated as an oil (59 mg, 58% yield) after flash chromatography (petroleum ether/ethyl acetate = 3/1).

**<sup>1</sup>H NMR** (400 MHz, CDCl<sub>3</sub>): δ 8.22 (s, 1H), 8.09 (s, 1H), 7.81 (dd, *J* = 5.4, 3.1 Hz, 2H), 7.69 (dd, *J* = 5.5, 3.1 Hz, 2H), 7.49 – 7.40 (m, 3H), 7.31 – 7.11 (m, 5H), 6.28 (d, *J* = 8.5 Hz, 2H), 6.11 (s, 1H), 4.36 (dd, *J* = 9.0, 4.5 Hz, 1H), 3.28 (dd, *J* = 12.8, 4.5 Hz, 1H), 3.09 (dd, *J* = 12.9, 9.0 Hz, 1H), 2.26 (s, 3H).

**<sup>13</sup>C{<sup>1</sup>H} NMR** (100 MHz, CDCl<sub>3</sub>): δ 170.7, 151.0, 141.1, 134.4, 133.8, 132.6, 129.5, 129.1, 129.0, 128.6, 128.0, 127.9, 126.1, 123.7, 112.8, 95.5, 57.4, 35.9, 12.8.

Spectral data are in agreement with literature values<sup>[2]</sup>.

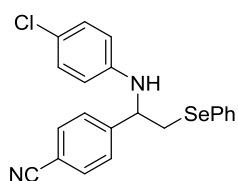

**4-(1-((4-chlorophenyl)amino)-2-(phenylselanyl)ethyl)benzotrile (5a)**. Compound **5a** was prepared according to the general procedure and isolated as an oil (63 mg, 76% yield) after flash chromatography (petroleum ether/ethyl acetate = 60/1).

**<sup>1</sup>H NMR** (400 MHz, CDCl<sub>3</sub>): δ 7.48 (d, *J* = 8.3 Hz, 2H), 7.40 (d, *J* = 6.5 Hz, 2H), 7.32 (d, *J* = 8.3 Hz, 2H), 7.27 – 7.12 (m, 3H), 6.92 (d, *J* = 8.8 Hz, 2H), 6.20 (d, *J* = 8.9 Hz, 2H), 4.29 (dd, *J* = 8.9, 4.3 Hz, 1H), 3.38 (brs, 1H), 3.23 (dd, *J* = 12.9, 4.3 Hz, 1H), 3.02 (dd, *J* = 12.9, 8.9 Hz, 1H).

**<sup>13</sup>C{<sup>1</sup>H} NMR** (100 MHz, CDCl<sub>3</sub>): δ 147.8, 145.0, 134.0, 133.9, 132.8, 129.5, 129.1, 129.0, 128.3, 128.1, 127.2, 123.1, 118.7, 116.3, 114.8, 111.5, 57.6, 35.8.

**HRMS**: *m/z* [M + H]<sup>+</sup> calcd for C<sub>21</sub>H<sub>18</sub>ClN<sub>2</sub>Se, 413.0318; found, 413.0320.

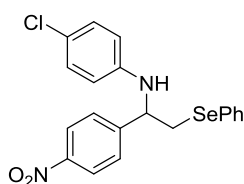

**4-Chloro-N-(1-(4-nitrophenyl)-2-(phenylselanyl)ethyl)aniline (5b).** Compound **5b** was prepared according to the general procedure and isolated as an oil (59 mg, 68% yield) after flash chromatography (petroleum ether/ethyl acetate = 50/1).

$^1\text{H NMR}$  (400 MHz,  $\text{CDCl}_3$ ):  $\delta$  8.03 (d,  $J = 8.3$  Hz, 2H), 7.51 – 7.32 (m, 4H), 7.21 – 7.14 (m, 3H), 6.92 (d,  $J = 8.4$  Hz, 2H),

6.20 (d,  $J = 8.5$  Hz, 2H), 4.49 (s, 1H), 4.35 (dd,  $J = 8.8, 4.3$  Hz, 1H), 3.24 (dd,  $J = 12.9, 4.4$  Hz, 1H), 3.04 (dd,  $J = 12.9, 8.7$  Hz, 1H).

$^{13}\text{C}\{^1\text{H}\}$  NMR (100 MHz,  $\text{CDCl}_3$ ):  $\delta$  149.9, 147.4, 144.9, 134.0, 129.5, 129.1, 128.1, 127.3, 124.2, 123.1, 116.3, 114.8, 57.4, 35.8.

**HRMS:**  $m/z$   $[\text{M} + \text{H}]^+$  calcd for  $\text{C}_{20}\text{H}_{18}\text{ClN}_2\text{O}_2\text{Se}$ , 433.0217; found, 433.0221.

### Methyl

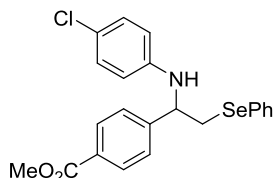

**4-(1-((4-chlorophenyl)amino)-2-(phenylselanyl)ethyl)benzoate (5c).** Compound **5c** was prepared according to the general procedure and isolated as an oil (65 mg, 73% yield) after flash chromatography (petroleum ether/ethyl acetate = 50/1).

$^1\text{H NMR}$  (400 MHz,  $\text{CDCl}_3$ ):  $\delta$  7.89 (d,  $J = 8.4$  Hz, 2H), 7.41 (d,  $J = 8.1$  Hz, 2H), 7.28 (d,  $J = 8.4$  Hz, 2H), 7.22 – 7.15 (m, 3H), 6.90 (d,  $J = 8.8$  Hz, 2H), 6.22 (d,  $J = 9.0$  Hz, 2H), 4.43 (brs, 1H), 4.30 (dd,  $J = 9.2, 4.3$  Hz, 1H), 3.80 (s, 3H), 3.24 (dd,  $J = 12.7, 4.3$  Hz, 1H), 3.03 (dd,  $J = 12.7, 9.0$  Hz, 1H).

$^{13}\text{C}\{^1\text{H}\}$  NMR (100 MHz,  $\text{CDCl}_3$ ):  $\delta$  166.8, 147.6, 145.3, 133.9, 130.3, 129.4, 129.1, 129.0, 127.9, 126.4, 122.8, 116.3, 114.8, 57.7, 52.2, 36.0.

**HRMS:**  $m/z$   $[\text{M} + \text{H}]^+$  calcd for  $\text{C}_{22}\text{H}_{21}\text{ClNO}_2\text{Se}$ , 446.0421; found, 446.0411.

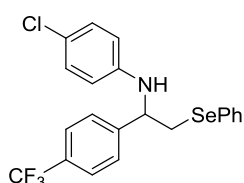

**4-Chloro-N-(2-(phenylselanyl)-1-(4-(trifluoromethyl)phenyl)ethyl)aniline (5d).** Compound **5d** was prepared according to the general procedure and isolated as a yellow solid (68 mg, 75% yield) after flash chromatography (petroleum ether/ethyl acetate = 40/1). mp=97-98 $^\circ$  C.

$^1\text{H NMR}$  (400 MHz,  $\text{CDCl}_3$ ):  $\delta$  7.46 (d,  $J = 8.1$  Hz, 2H), 7.40 (d,  $J = 6.3$  Hz, 2H), 7.33 (d,  $J = 8.1$  Hz, 2H), 7.24 – 7.13 (m, 3H), 6.93 (d,  $J = 8.8$  Hz, 2H), 6.23 (d,  $J = 8.8$  Hz, 2H), 4.48 (s, 1H), 4.33 (dd,  $J = 8.9, 4.4$  Hz, 1H), 3.50 – 3.23 (m, 1H), 3.05 (dd,  $J = 12.8, 8.8$  Hz, 1H).

$^{13}\text{C}\{^1\text{H}\}$  NMR (100 MHz,  $\text{CDCl}_3$ ):  $\delta$  146.3, 145.1, 133.9, 129.9 (q,  $J_{\text{C-F}} = 32.0$  Hz), 129.2 (d,  $J_{\text{C-F}} = 39.3$  Hz), 128.5, 128.0, 126.7, 125.9 (q,  $J_{\text{C-F}} = 3.8$  Hz), 124.1 (q,  $J_{\text{C-F}} = 270.0$  Hz), 123.0, 114.9, 57.6, 36.1.

$^{19}\text{F NMR}$  (376 MHz,  $\text{CDCl}_3$ ):  $\delta$  -62.4.

**HRMS:**  $m/z$   $[\text{M} + \text{H}]^+$  calcd for  $\text{C}_{21}\text{H}_{18}\text{ClF}_3\text{NSe}$ , 456.0240; found, 456.0239.

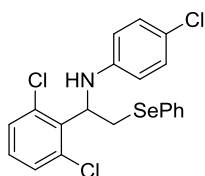

**4-Chloro-N-(1-(2,6-dichlorophenyl)-2-(phenylselanyl)ethyl)aniline (5e).** Compound **5e** was prepared according to the general procedure and isolated as a yellow solid (77 mg, 84% yield) after

flash chromatography (petroleum ether/ethyl acetate = 60/1). mp=79-80° C.

<sup>1</sup>H NMR (400 MHz, CDCl<sub>3</sub>): δ 7.58 – 7.28 (m, 2H), 7.25 – 6.98 (m, 4H), 7.06 – 7.03 (m, 1H), 6.97 – 6.93 (m, 3H), 6.38 (d, *J* = 8.7 Hz, 2H), 5.32 (dd, *J* = 9.6, 6.0 Hz, 1H), 4.70 (s, 1H), 3.51 (dd, *J* = 12.5, 9.5 Hz, 1H), 3.27 (dd, *J* = 12.6, 6.0 Hz, 1H).

<sup>13</sup>C{<sup>1</sup>H} NMR (100 MHz, CDCl<sub>3</sub>): δ 145.0, 135.6, 133.7, 130.5, 129.3, 129.2, 129.1, 129.0, 128.7, 127.5, 122.7, 114.6, 55.2, 30.5.

HRMS: *m/z* [M + H]<sup>+</sup> calcd for C<sub>20</sub>H<sub>17</sub>Cl<sub>3</sub>NSe, 455.9586; found, 455.9579.

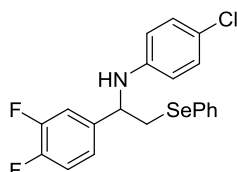

**4-Chloro-N-(1-(3,4-difluorophenyl)-2-(phenylselanyl)ethyl)aniline (5f).** Compound **5f** was prepared according to the general procedure and isolated as an oil (68 mg, 80% yield) after flash chromatography (petroleum ether/ethyl acetate = 50/1).

<sup>1</sup>H NMR (400 MHz, CDCl<sub>3</sub>): δ 7.40 (d, *J* = 6.0 Hz, 2H), 7.25 – 7.12 (m, 3H), 7.10 – 6.80 (m, 5H), 6.22 (d, *J* = 8.7 Hz, 2H), 4.40 (brs, 1H), 4.20 (dd, *J* = 8.9, 4.3 Hz, 1H), 3.20 (dd, *J* = 12.8, 4.4 Hz, 1H), 3.00 (dd, *J* = 12.8, 8.8 Hz, 1H).

<sup>13</sup>C{<sup>1</sup>H} NMR (100 MHz, CDCl<sub>3</sub>): δ 151.9 (d, *J*<sub>C-F</sub> = 12.8 Hz), 150.9 (d, *J*<sub>C-F</sub> = 12.8 Hz), 149.4 (d, *J*<sub>C-F</sub> = 12.8 Hz), 148.4 (d, *J*<sub>C-F</sub> = 12.7 Hz), 145.2, 139.5 (t, *J*<sub>C-F</sub> = 4.0 Hz), 133.9, 129.24 (d, *J*<sub>C-F</sub> = 42.1 Hz), 128.5, 128.0, 123.0, 122.2 (dd, *J*<sub>C-F</sub> = 6.4, 3.5 Hz), 117.7 (d, *J*<sub>C-F</sub> = 17.4 Hz), 115.2 (d, *J*<sub>C-F</sub> = 17.8 Hz), 114.9, 57.1, 36.2.

<sup>19</sup>F NMR (376 MHz, CDCl<sub>3</sub>): δ -136.51 (d, *J* = 21.4 Hz), -138.94 (d, *J* = 21.4 Hz).

HRMS: *m/z* [M + H]<sup>+</sup> calcd for C<sub>20</sub>H<sub>17</sub>ClF<sub>2</sub>NSe, 424.0177; found, 424.0183.

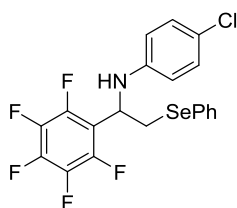

**4-Chloro-N-(1-(perfluorophenyl)-2-(phenylselanyl)ethyl)aniline (5g).** Compound **5g** was prepared according to the general procedure and isolated as an oil (69 mg, 72% yield) after flash chromatography (petroleum ether/ethyl acetate = 50/1).

<sup>1</sup>H NMR (400 MHz, CDCl<sub>3</sub>): δ 7.45 – 7.33 (m, 2H), 7.26 – 7.08 (m, 3H), 7.00 (d, *J* = 8.8 Hz, 2H), 6.36 (d, *J* = 8.8 Hz, 2H), 4.92 (dd, *J* = 8.5, 6.6 Hz, 1H), 4.15 (brs, 1H), 3.38 (dd, *J* = 12.8, 6.5 Hz, 1H), 3.23 (dd, *J* = 12.9, 8.4 Hz, 1H).

<sup>13</sup>C{<sup>1</sup>H} NMR (100 MHz, CDCl<sub>3</sub>): δ 144.1, 133.6, 129.4, 129.2, 128.4, 127.9, 123.8, 114.5, 50.3, 31.4.

<sup>19</sup>F NMR (376 MHz, CDCl<sub>3</sub>): δ -143.67 (dd, *J* = 23.1, 8.0 Hz), -154.42 (t, *J* = 21.0 Hz), -161.33 (td, *J* = 22.6, 8.2 Hz).

HRMS: *m/z* [M + H]<sup>+</sup> calcd for C<sub>20</sub>H<sub>14</sub>ClF<sub>5</sub>NSe, 477.9895; found, 477.9884.

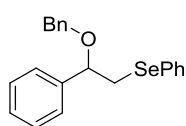

**(2-(Benzyloxy)-2-phenylethyl)(phenyl)selane (6a).** Compound **6a** was prepared according to the general procedure and isolated as an oil (63 mg, 85% yield) after flash chromatography (petroleum ether/ethyl acetate = 80/1).

<sup>1</sup>H NMR (400 MHz, CDCl<sub>3</sub>): δ 7.46 – 7.40 (m, 2H), 7.38 – 7.33 (m, 4H), 7.33 – 7.24 (m, 6H), 7.22 – 7.15 (m, 3H), 4.56 (dd, *J* = 8.5, 5.0 Hz, 1H), 4.48 (d, *J* = 11.8 Hz, 1H), 4.29 (d, *J* = 11.7 Hz, 1H), 3.39 (dd, *J* = 12.3, 8.5 Hz, 1H), 3.12 (dd, *J* = 12.3, 5.0 Hz,

1H).

$^{13}\text{C}\{^1\text{H}\}$  NMR (100 MHz,  $\text{CDCl}_3$ ):  $\delta$  141.1, 138.1, 132.5, 130.9, 129.1, 128.7, 128.4, 128.2, 127.9, 127.7, 126.9, 126.8, 80.8, 70.9, 35.6.

Spectral data are in agreement with literature values<sup>[4]</sup>.

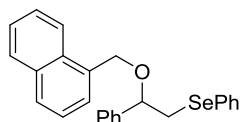

**(2-(Naphthalen-1-ylmethoxy)-2-phenylethyl)(phenyl)selane (6b).** Compound **6b** was prepared according to the general procedure and isolated as an oil (75 mg, 90% yield) after flash chromatography (petroleum ether/ethyl acetate = 60/1).

$^1\text{H}$  NMR (400 MHz,  $\text{CDCl}_3$ ):  $\delta$  8.00 (d,  $J = 7.4$  Hz, 1H), 7.76 (d,  $J = 7.7$  Hz, 1H), 7.74 – 7.61 (m, 1H), 7.44 – 7.37 (m, 2H), 7.36 – 7.20 (m, 9H), 7.15 – 7.05 (m, 3H), 4.84 (d,  $J = 11.7$  Hz, 1H), 4.64 (d,  $J = 11.7$  Hz, 1H), 4.54 (dd,  $J = 8.4, 5.2$  Hz, 1H), 3.29 (dd,  $J = 12.4, 8.3$  Hz, 1H), 3.04 (dd,  $J = 12.3, 5.2$  Hz, 1H).

$^{13}\text{C}\{^1\text{H}\}$  NMR (100 MHz,  $\text{CDCl}_3$ ):  $\delta$  141.1, 133.8, 133.5, 132.5, 131.8, 130.8, 129.0, 128.7, 128.6, 128.5, 128.3, 127.0, 126.7, 126.6, 126.2, 125.8, 125.2, 124.4, 80.9, 69.3, 35.5.

HRMS:  $m/z$   $[\text{M} + \text{H}]^+$  calcd for  $\text{C}_{25}\text{H}_{23}\text{OSe}$ , 419.0909; found, 419.0912.

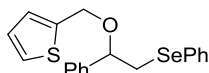

**2-((1-Phenyl-2-(phenylselanyl)ethoxy)methyl)thiophene (6c).**

Compound **6c** was prepared according to the general procedure and isolated as an oil (63 mg, 84% yield) after flash chromatography (petroleum ether/ethyl acetate = 90/1).

$^1\text{H}$  NMR (400 MHz,  $\text{CDCl}_3$ ):  $\delta$  7.37 – 7.34 (m, 2H), 7.32 – 7.26 (m, 5H), 7.21 – 7.07 (m, 5H), 6.76 (d,  $J = 3.5$  Hz, 1H), 4.59 – 4.43 (m, 2H), 4.36 (d,  $J = 12.5$  Hz, 1H), 3.29 (dd,  $J = 12.3, 8.3$  Hz, 1H), 3.03 (dd,  $J = 12.3, 5.2$  Hz, 1H).

$^{13}\text{C}\{^1\text{H}\}$  NMR (100 MHz,  $\text{CDCl}_3$ ):  $\delta$  147.5, 140.5, 136.6, 132.5, 130.6, 129.2, 129.0, 128.7, 128.3, 127.3, 126.9, 126.8, 80.6, 65.4, 35.2.

HRMS:  $m/z$   $[\text{M} + \text{H}]^+$  calcd for  $\text{C}_{19}\text{H}_{19}\text{OSSe}$ , 375.0316; found, 375.0312.

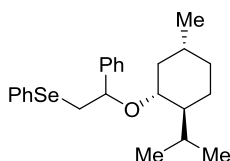

**(2-(((1R,2S,5R)-2-Isopropyl-5-methylcyclohexyl)oxy))-2-phenylethyl(phenyl)selane (6d).** Compound **6d** was prepared according to the general procedure and isolated as a white solid (71 mg, 86% yield) after flash chromatography (petroleum ether/ethyl acetate = 50/1).

The crude NMR indicated the presence of mixture of diastereomers (dr = 1.8:1).

$^1\text{H}$  NMR (400 MHz,  $\text{CDCl}_3$ ):  $\delta$  7.43 – 7.31 (m, 4H, both diastereomers), 7.31 – 7.02 (m, 16H, both diastereomers), 4.56 (dd,  $J = 8.3, 5.4$  Hz, 1H, major diastereomer), 4.44 (t,  $J = 6.6$  Hz, 1H, minor diastereomer), 3.30 (dd,  $J = 12.1, 8.4$  Hz, 2H, both diastereomers), 3.12 – 2.99 (m, 3H, both diastereomers), 2.83 (td,  $J = 10.5, 4.2$  Hz, 1H, major diastereomer), 2.39 – 2.31 (m, 1H, minor diastereomer), 2.19 – 2.12 (m, 1H, major diastereomer), 2.11 – 2.00 (m, 1H, major diastereomer), 1.58 – 1.46 (m, 6H, both diastereomers), 1.27 – 1.07 (m, 5H, both diastereomers), 0.93 – 0.57 (m, 19H, both diastereomers), 0.16 (d,  $J = 6.9$  Hz, 3H, major diastereomer).

$^{13}\text{C}\{^1\text{H}\}$  NMR (100 MHz,  $\text{CDCl}_3$ ):  $\delta$  143.0, 141.7, 132.3, 132.3, 131.2, 131.0, 129.0,

128.9, 128.3, 128.2, 128.0, 127.8, 127.4, 126.9, 126.7, 126.5, 80.9, 79.3, 77.6, 75.4, 49.2, 48.3, 42.3, 40.0, 35.5, 35.4, 34.5, 34.3, 31.6, 31.4, 25.2, 24.8, 23.0, 22.7, 22.4, 22.2, 21.4, 21.3, 16.2, 15.3.

Spectral data are in agreement with literature values<sup>[4]</sup>.

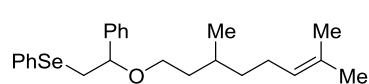

**(2-((3,7-Dimethyloct-6-en-1-yl)oxy)-2-phenylethyl)phenylselane (6e).** Compound **6e** was prepared according to the general procedure and isolated as an

oil (66 mg, 80% yield) after flash chromatography (petroleum ether/ethyl acetate = 80/1).

**<sup>1</sup>H NMR** (400 MHz, CDCl<sub>3</sub>): δ 7.40 (d, *J* = 7.0 Hz, 2H), 7.32 – 7.20 (m, 5H), 7.20 – 7.06 (m, 3H), 5.01 (q, *J* = 7.6 Hz, 1H), 4.37 (ddd, *J* = 8.8, 4.9, 2.0 Hz, 1H), 3.45 – 3.18 (m, 3H), 3.00 (dd, *J* = 12.2, 4.8 Hz, 1H), 1.87 (tt, *J* = 14.4, 8.2 Hz, 2H), 1.61 (s, 3H), 1.55 – 1.48 (m, 5H), 1.36 – 1.14 (m, 2H), 1.09 – 0.96 (m, 1H), 0.78 (d, *J* = 6.3 Hz, 3H).

**<sup>13</sup>C{<sup>1</sup>H} NMR** (100 MHz, CDCl<sub>3</sub>): δ 140.7, 131.4, 130.1, 130.0, 127.9, 127.4, 126.9, 125.6, 125.6, 123.8, 80.8, 66.6, 36.1, 35.8, 34.6, 28.4, 24.7, 24.5, 18.5, 16.6.

**HRMS:** *m/z* [M + H]<sup>+</sup> calcd for C<sub>24</sub>H<sub>33</sub>OSe, 417.1691; found, 417.1683.

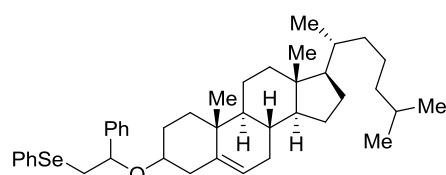

**(2-(((8S,9S,10R,13R,14S,17R)-10,13-Dimethyl-17-((R)-6-methylheptan-2-yl)-2,3,4,7,8,9,10,11,12,13,14,15,16,17-tetradecahydro-1H-cyclopenta[a]phenanthren-3-yl)oxy)-2-phenylethyl)phenylselane (6f).** Compound **6f** was prepared according to the general procedure and isolated as an oil (106 mg, 82% yield) after

flash chromatography (petroleum ether/ethyl acetate = 70/1).

The crude NMR indicated the presence of mixture of diastereomers (dr = 1.07:1).

**<sup>1</sup>H NMR** (400 MHz, CDCl<sub>3</sub>): δ 7.45 – 7.37 (m, 4H, both diastereomers), 7.36 – 7.11 (m, 16H, both diastereomers), 5.23 (d, *J* = 5.0 Hz, 1H, major diastereomer), 5.12 (d, *J* = 4.9 Hz, 1H, minor diastereomer), 4.58 (dt, *J* = 8.9, 4.4 Hz, 2H, both diastereomers), 3.24 (dd, *J* = 12.1, 9.0 Hz, 2H, major diastereomer), 3.06 – 2.97 (m, 4H, both diastereomers), 2.34 (dd, *J* = 13.2, 4.8 Hz, 1H, major diastereomer), 2.19 (t, *J* = 12.3 Hz, 2H, major diastereomer), 2.03 (dd, *J* = 13.4, 5.0, 1H, major diastereomer), 1.94 – 1.80 (m, 5H, both diastereomers), 1.78 – 1.63 (m, 4H, both diastereomers), 1.59 – 1.15 (m, 26H, both diastereomers), 1.11 – 0.67 (m, 41H, both diastereomers), 0.58 (m, 6H, both diastereomers),

**<sup>13</sup>C{<sup>1</sup>H} NMR** (100 MHz, CDCl<sub>3</sub>): δ 141.5, 141.4, 139.9, 139.8, 131.3, 131.3, 130.1, 130.0, 127.9, 127.4, 127.4, 126.8, 126.7, 125.6, 125.5, 125.4, 120.5, 120.4, 77.8, 77.6, 55.7, 55.1, 49.1, 49.0, 41.3, 39.0, 38.7, 38.5, 37.6, 36.2, 36.0, 35.8, 35.2, 35.1, 35.0, 34.7, 30.9, 30.8, 30.8, 28.4, 27.2, 27.0, 26.8, 23.2, 22.8, 21.8, 21.5, 20.0, 20.0, 18.4, 18.4, 17.7, 10.8.

Spectral data are in agreement with literature values<sup>[4]</sup>.

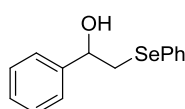

**1-Phenyl-2-(phenylselanyl)ethan-1-ol (7a).** Compound **7a** was

prepared according to the general procedure and isolated as an oil (45 mg, 82% yield) after flash chromatography (petroleum ether/ethyl acetate = 15/1).

$^1\text{H NMR}$  (400 MHz,  $\text{CDCl}_3$ ):  $\delta$  7.8 – 7.45 (m, 2H), 7.26 – 7.23 (m, 4H), 7.23 – 7.16 (m, 4H), 4.66 (dd,  $J = 9.4, 3.7$  Hz, 1H), 3.22 (dd,  $J = 12.8, 3.7$  Hz, 1H), 3.06 (dd,  $J = 12.8, 9.4$  Hz, 1H), 2.75 (brs, 1H).

$^{13}\text{C}\{^1\text{H}\}$  NMR (100 MHz,  $\text{CDCl}_3$ ):  $\delta$  141.4, 132.1, 128.2, 128.1, 127.5, 126.9, 126.4, 124.76, 71.2, 37.4.

Spectral data are in agreement with literature values<sup>[5]</sup>.

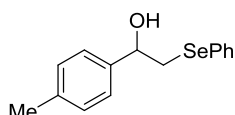

**2-(Phenylselanyl)-1-(p-tolyl)ethan-1-ol (7b).** Compound **7b** was prepared according to the general procedure and isolated as an oil (42 mg, 72% yield) after flash chromatography (petroleum ether/ethyl acetate = 18/1).

$^1\text{H NMR}$  (400 MHz,  $\text{CDCl}_3$ ):  $\delta$  7.46 – 7.44 (m, 2H), 7.23 – 7.17 (m, 3H), 7.16 – 7.10 (m, 2H), 7.05 (d,  $J = 7.7$  Hz, 2H), 4.63 (dt,  $J = 8.9, 3.0$  Hz, 1H), 3.19 (dd,  $J = 12.7, 3.9$  Hz, 1H), 3.05 (dd,  $J = 12.7, 9.2$  Hz, 1H), 2.76 (d,  $J = 2.6$  Hz, 1H), 2.25 (s, 3H).

$^{13}\text{C}\{^1\text{H}\}$  NMR (100 MHz,  $\text{CDCl}_3$ ):  $\delta$  138.5, 136.6, 132.0, 128.2, 128.15, 128.13, 126.3, 124.7, 71.0, 37.3, 20.1.

Spectral data are in agreement with literature values<sup>[5]</sup>.

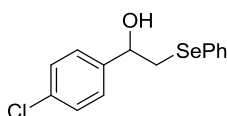

**1-(4-Chlorophenyl)-2-(phenylselanyl)ethan-1-ol (7c).**

Compound **7c** was prepared according to the general procedure and isolated as an oil (47 mg, 76% yield) after flash chromatography (petroleum ether/ethyl acetate = 20/1).

$^1\text{H NMR}$  (400 MHz,  $\text{CDCl}_3$ ):  $\delta$  7.65 – 7.29 (m, 2H), 7.30 – 7.00 (m, 7H), 4.60 (dt,  $J = 9.2, 3.1$  Hz, 1H), 3.16 (dd,  $J = 12.8, 3.8$  Hz, 1H), 2.98 (dd,  $J = 12.8, 9.3$  Hz, 1H), 2.88 (d,  $J = 2.7$  Hz, 1H).

$^{13}\text{C}\{^1\text{H}\}$  NMR (100 MHz,  $\text{CDCl}_3$ ):  $\delta$  139.9, 132.5, 132.2, 128.3, 127.8, 127.6, 126.5, 126.2, 70.4, 37.3.

Spectral data are in agreement with literature values<sup>[5]</sup>.

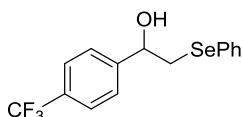

**2-(Phenylselanyl)-1-(4-(trifluoromethyl)phenyl)ethan-1-ol (7d).**

Compound **7d** was prepared according to the general procedure and isolated as an oil (48 mg, 70% yield) after flash chromatography (petroleum ether/ethyl acetate = 15/1).

$^1\text{H NMR}$  (400 MHz,  $\text{CDCl}_3$ ):  $\delta$  7.46 (d,  $J = 8.1$  Hz, 2H), 7.44 – 7.39 (m, 2H), 7.32 (d,  $J = 8.1$  Hz, 2H), 7.21 – 7.17 (m, 3H), 4.67 (dt,  $J = 9.2, 3.1$  Hz, 1H), 3.18 (dd,  $J = 12.9, 3.8$  Hz, 1H), 3.05 – 2.91 (m, 2H).

$^{13}\text{C}\{^1\text{H}\}$  NMR (100 MHz,  $\text{CDCl}_3$ ):  $\delta$  145.3, 132.2, 128.9 (q, C-F,  $^2J_{\text{C-F}} = 32.4$  Hz), 128.3, 127.6, 126.6, 125.1, 124.4 (q,  $^3J_{\text{C-F}} = 3.8$  Hz), 121.7 (q, C-F,  $^1J_{\text{C-F}} = 270.4$  Hz), 70.5, 37.3.

$^{19}\text{F NMR}$  (376 MHz,  $\text{CDCl}_3$ ):  $\delta$  -62.4.

Spectral data are in agreement with literature values<sup>[5]</sup>.

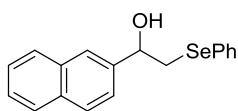

**1-(Naphthalen-2-yl)-2-(phenylselanyl)ethan-1-ol (7e).**

Compound **7e** was prepared according to the general procedure and isolated as a white solid (55 mg, 84% yield) after flash chromatography (petroleum ether/ethyl acetate = 17/1). mp = 52-53 °C.

<sup>1</sup>H NMR (400 MHz, CDCl<sub>3</sub>): δ 7.77 – 7.57 (m, 4H), 7.51 – 7.39 (m, 2H), 7.38 – 7.31 (m, 2H), 7.29 (dd, *J* = 8.5, 1.8 Hz, 1H), 7.20 – 7.09 (m, 3H), 4.77 (dt, *J* = 9.2, 3.1 Hz, 1H), 3.23 (dd, *J* = 12.8, 3.8 Hz, 1H), 3.08 (dd, *J* = 12.8, 9.3 Hz, 1H), 2.96 (d, *J* = 2.6 Hz, 1H).

<sup>13</sup>C{<sup>1</sup>H} NMR (100 MHz, CDCl<sub>3</sub>): δ 138.8, 132.1, 132.1, 132.0, 128.2, 128.1, 127.3, 126.9, 126.6, 126.3, 125.1, 124.9, 123.6, 122.7, 71.3 37.2.

Spectral data are in agreement with literature values<sup>[5]</sup>.

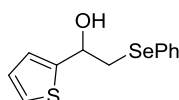

**2-(Phenylselanyl)-1-(thiophen-2-yl)ethan-1-ol (7t).**

Compound **7t** was prepared according to the general procedure and isolated as an oil (42 mg, 74% yield) after flash chromatography (petroleum ether/ethyl acetate = 15/1).

<sup>1</sup>H NMR (400 MHz, CDCl<sub>3</sub>): δ 7.48 – 7.40 (m, 2H), 7.26 – 7.06 (m, 4H), 6.92 – 6.81 (m, 2H), 4.91 (dt, *J* = 7.9, 3.6 Hz, 1H), 3.26 (dd, *J* = 12.8, 4.3 Hz, 1H), 3.16 (dd, *J* = 12.8, 8.6 Hz, 1H), 2.99 (d, *J* = 3.4 Hz, 1H).

<sup>13</sup>C{<sup>1</sup>H} NMR (100 MHz, CDCl<sub>3</sub>): δ 145.2, 132.1, 128.2, 128.0, 126.4, 125.7, 123.8, 123.0, 67.5, 37.1.

Spectral data are in agreement with literature values<sup>[5]</sup>.

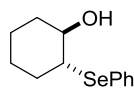

**anti-2-(Phenylselanyl)cyclohexan-1-ol (7g).**

Compound **7g** was prepared according to the general procedure and isolated as an oil (37 mg, 72% yield) after flash chromatography (petroleum ether/ethyl acetate = 20/1).

<sup>1</sup>H NMR (400 MHz, CDCl<sub>3</sub>): δ 7.60 – 7.43 (m, 2H), 7.31 – 7.12 (m, 3H), 3.25 (tdd, *J* = 10.3, 4.3, 1.4 Hz, 1H), 2.90 (s, 1H), 2.82 (ddd, *J* = 12.3, 10.0, 4.0 Hz, 1H), 2.23 – 1.96 (m, 1H), 1.67 – 1.62 (m, 1H), 1.58– 1.52 (m, 1H), 1.44 – 1.02 (m, 5H).

<sup>13</sup>C{<sup>1</sup>H} NMR (100 MHz, CDCl<sub>3</sub>): δ 135.1, 128.0, 127.1, 125.5, 71.2, 52.5, 32.8, 32.3, 25.8, 23.4.

Spectral data are in agreement with literature values<sup>[5]</sup>.

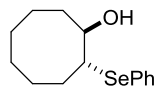

**anti-2-(Phenylselanyl)cyclooctan-1-ol (7h).**

Compound **7h** was prepared according to the general procedure and isolated as an oil (38 mg, 68% yield) after flash chromatography (petroleum ether/ethyl acetate = 30/1).

<sup>1</sup>H NMR (400 MHz, CDCl<sub>3</sub>): δ 7.60 – 7.41 (m, 2H), 7.27 – 7.12 (m, 3H), 3.61 (dd, *J* = 10.1, 4.6 Hz, 1H), 3.24 (ddd, *J* = 10.4, 8.5, 2.7 Hz, 1H), 2.87 (s, 1H), 2.22 – 2.14 (m, 1H), 1.95 – 1.71 (m, 2H), 1.70 – 1.58 (m, 3H), 1.54 – 1.38 (m, 6H).

<sup>13</sup>C{<sup>1</sup>H} NMR (100 MHz, CDCl<sub>3</sub>): δ 134.4, 128.0, 126.9, 126.8, 72.6, 54.2, 30.9, 30.6, 25.8, 25.7, 24.2, 22.6.

Spectral data are in agreement with literature values<sup>[5]</sup>.



## 4. References

- [1] Wang, P.-F.; Yi, W.; Ling, Y.; Ming, L.; Liu, G.-Q.; Zhao, Y. Preparation of selenofunctionalized heterocycles via iodosobenzene-mediated intramolecular selenocyclizations of olefins with diselenides; *Chin. Chem. Lett.* **2021**, *32*, 2587-2591.
- [2] Kuang, M.; Li, H.; Zeng, Z.; Gao, H.; Zhou, Z.; Hong, X.; Yi, W.; Wang, S. Calcium(II)-Mediated Three-Component Selenofunctionalization of Alkenes under Mild Conditions; *Org. Lett.* **2023**, *25*, 8095-8099.
- [3] Huang, B.; Li, Y.; Yang, C.; Xia, W. Three-component aminoselenation of alkenes via visible-light enabled Fe-catalysis; *Green Chem.* **2020**, *22*, 2804-2809.
- [4] Zhang, Y.-Q.; Jiang, Y.-Q.; Wang, Y.-H.; Qi, C.; Ling, Y.; Zhang, Y.; Liu, G.-Q. Oxidative Three-Component Selenofunctionalization of Alkenes: Convenient Access to Vicinally Functionalized Selenides; *J. Org. Chem.* **2023**, *88*, 7431-7447.
- [5] Liang, Z.-P.; Yi, W.; Wang, P.-F.; Liu, G.-Q.; Ling, Y. Iodosobenzene-mediated three-component selenofunctionalization of olefins; *J. Org. Chem.* **2021**, *86*, 5292-5304.

## 5. Copies of NMR spectra

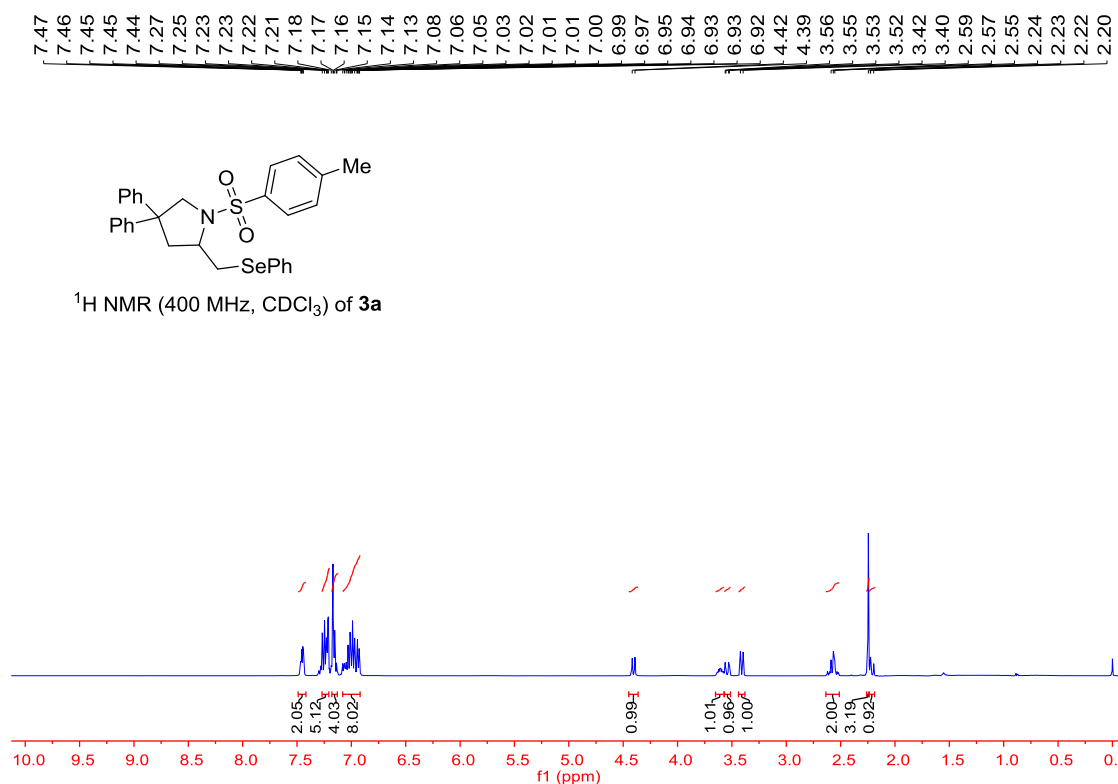

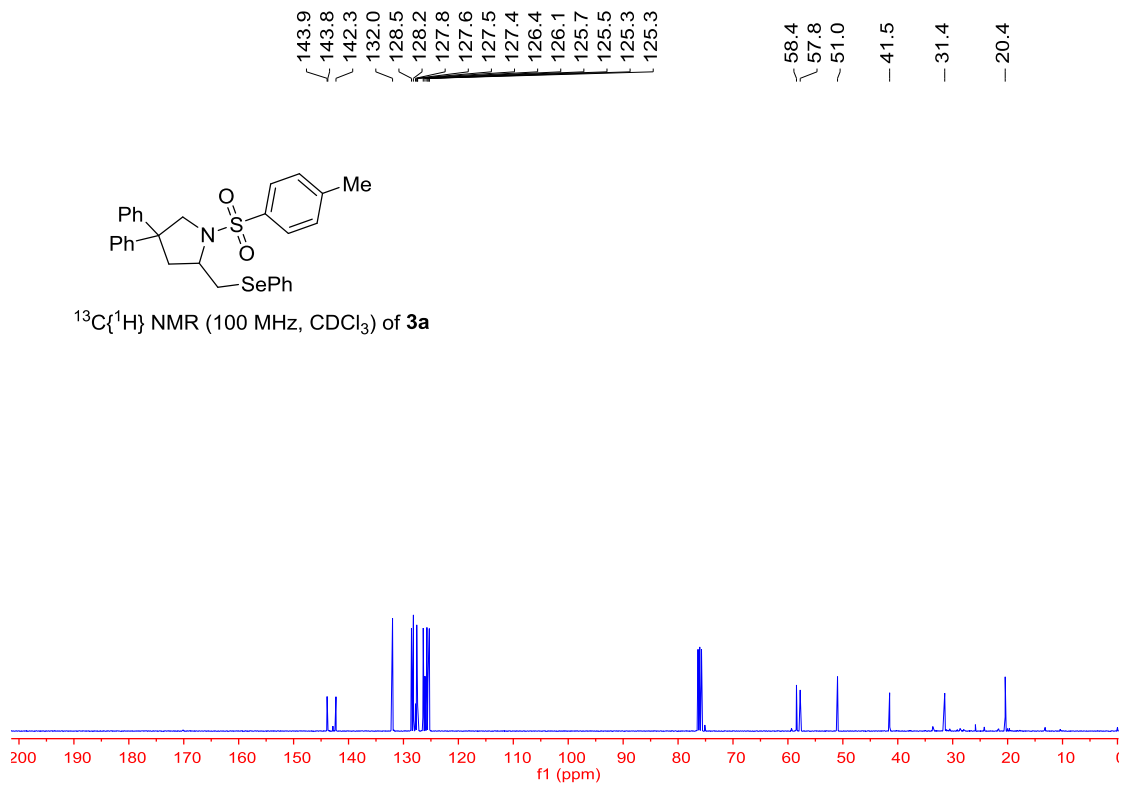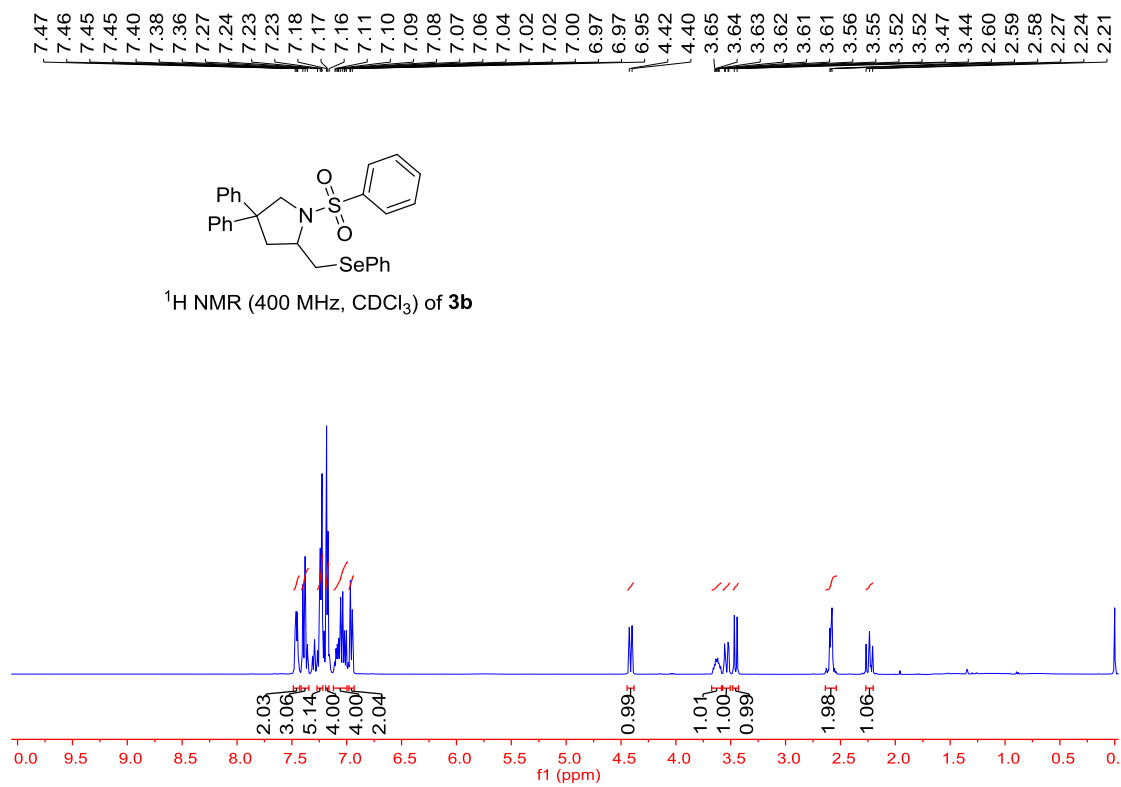

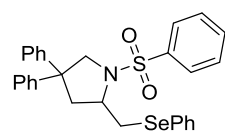

$^{13}\text{C}\{^1\text{H}\}$  NMR (100 MHz,  $\text{CDCl}_3$ ) of **3b**

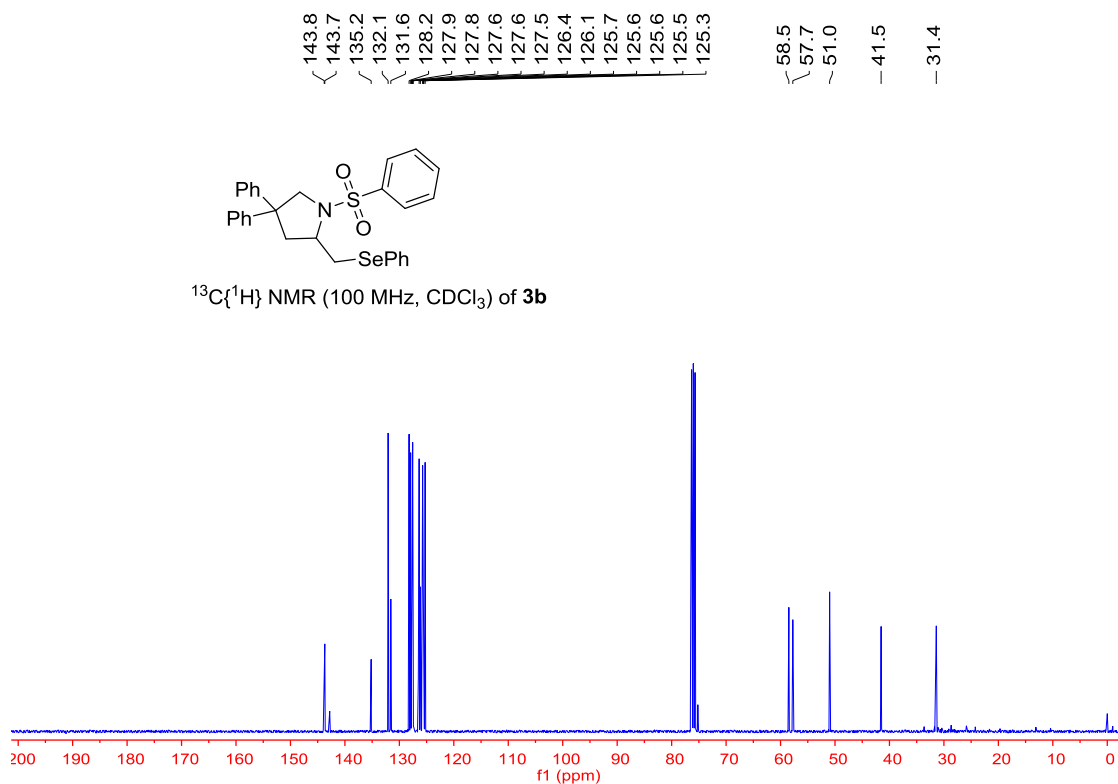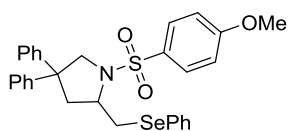

$^1\text{H}$  NMR (400 MHz,  $\text{CDCl}_3$ ) of **3c**

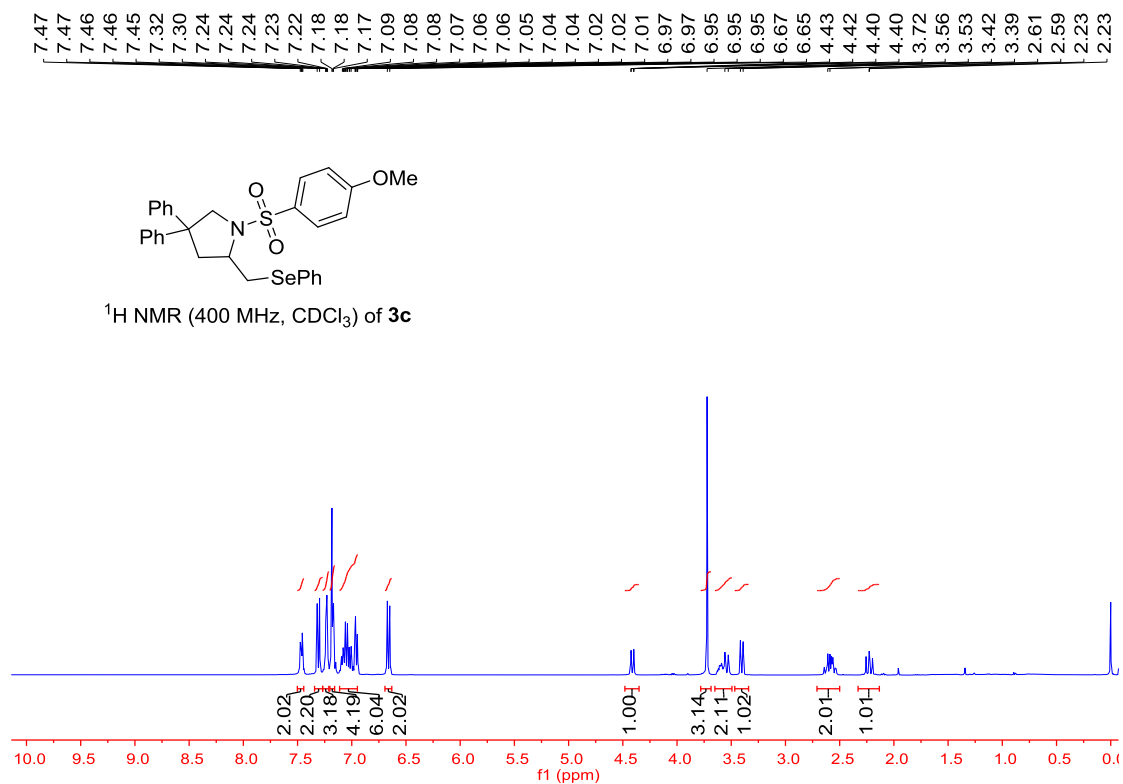

161.7  
 143.9  
 143.8  
 132.0  
 128.5  
 128.2  
 127.8  
 127.6  
 127.5  
 126.7  
 126.1  
 125.7  
 125.5  
 125.4  
 125.3  
 113.1  
 58.4  
 57.8  
 54.5  
 51.0  
 41.5  
 31.5

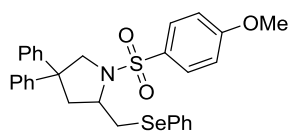

$^{13}\text{C}$   $\{^1\text{H}\}$  NMR (100 MHz,  $\text{CDCl}_3$ ) of **3c**

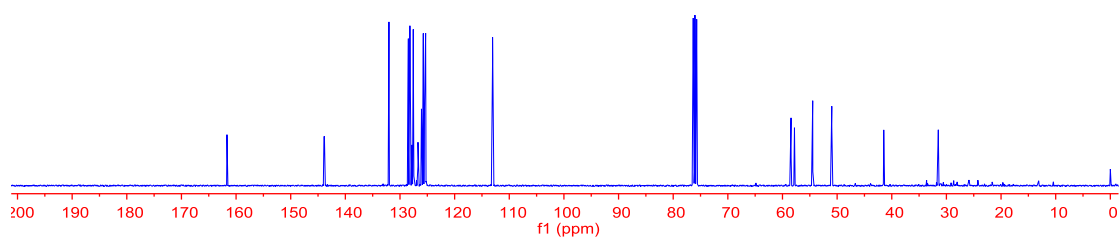

7.47  
 7.46  
 7.46  
 7.45  
 7.45  
 7.40  
 7.40  
 7.40  
 7.38  
 7.38  
 7.36  
 7.25  
 7.24  
 7.24  
 7.23  
 7.22  
 7.18  
 7.17  
 7.17  
 7.09  
 7.08  
 7.07  
 7.06  
 7.05  
 7.04  
 7.04  
 7.02  
 7.02  
 7.00  
 6.97  
 6.97  
 6.95  
 6.95  
 6.95  
 4.42  
 4.40  
 3.56  
 3.52  
 3.47  
 3.44  
 2.60  
 2.59  
 2.58  
 2.27  
 2.24  
 2.23

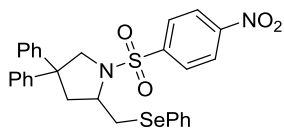

$^1\text{H}$  NMR (400 MHz,  $\text{CDCl}_3$ ) of **3d**

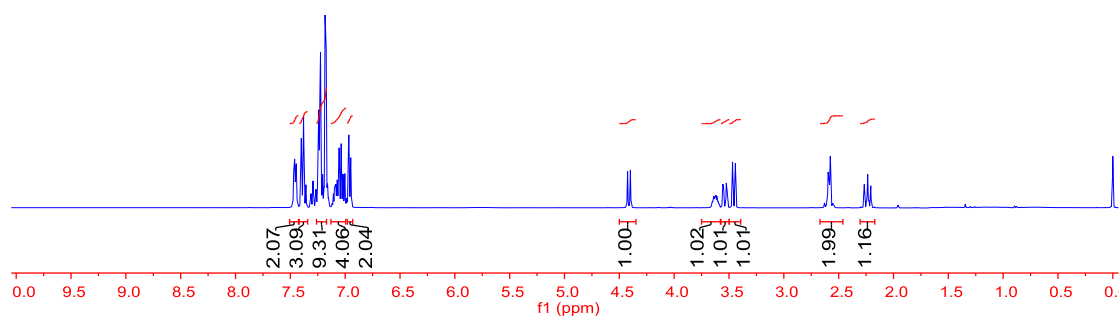

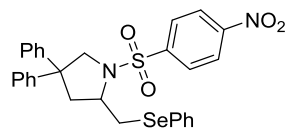

$^{13}\text{C} \{^1\text{H}\}$  NMR (100 MHz,  $\text{CDCl}_3$ ) of **3d**

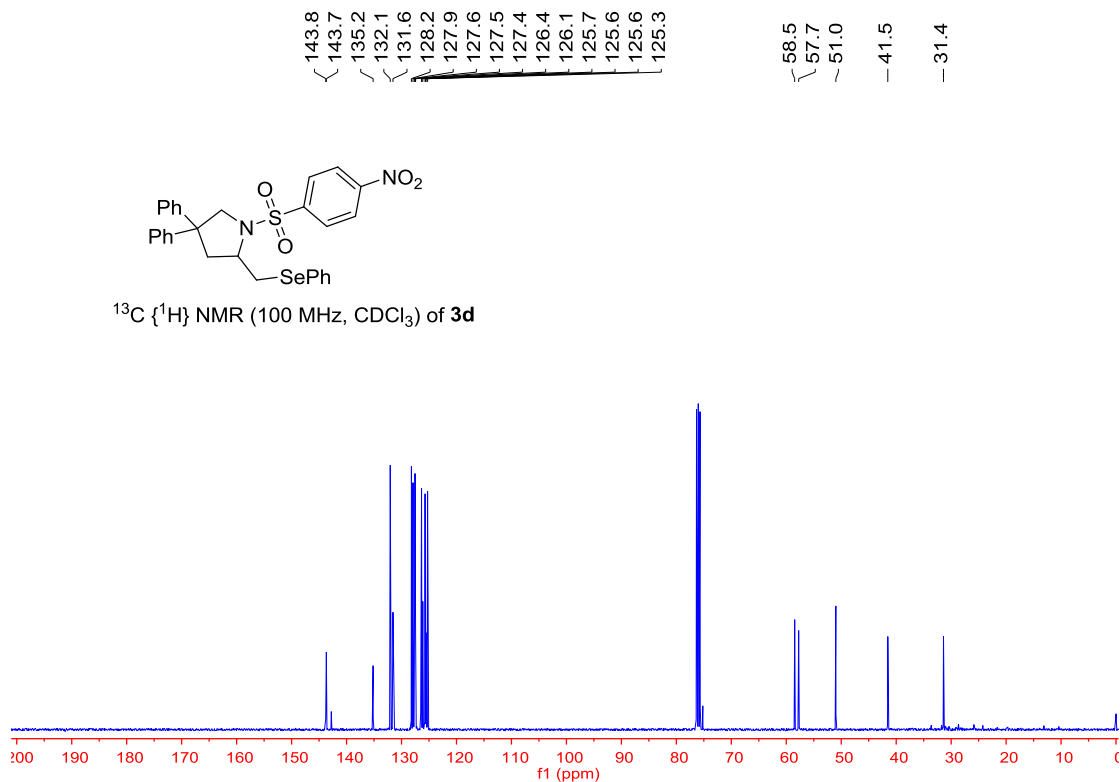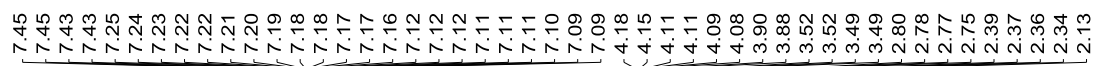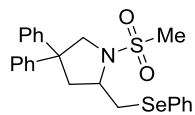

$^1\text{H}$  NMR (400 MHz,  $\text{CDCl}_3$ ) of **3e**

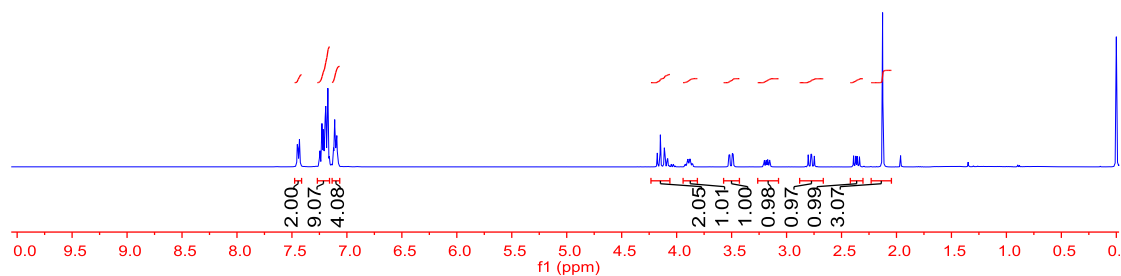

143.8  
143.2  
131.3  
128.3  
128.2  
127.9  
127.7  
126.0  
126.0  
125.8  
125.7  
125.4

59.0  
58.6  
52.1  
42.4  
34.7  
32.1

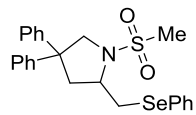

$^{13}\text{C}$   $\{^1\text{H}\}$  NMR (100 MHz,  $\text{CDCl}_3$ ) of **3e**

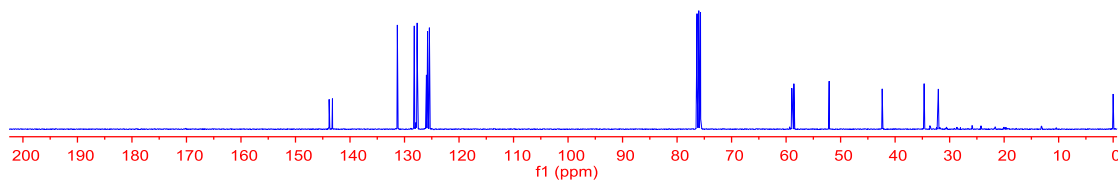

7.42  
7.42  
7.41  
7.40  
7.40  
7.26  
7.25  
7.24  
7.24  
7.23  
7.23  
7.21  
7.21  
7.20  
7.19  
7.19  
7.19  
7.19  
7.18  
7.17  
7.17  
7.16  
7.12  
7.11  
7.11  
7.11  
7.10  
7.09  
7.09  
7.09  
4.19  
4.19  
4.02  
4.00  
4.00  
3.45  
3.42  
3.42  
2.79  
2.54  
2.52  
2.49  
2.48  
2.47  
2.46  
1.12  
1.11  
1.09

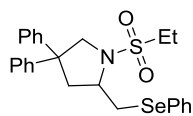

$^1\text{H}$  NMR (400 MHz,  $\text{CDCl}_3$ ) of **3f**

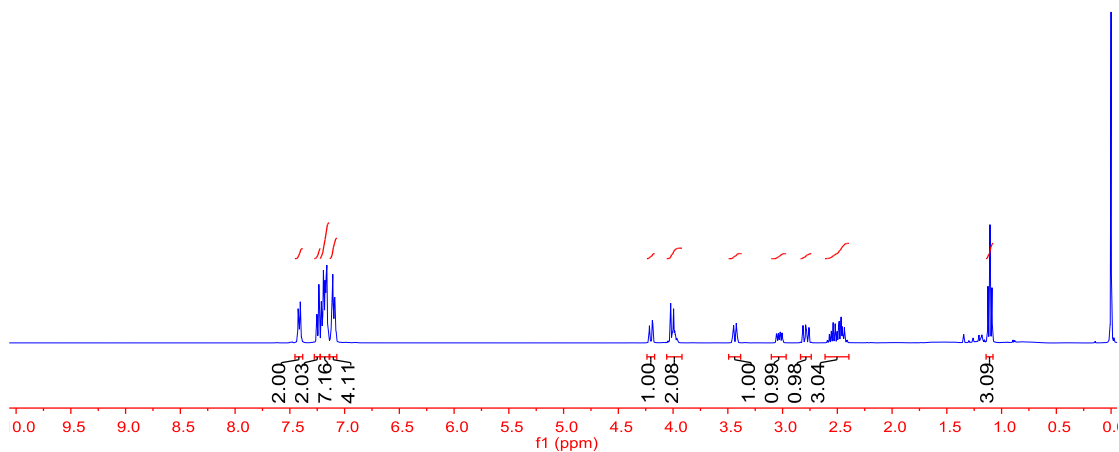

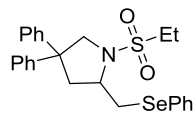

$^{13}\text{C}$   $\{^1\text{H}\}$  NMR (100 MHz,  $\text{CDCl}_3$ ) of **3f**

144.0  
143.2  
131.2  
128.5  
128.2  
127.7  
127.6  
125.9  
125.8  
125.7  
125.6  
125.5

58.4  
58.1  
52.0  
44.6  
42.5  
-31.9  
-6.9

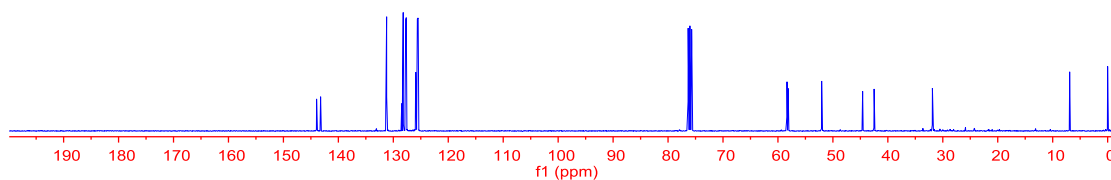

7.52  
7.52  
7.51  
7.50  
7.50  
7.43  
7.41  
7.26  
7.26  
7.25  
7.24  
7.24  
7.23  
7.23  
7.22  
7.14  
7.12  
3.78  
3.77  
3.74  
3.74  
3.60  
3.58  
3.16  
3.13  
2.99  
2.99  
2.96  
2.96  
2.92  
2.90  
2.89  
2.87  
2.31  
1.82  
1.80  
1.80  
1.79  
1.79  
1.77  
1.77  
1.54  
1.52  
1.50  
1.48  
0.95  
0.36

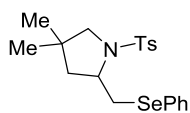

$^1\text{H}$  NMR (400 MHz,  $\text{CDCl}_3$ ) of **3g**

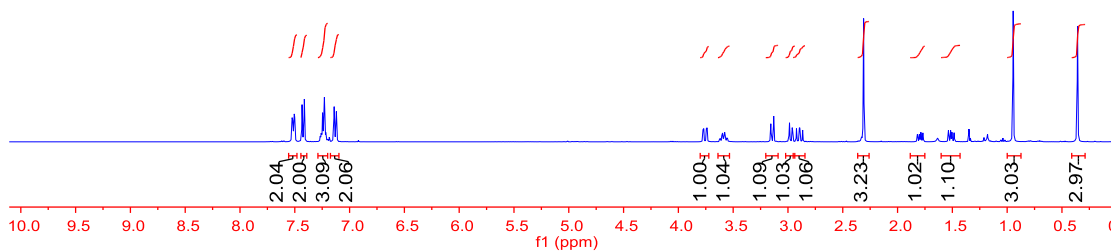

142.3  
133.1  
131.7  
128.5  
128.4  
128.2  
126.5

61.0  
58.9  
45.7  
36.2  
33.0  
25.4  
24.8  
20.5

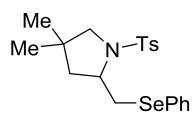

$^{13}\text{C}$   $\{^1\text{H}\}$  NMR (100 MHz,  $\text{CDCl}_3$ ) of **3g**

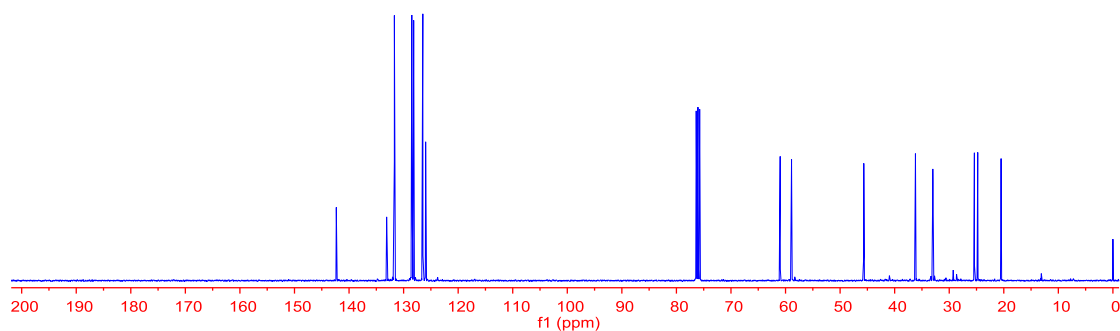

7.54  
7.53  
7.53  
7.52  
7.52  
7.51  
7.37  
7.35  
7.26  
7.26  
7.25  
7.15  
7.15  
7.13  
7.13  
4.02  
3.99  
3.68  
3.68  
3.67  
3.67  
3.65  
3.64  
3.64  
3.63  
3.38  
2.89  
2.86  
2.86  
2.83  
2.56  
2.54  
2.54  
2.53  
2.51  
2.35  
2.34  
2.33  
2.31  
2.29

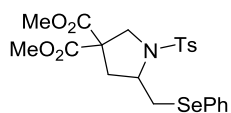

$^1\text{H}$  NMR (400 MHz,  $\text{CDCl}_3$ ) of **3h**

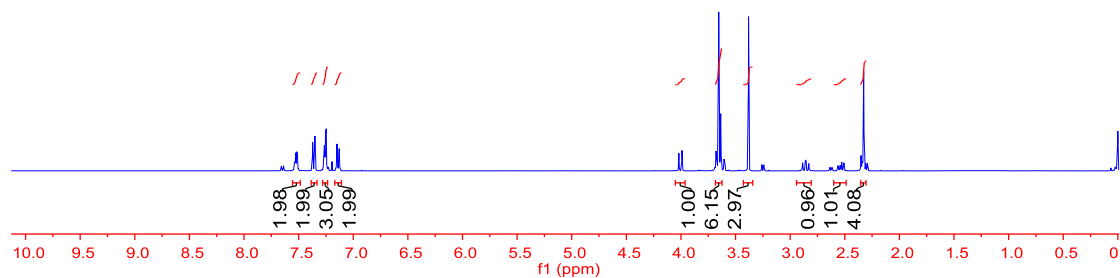



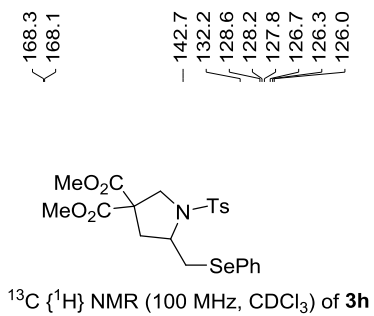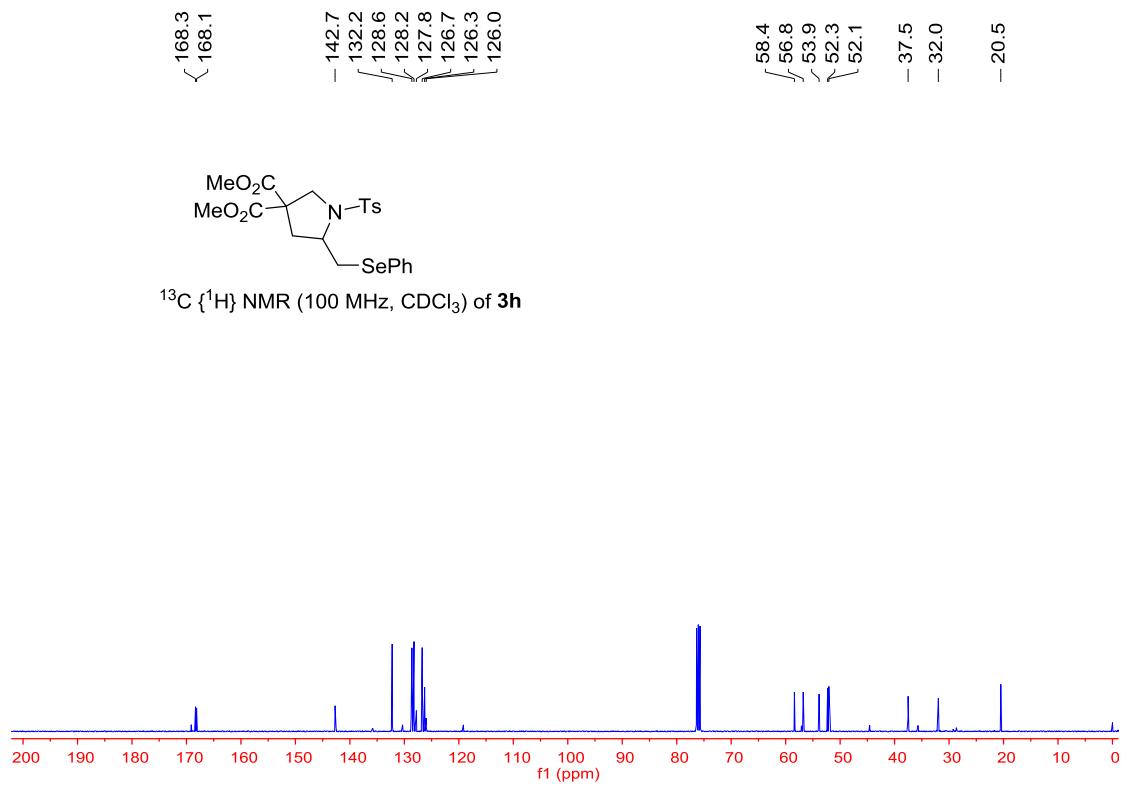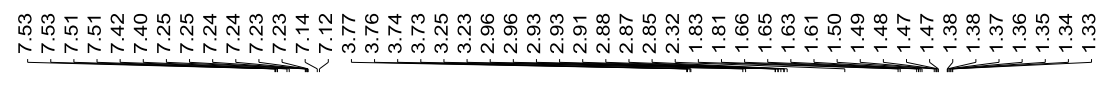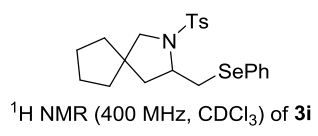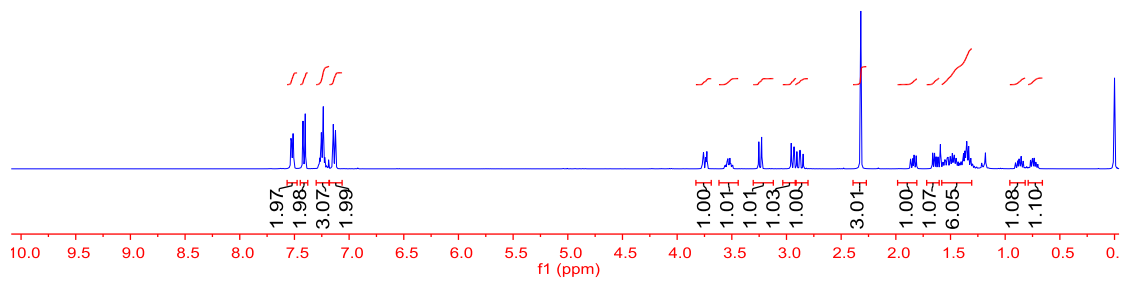

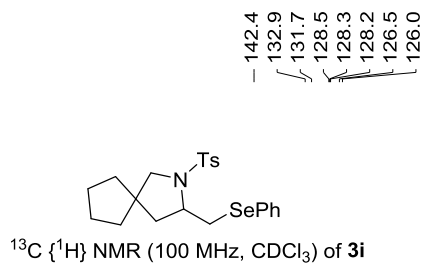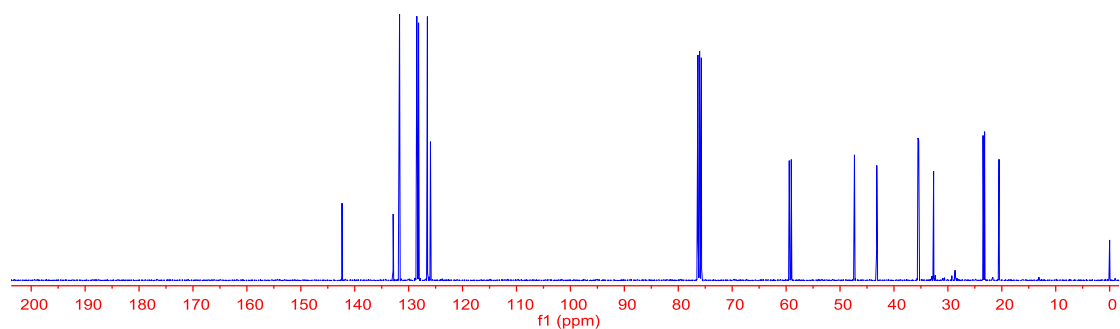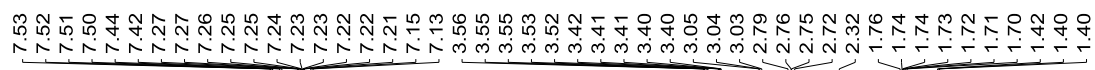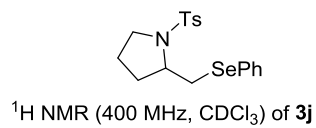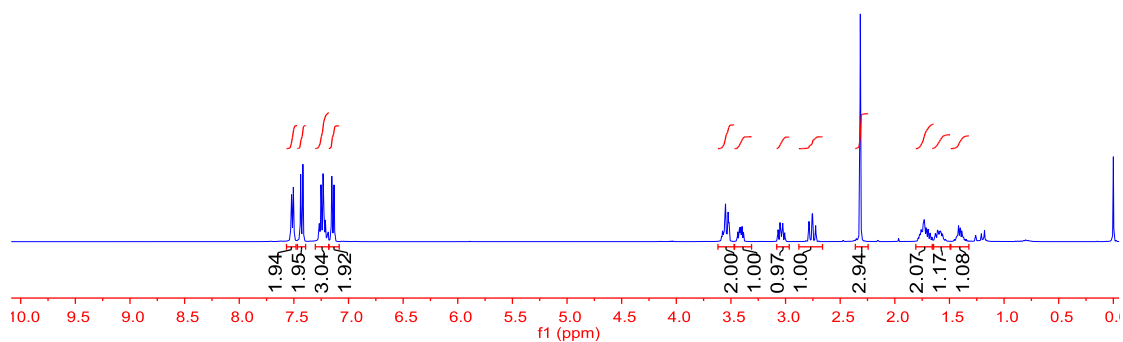

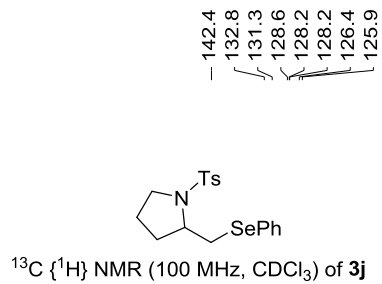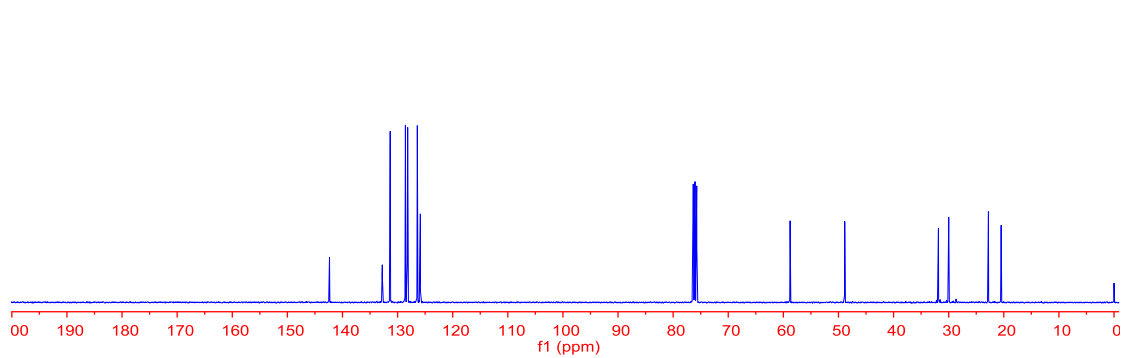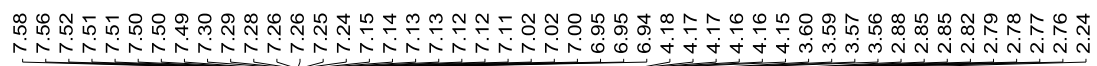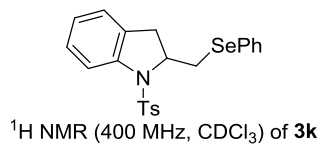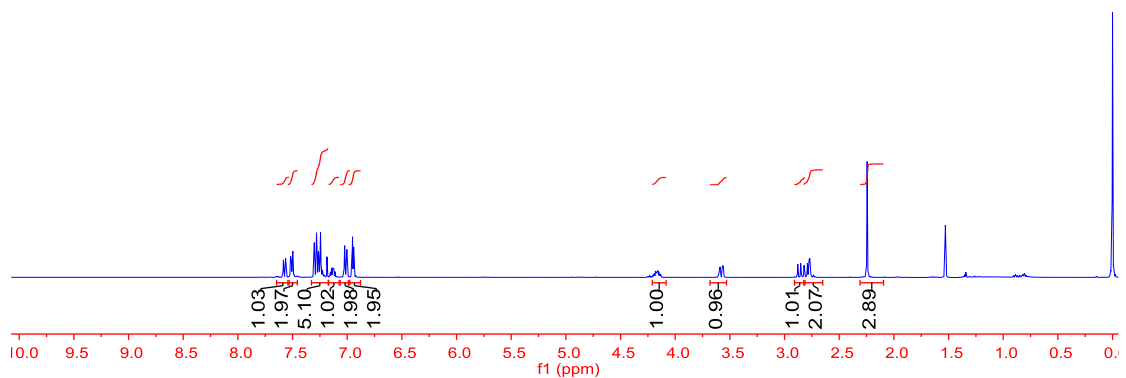

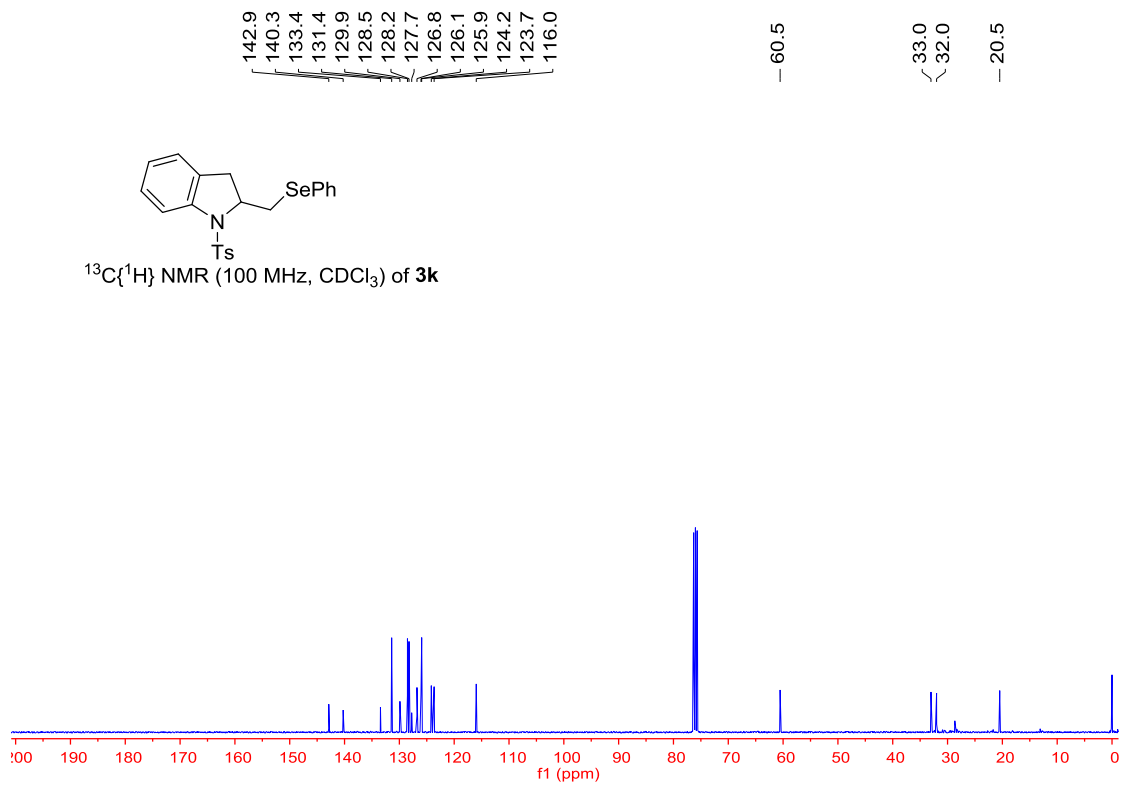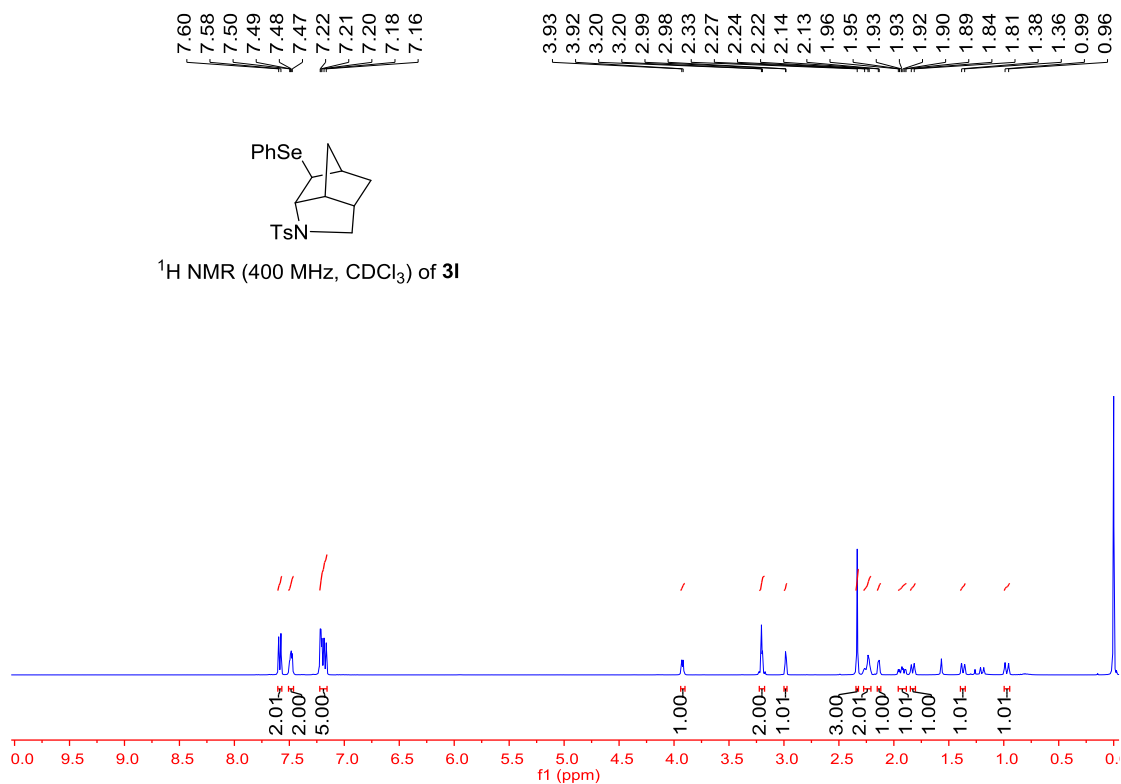

142.1  
135.0  
133.2  
128.8  
128.6  
128.0  
126.4  
126.1

- 66.4  
53.0  
52.4  
45.0  
40.2  
36.5  
36.3  
35.1  
-20.5

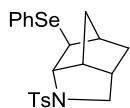

$^{13}\text{C}\{^1\text{H}\}$  NMR (100 MHz,  $\text{CDCl}_3$ ) of **3l**

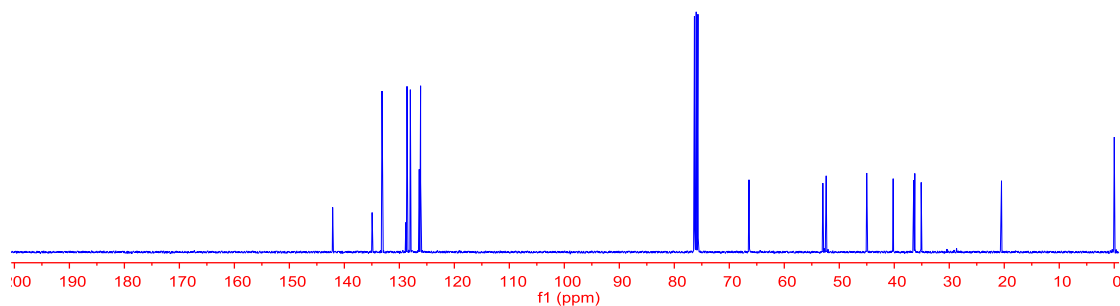

7.63  
7.63  
7.62  
7.61  
7.48  
7.48  
7.47  
7.46  
7.29  
7.28  
7.27  
7.26  
7.26  
7.25  
7.20  
7.19  
7.18  
7.17  
7.16  
4.36  
4.34  
4.32  
3.64  
3.61  
3.61  
3.07  
3.04  
2.33  
1.93  
1.91  
1.91  
1.89  
1.89  
1.21  
1.15  
1.06  
0.86

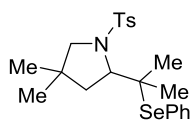

$^1\text{H}$  NMR (400 MHz,  $\text{CDCl}_3$ ) of **3m**

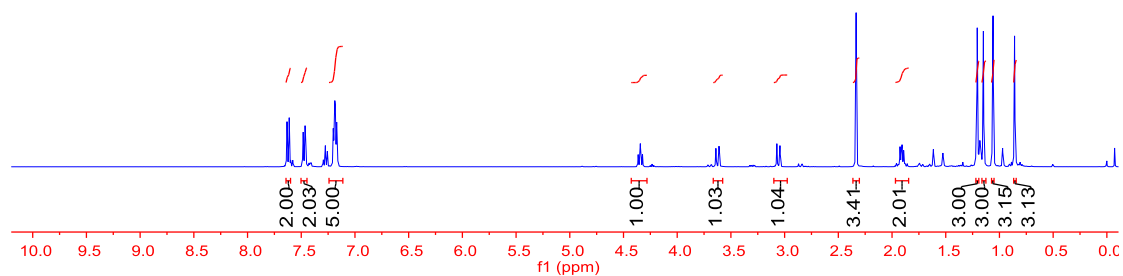

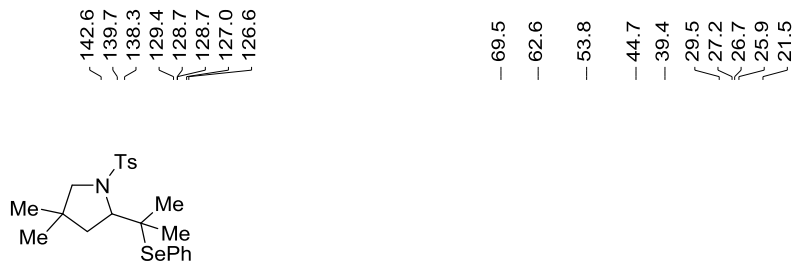

$^{13}\text{C}$  { $^1\text{H}$ } NMR (100 MHz,  $\text{CDCl}_3$ ) of **3m**

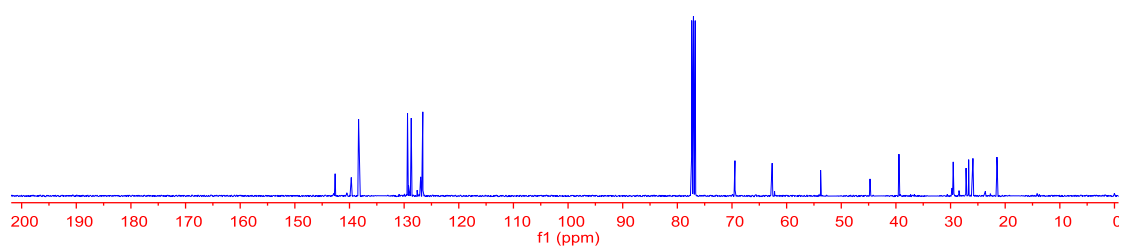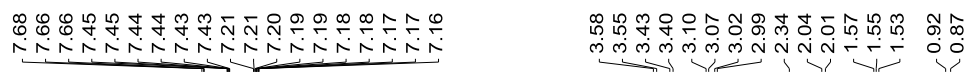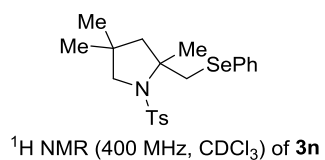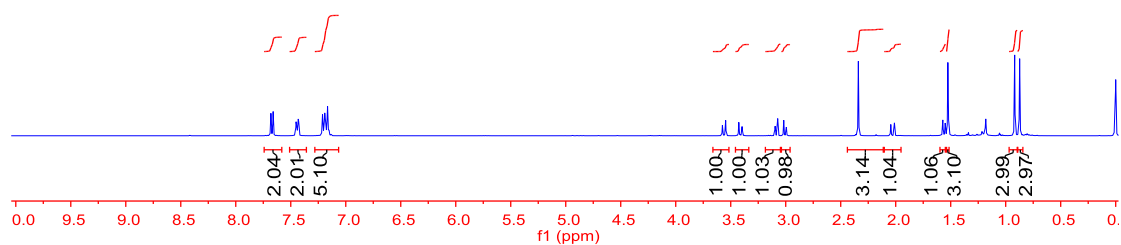

141.9  
136.8  
131.5  
130.1  
128.4  
128.1  
126.3  
125.8

68.1  
60.7  
52.7

40.5  
35.2  
26.5  
26.2  
26.0  
20.5

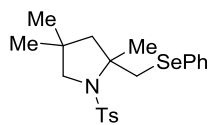

$^{13}\text{C}$   $\{^1\text{H}\}$  NMR (100 MHz,  $\text{CDCl}_3$ ) of **3n**

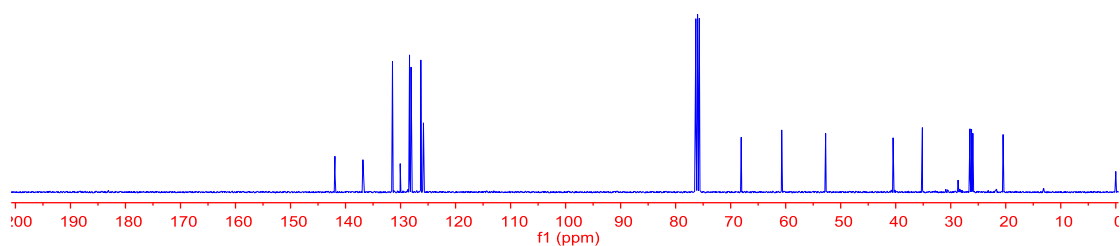

7.54  
7.52  
7.44  
7.43  
7.43  
7.43  
7.42  
7.41  
7.21  
7.21  
7.20  
7.20  
7.19  
7.16  
7.15  
7.14  
3.68  
3.04  
3.02  
3.01  
2.99  
2.94  
2.93  
2.93  
2.92  
2.91  
2.90  
2.90  
2.89  
2.86  
2.33  
1.86  
1.44  
1.43  
1.43  
1.40  
1.37  
1.36  
1.35  
1.34  
1.34  
1.34  
1.33  
1.22  
1.18

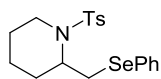

$^1\text{H}$  NMR (400 MHz,  $\text{CDCl}_3$ ) of **3o**

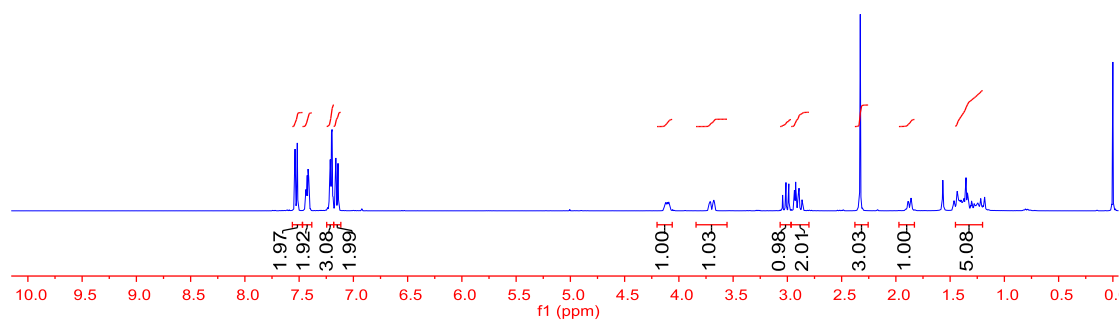

142.0  
137.1  
131.9  
128.6  
128.4  
128.1  
126.2  
125.9

- 51.6  
- 39.7  
26.2  
25.1  
23.6  
20.5  
17.0

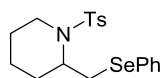

$^{13}\text{C}$   $\{^1\text{H}\}$  NMR (100 MHz,  $\text{CDCl}_3$ ) of **3o**

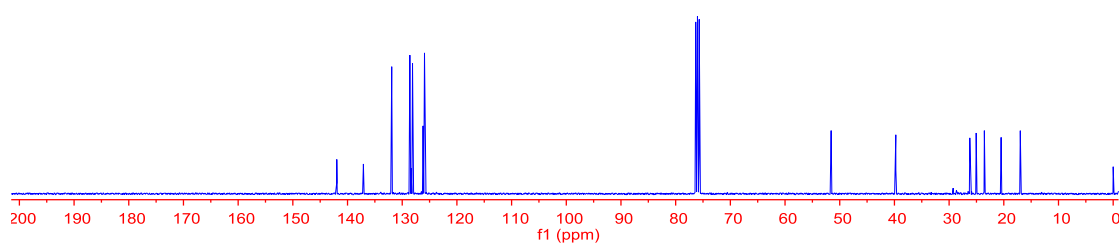

7.44  
7.43  
7.43  
7.42  
7.27  
7.27  
7.25  
7.24  
7.22  
7.22  
7.20  
7.19  
7.19  
7.18  
7.17  
7.16  
7.14  
7.00  
7.00  
6.98  
6.96  
6.96  
6.58  
6.37  
6.35  
4.38  
4.37  
4.37  
4.35  
3.28  
3.26  
3.25  
3.14  
3.12  
3.11  
3.09

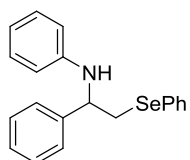

$^1\text{H}$  NMR (400 MHz,  $\text{CDCl}_3$ ) of **4a**

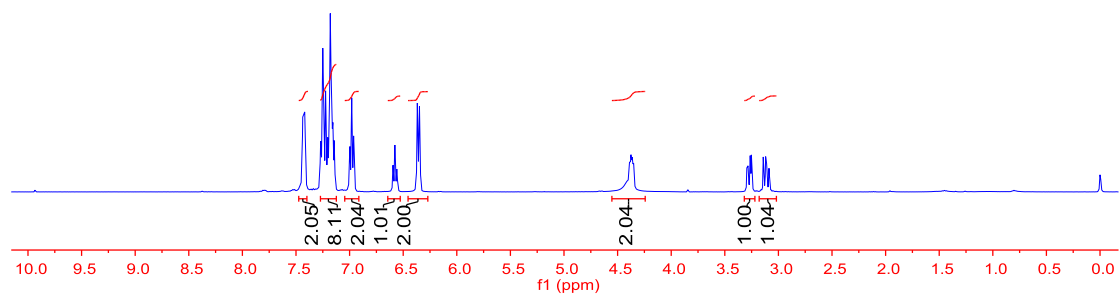



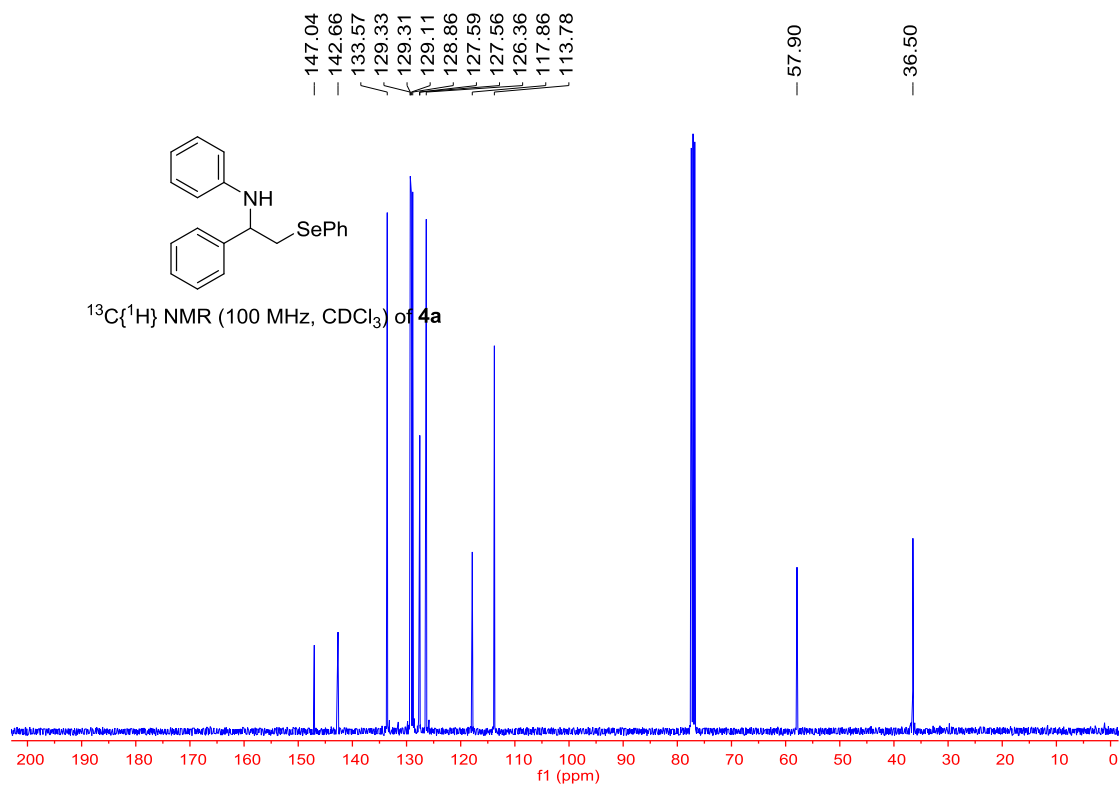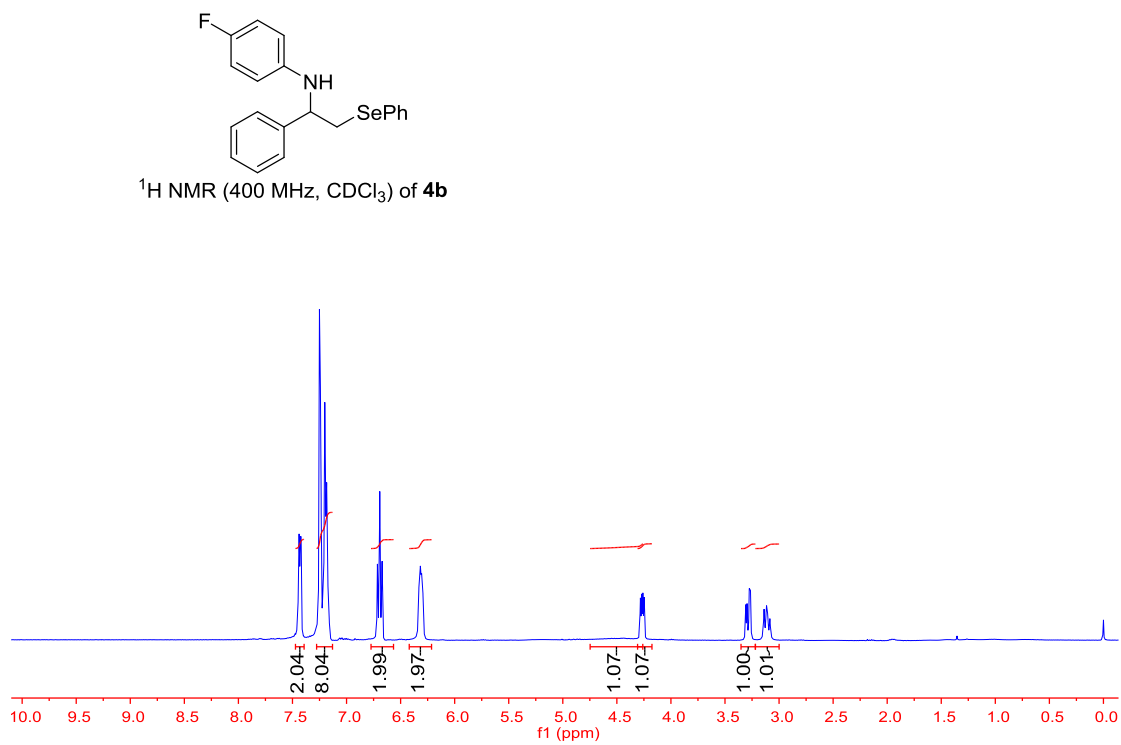

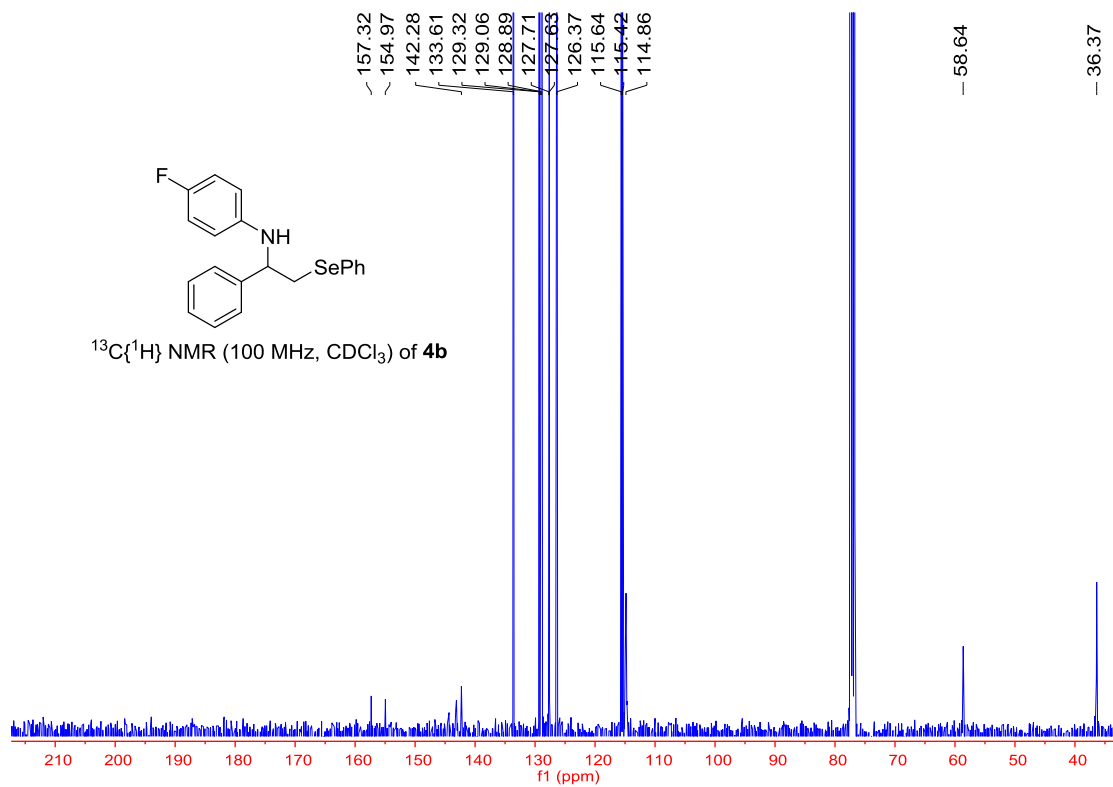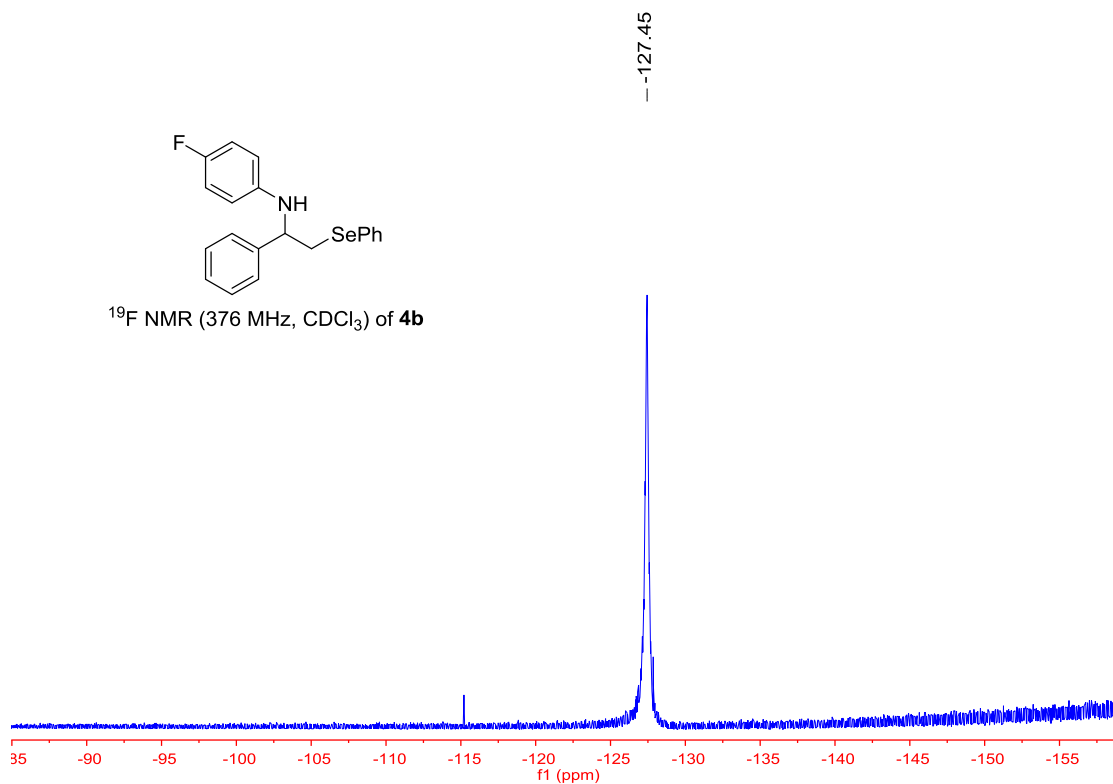

7.43  
7.43  
7.41  
7.41  
7.22  
7.22  
7.21  
7.19  
7.18  
7.18  
7.17  
7.17  
7.16  
6.91  
6.89  
6.26  
6.24

4.40  
4.39  
4.30  
4.29  
4.27  
4.26  
4.25  
3.27  
3.26  
3.24  
3.23  
3.08  
3.06  
3.05  
3.03

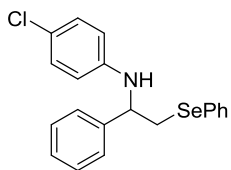

$^1\text{H}$  NMR (400 MHz,  $\text{CDCl}_3$ ) of **4c**

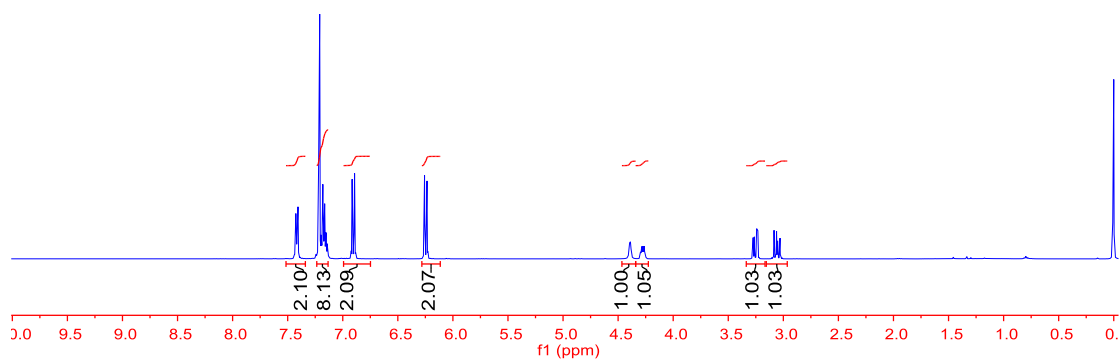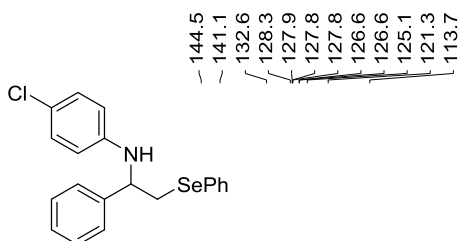

$^{13}\text{C}\{^1\text{H}\}$  NMR (100 MHz,  $\text{CDCl}_3$ ) of **4c**

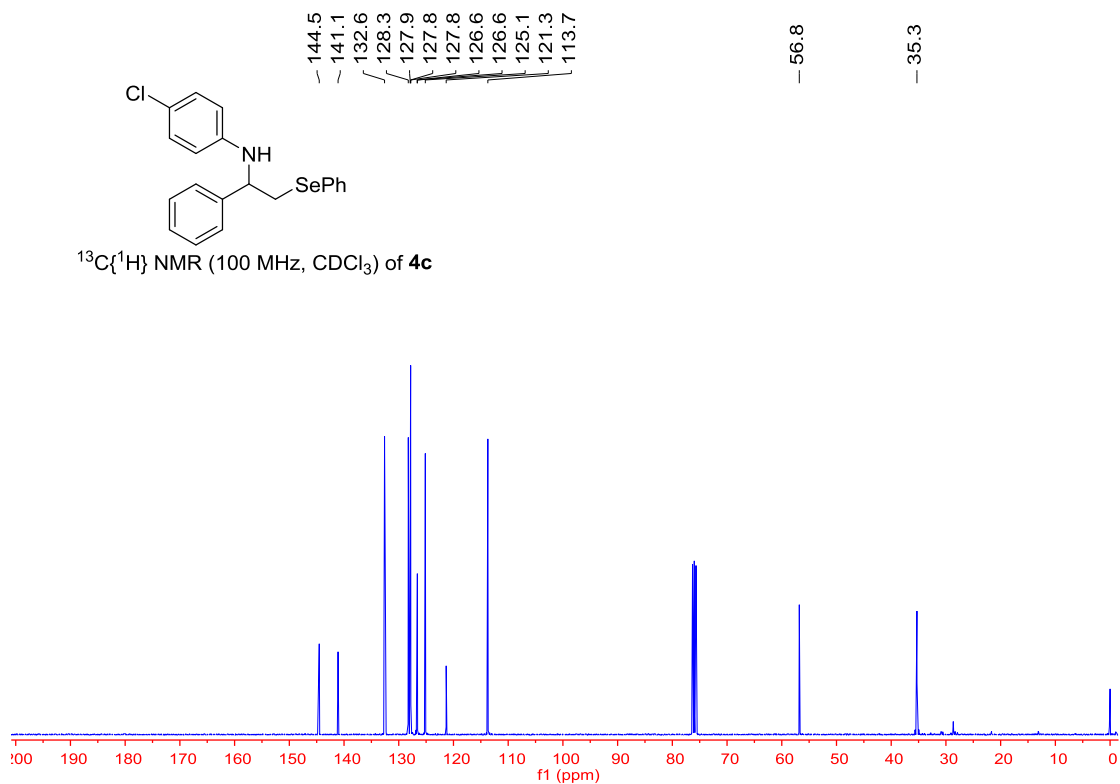

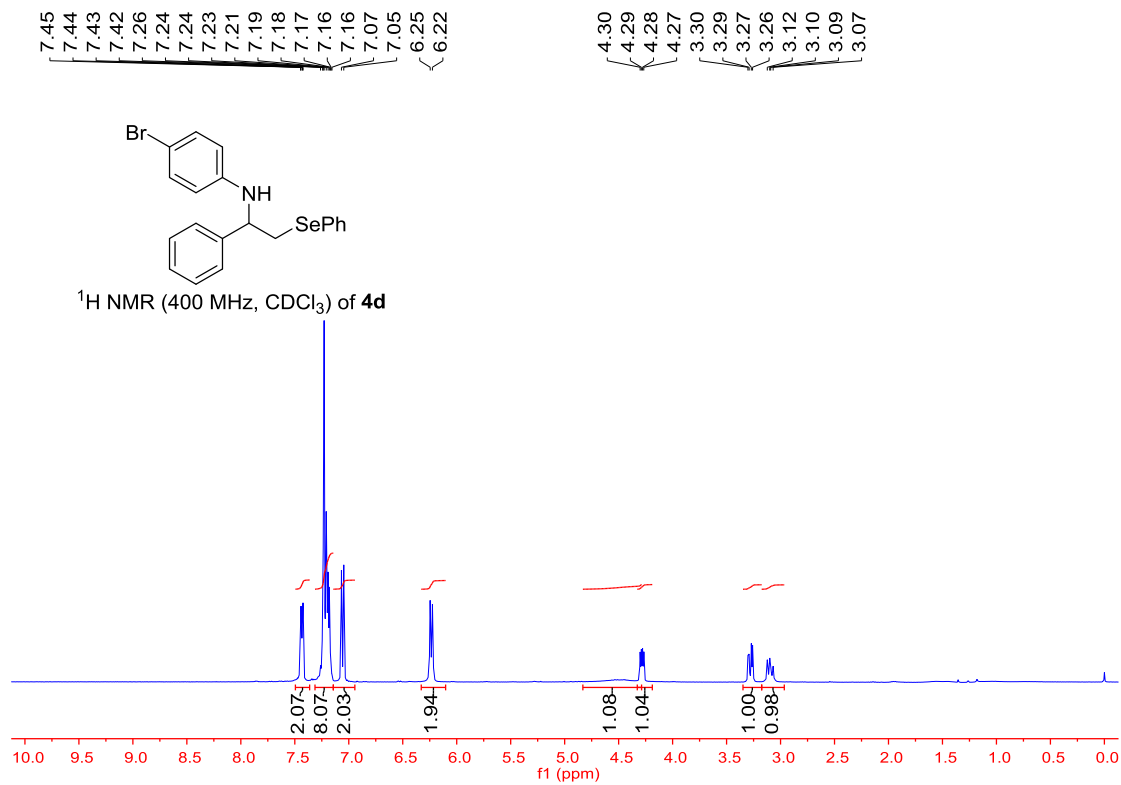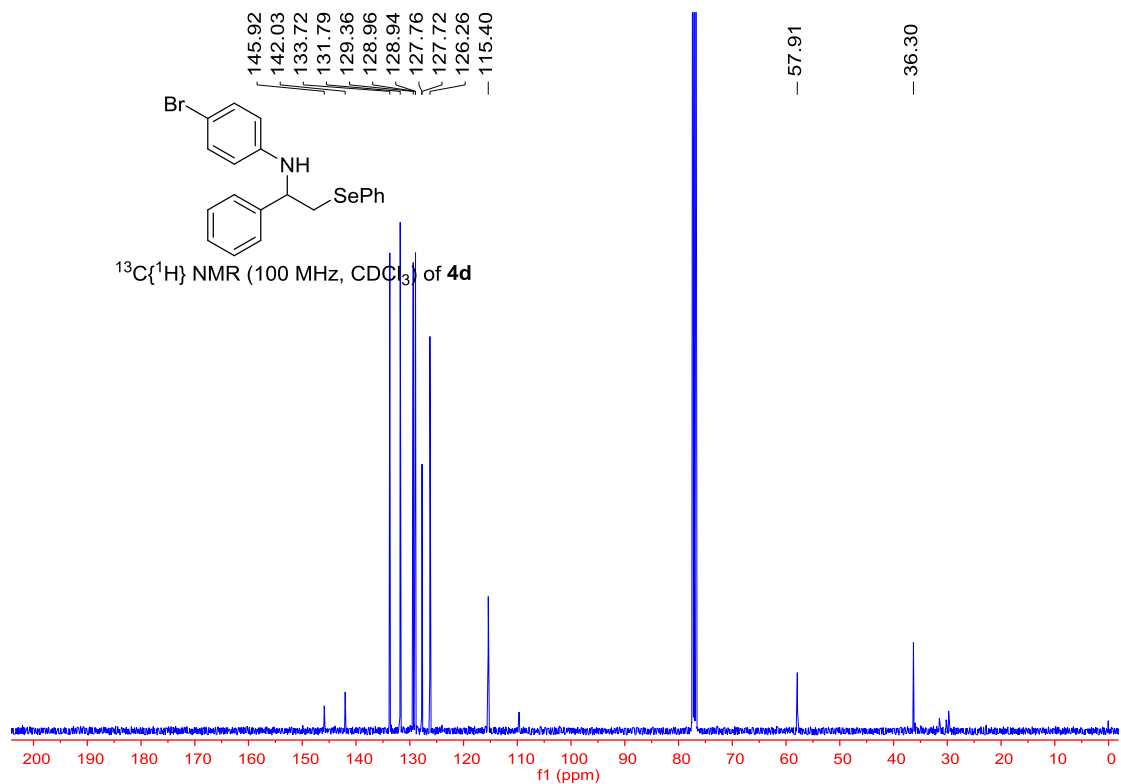

7.90  
7.89  
7.87  
7.46  
7.45  
7.44  
7.43  
7.27  
7.26  
7.24  
7.22  
7.21  
7.19  
7.17  
6.28  
6.26  
6.25

— 5.14

4.45  
4.44  
4.43  
4.42

3.33  
3.32  
3.30  
3.29  
3.15  
3.12  
3.11  
3.09

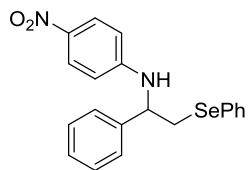

$^1\text{H}$  NMR (400 MHz,  $\text{CDCl}_3$ ) of **4e**

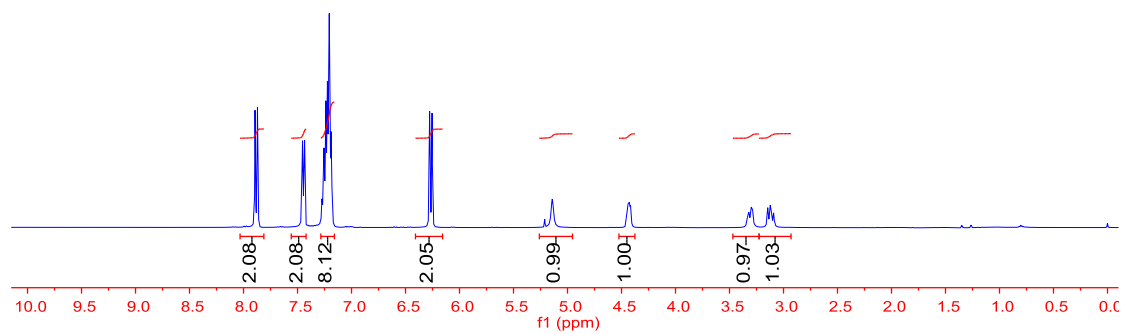

152.16  
140.87  
138.50  
133.93  
129.52  
129.16  
128.51  
128.16  
128.05  
126.16  
126.09  
— 112.19

— 57.55

— 35.75

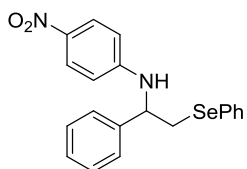

$^{13}\text{C}$   $\{^1\text{H}\}$  NMR (100 MHz,  $\text{CDCl}_3$ ) of **4e**

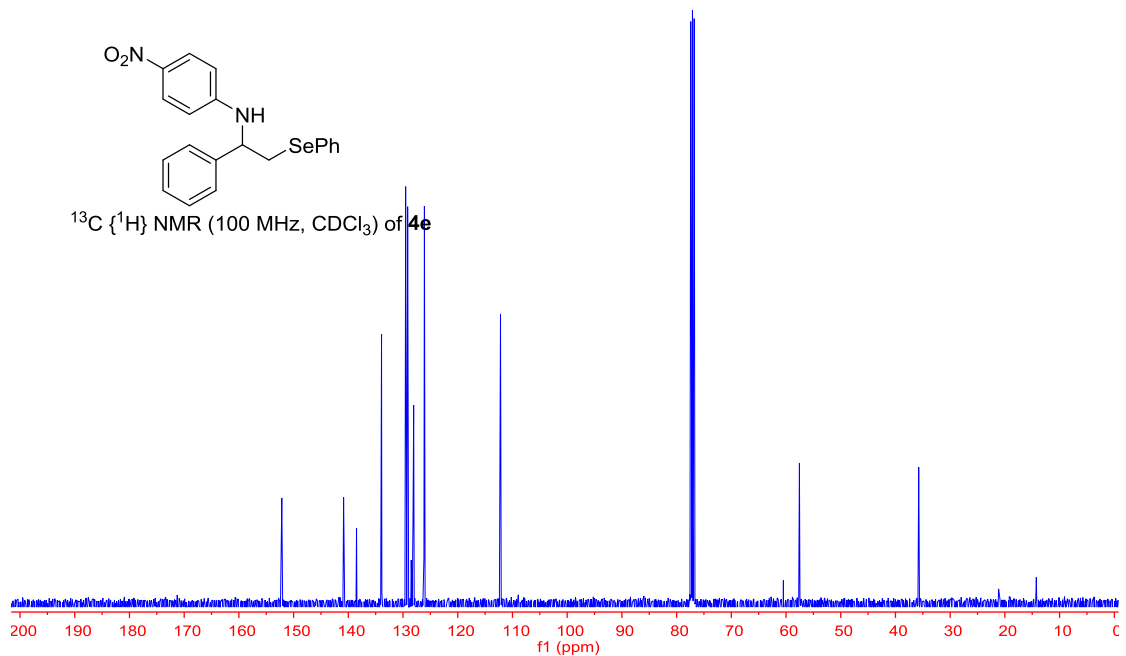

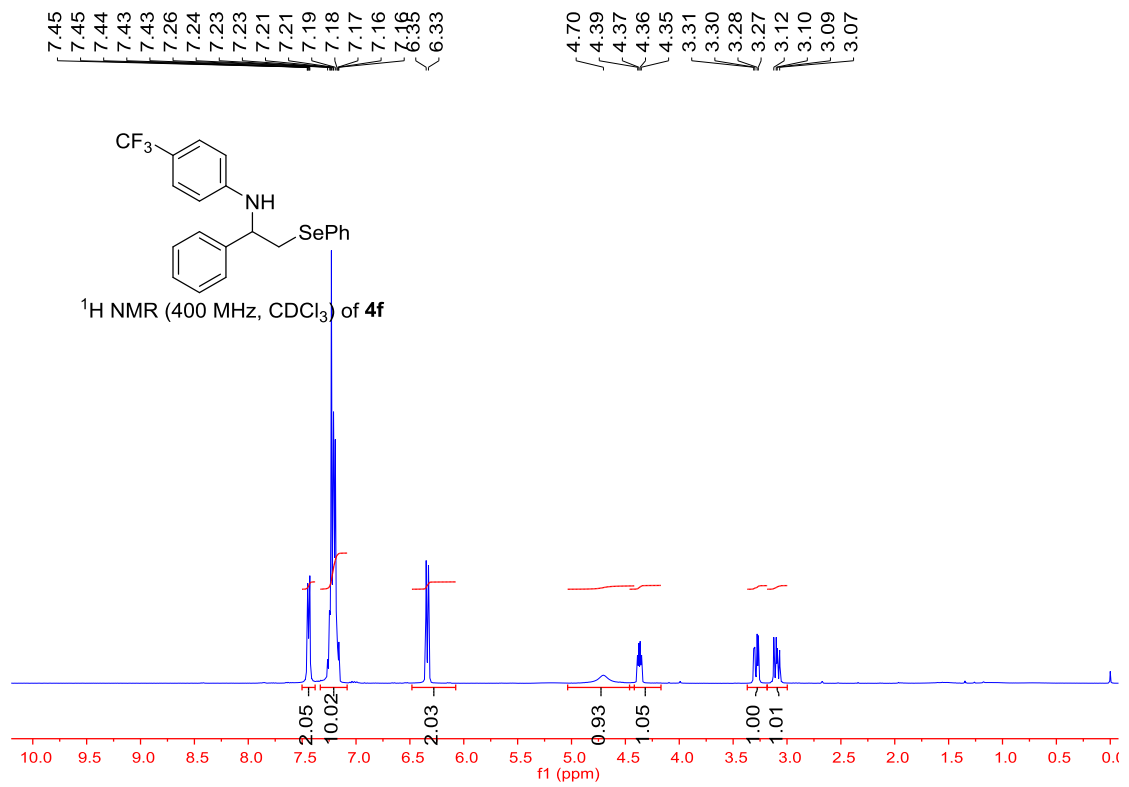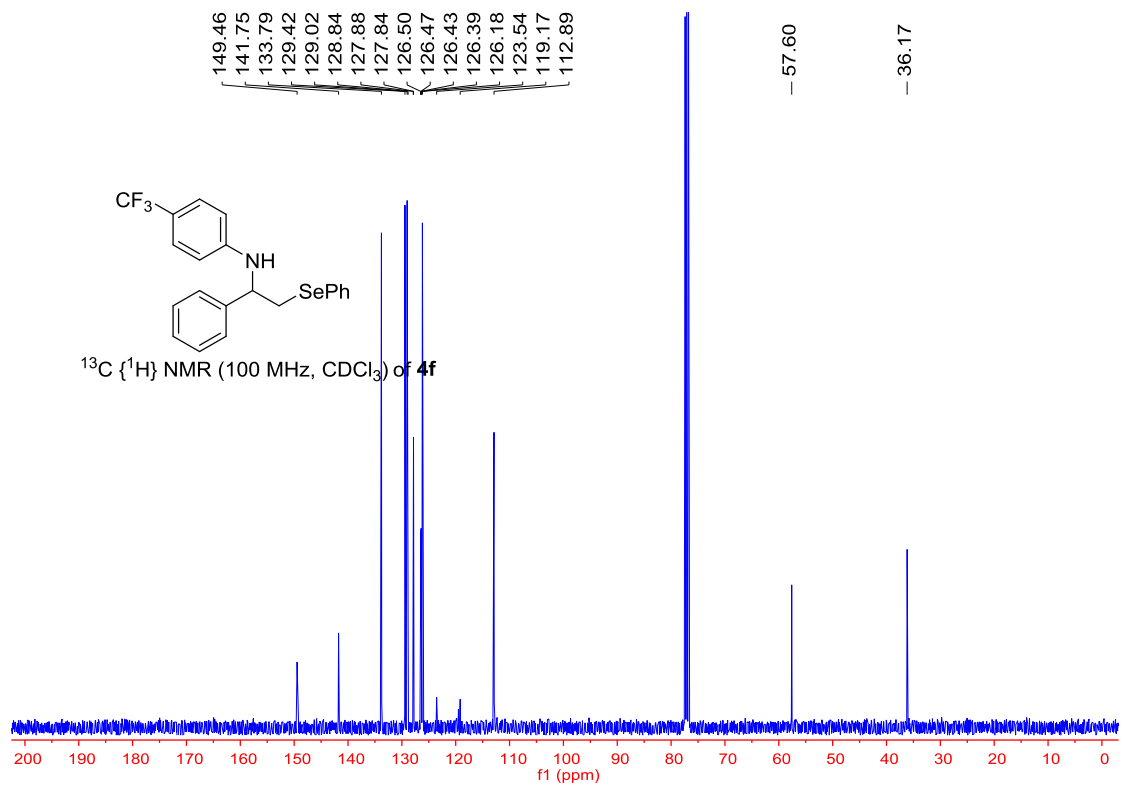

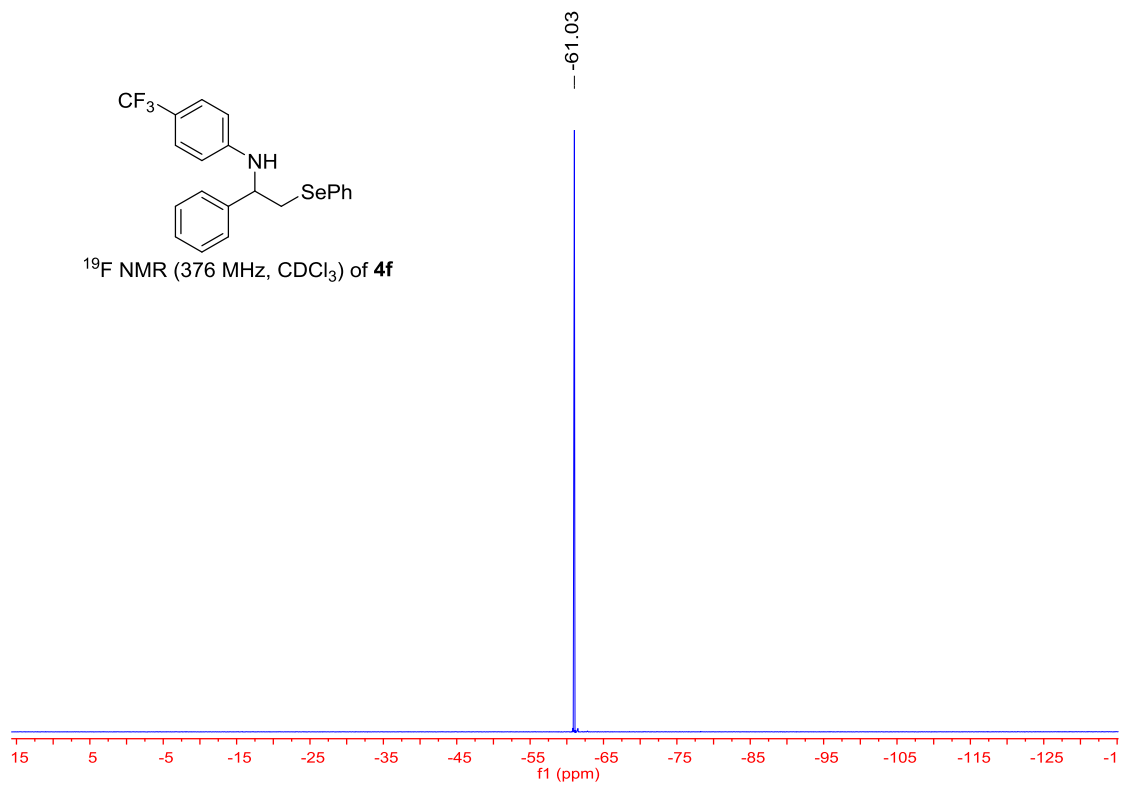

7.40, 7.39, 7.39, 7.21, 7.21, 7.20, 7.19, 7.18, 7.18, 7.17, 7.16, 7.15, 7.15, 6.27, 6.25, 4.95, 4.93, 4.92, 4.91, 4.36, 4.35, 4.34, 3.27, 3.25, 3.23, 3.22, 3.10, 3.07, 3.06, 3.04

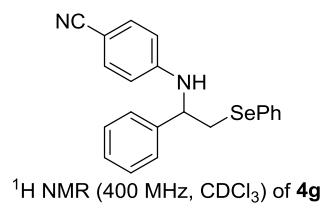

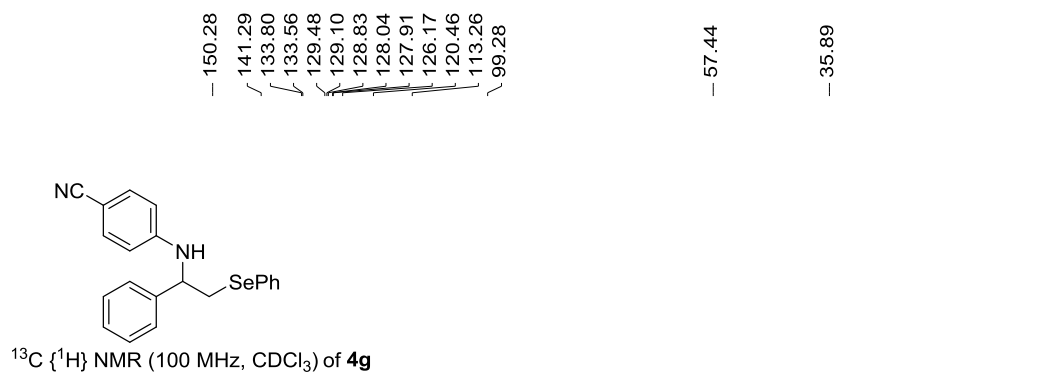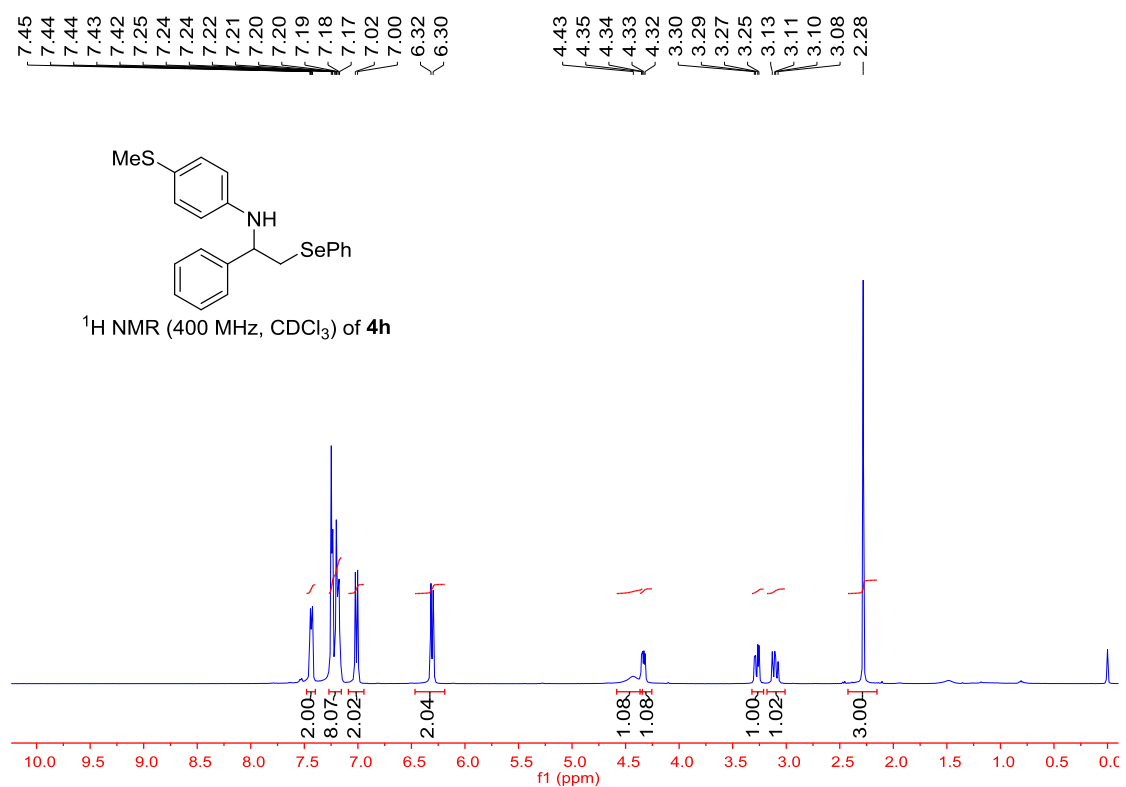



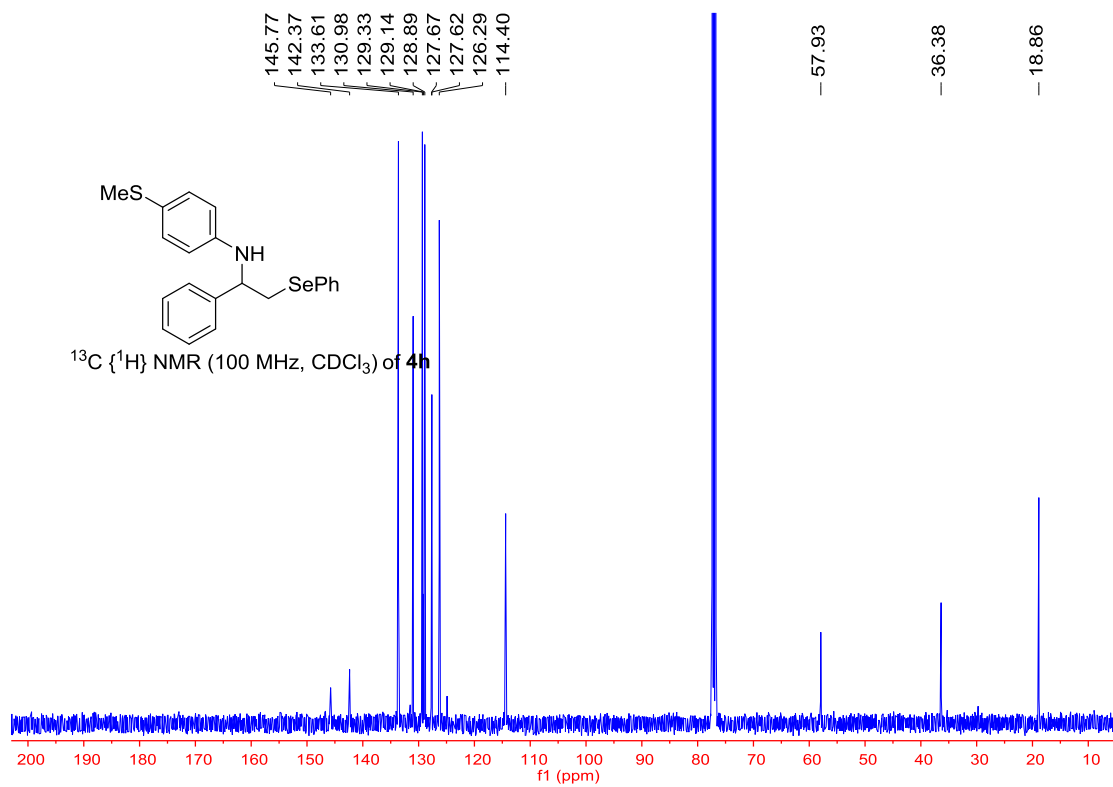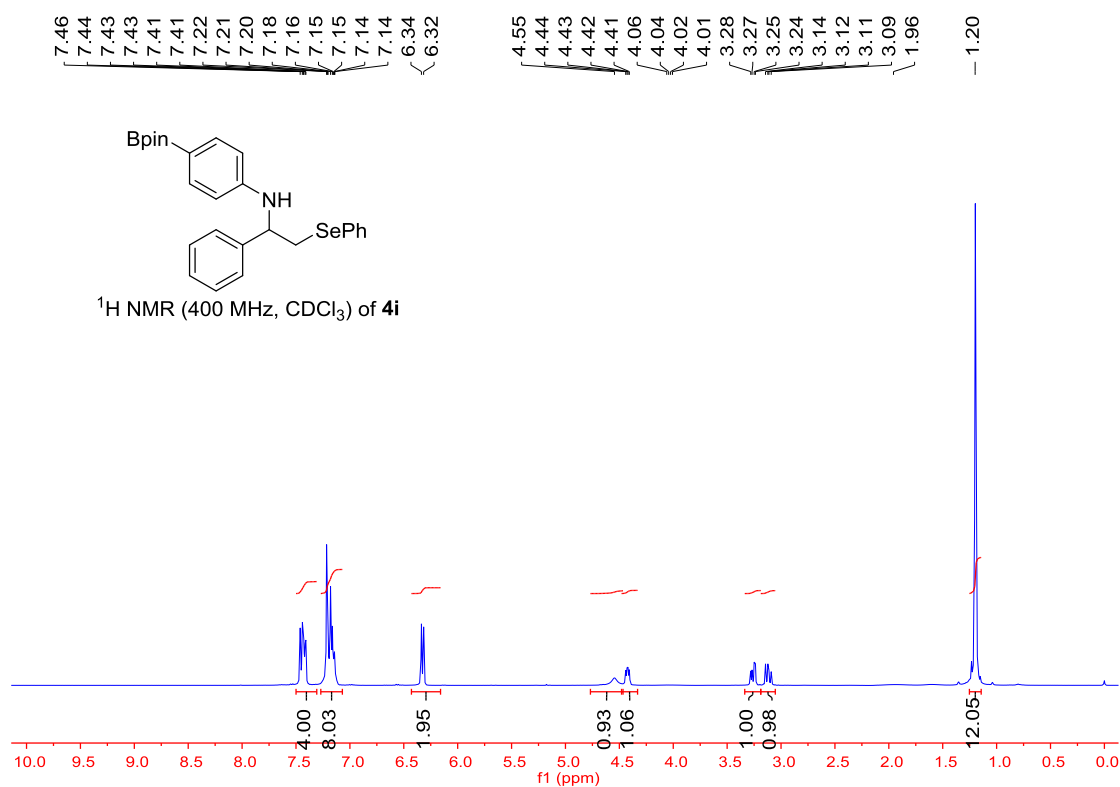

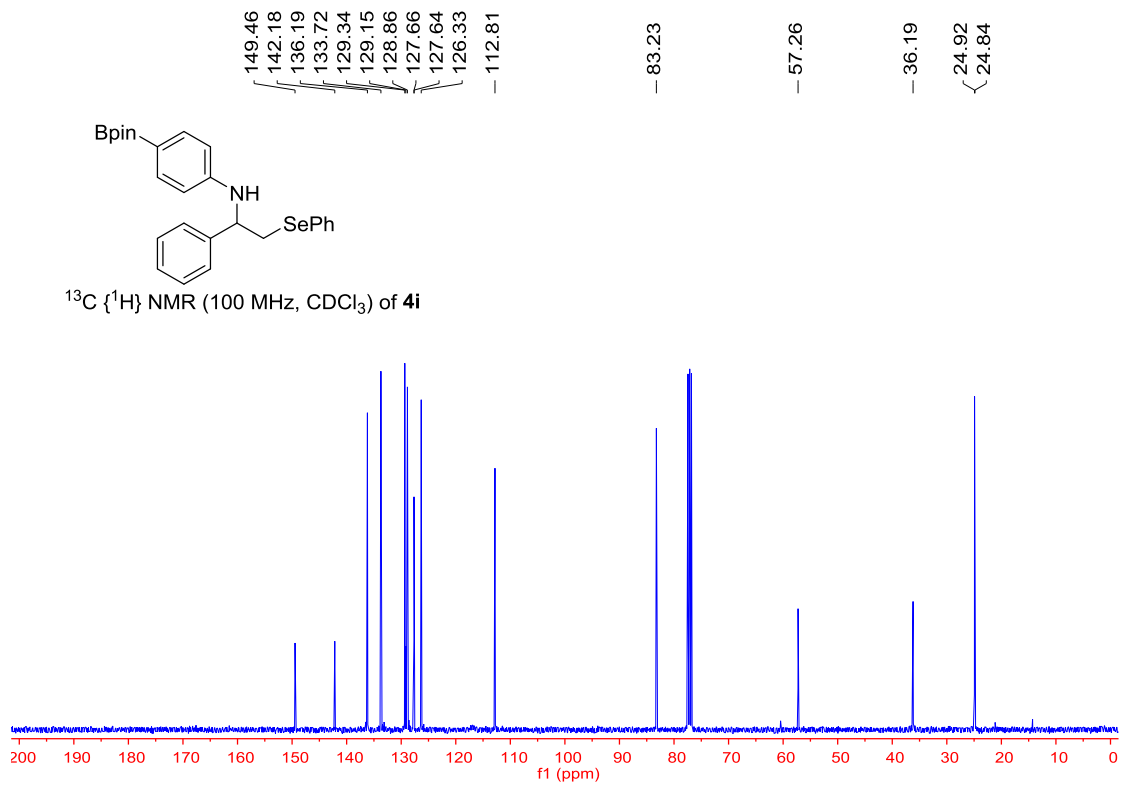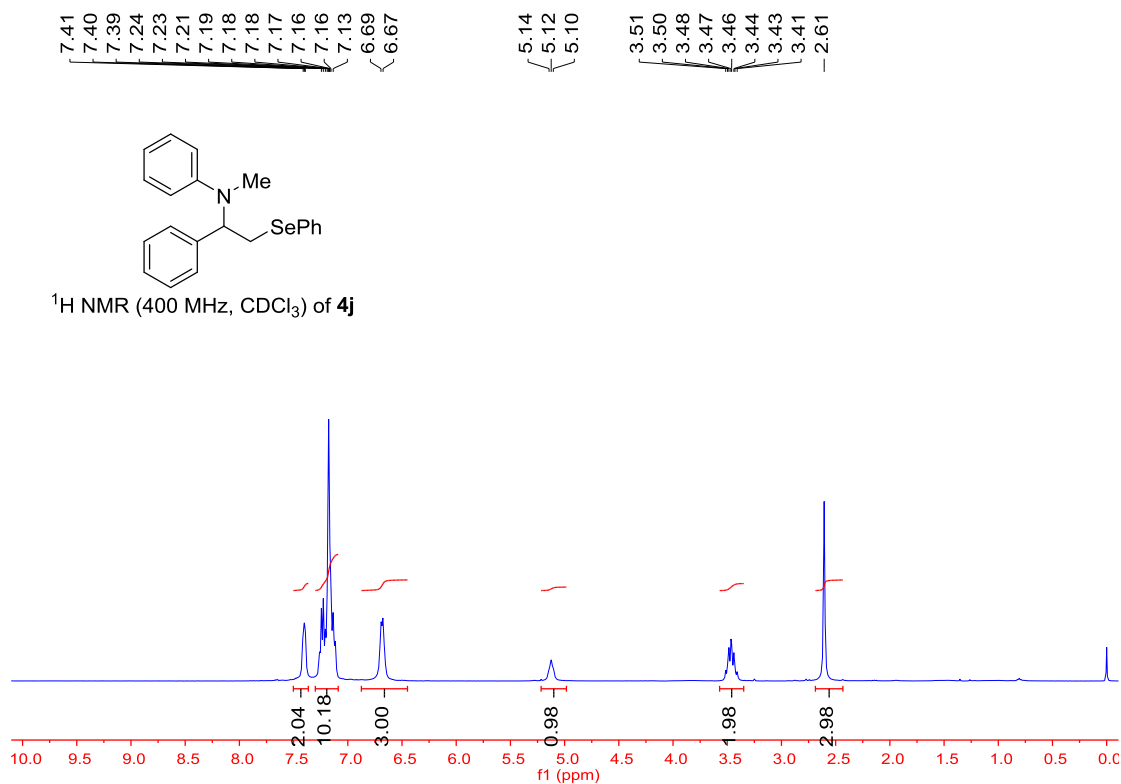

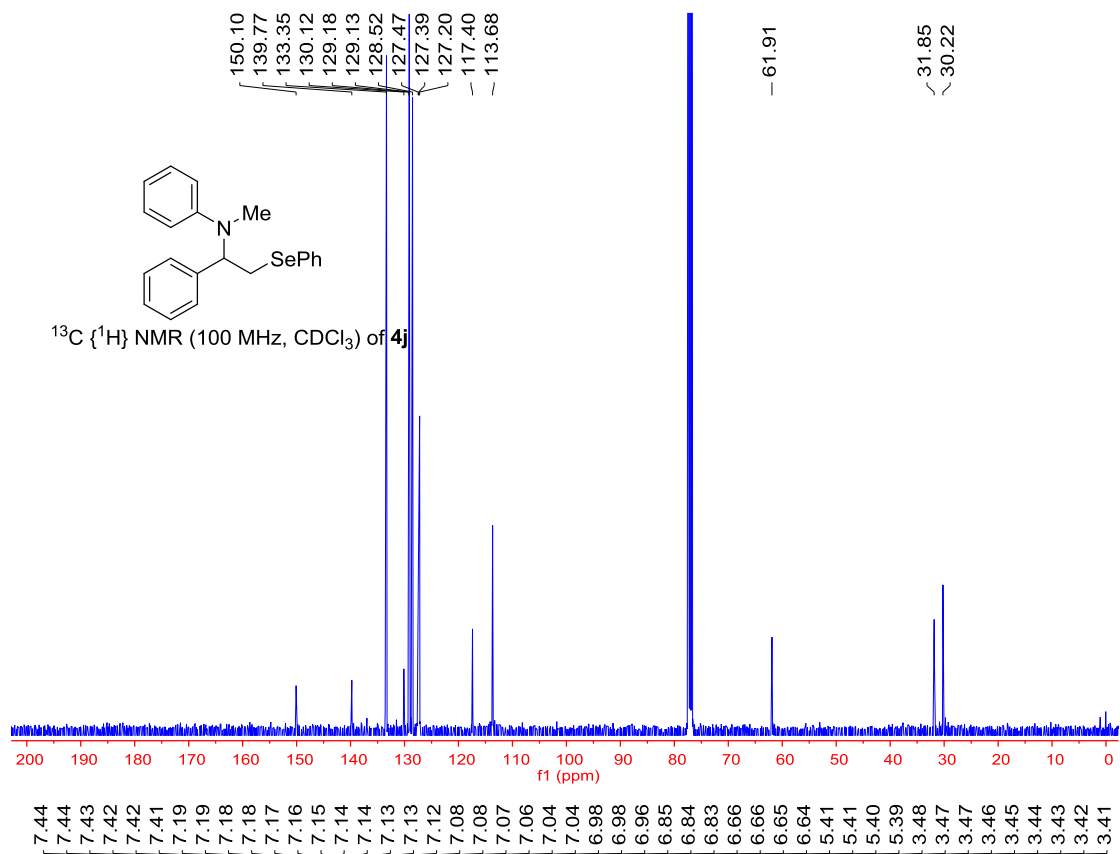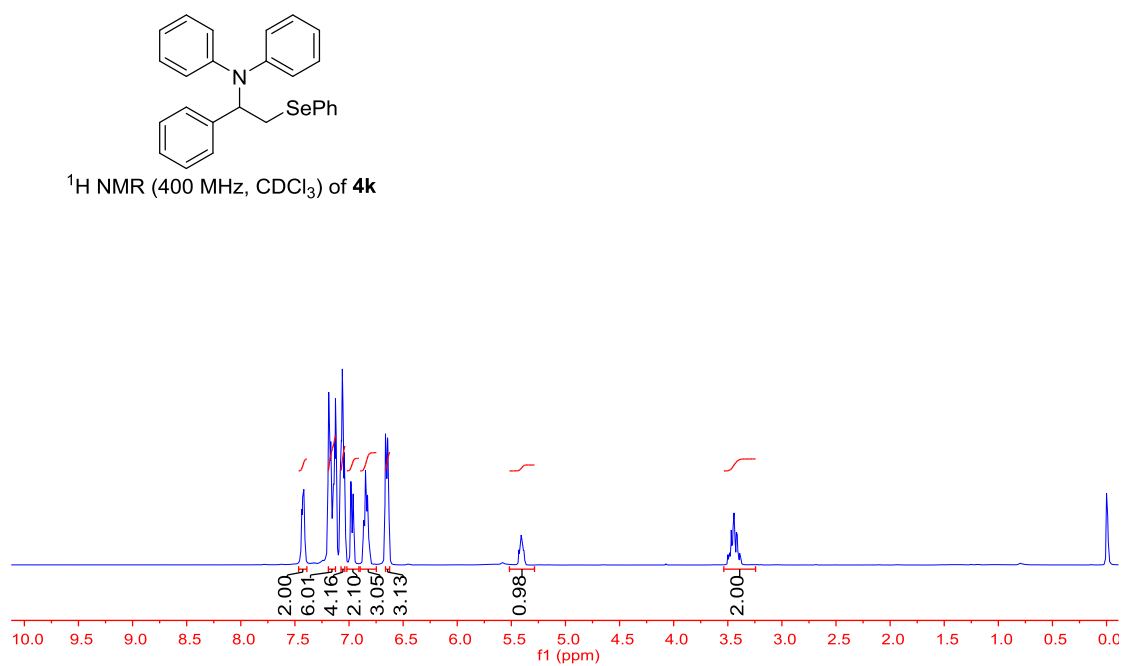

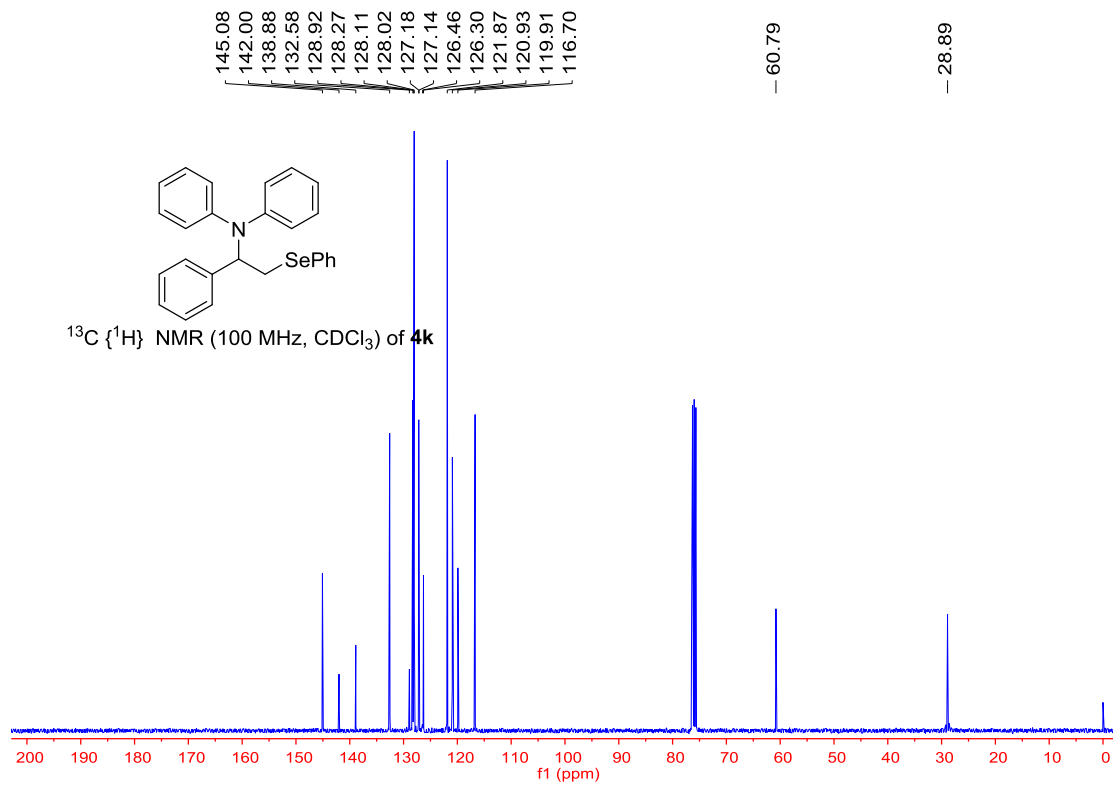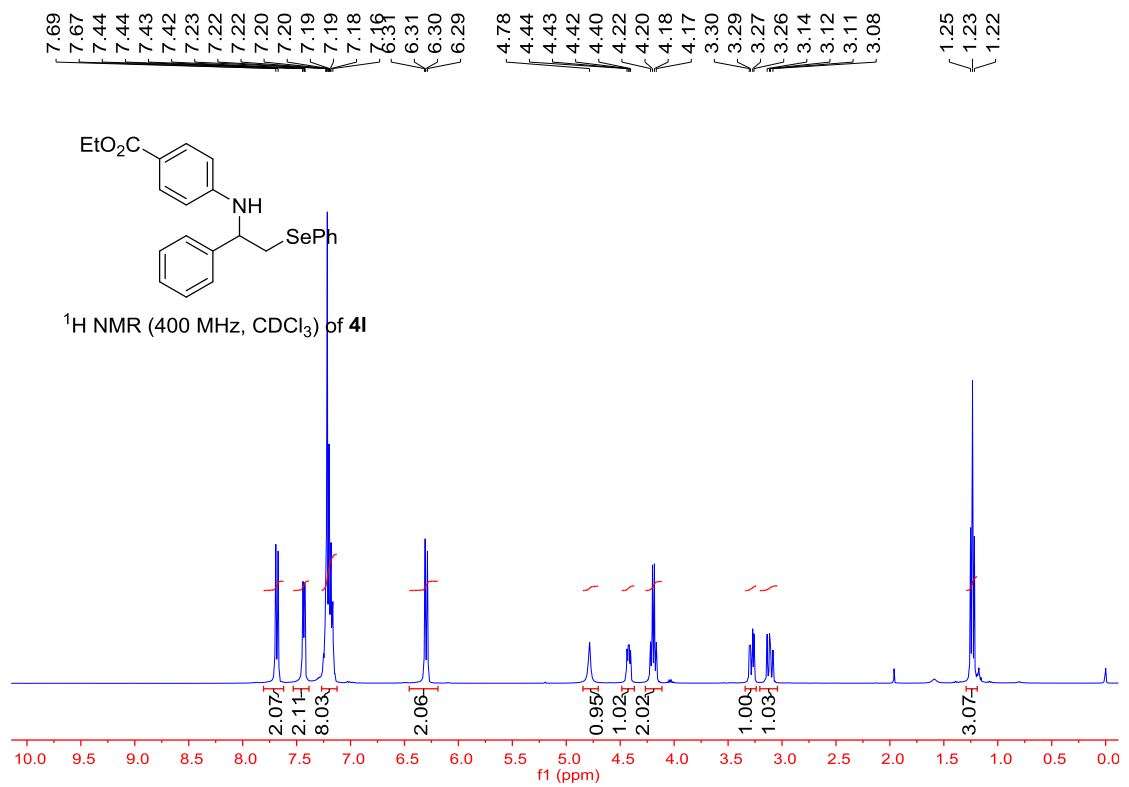

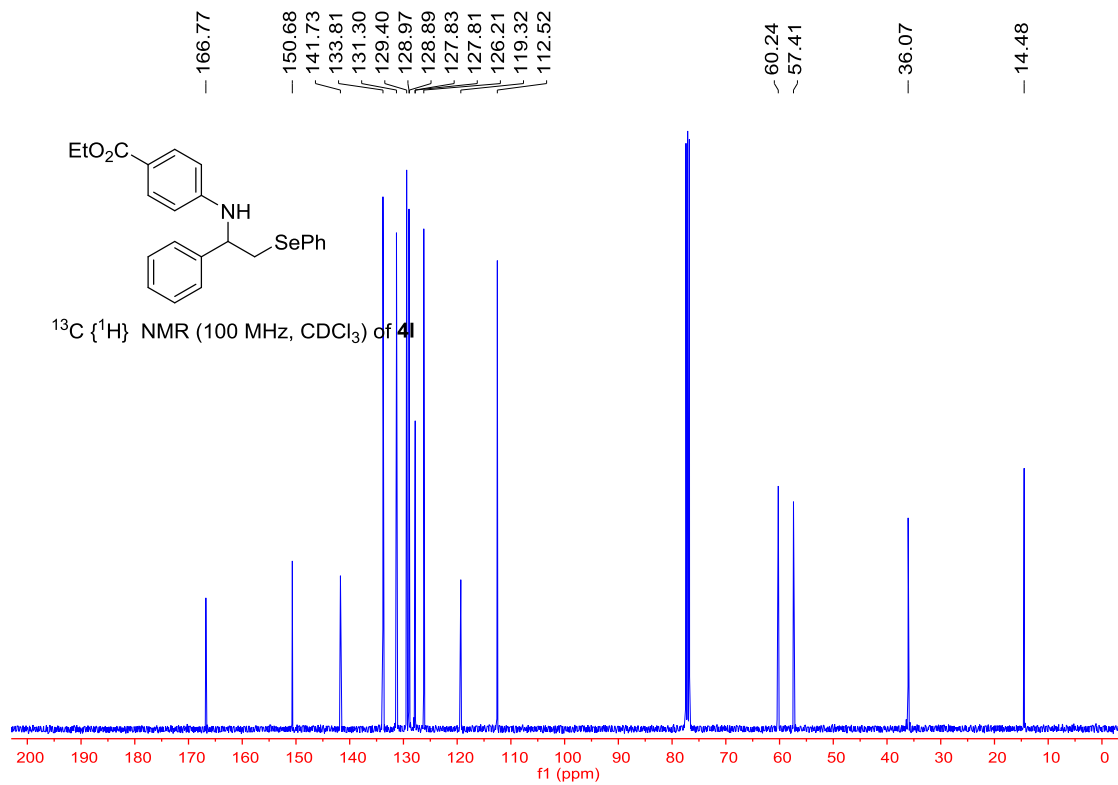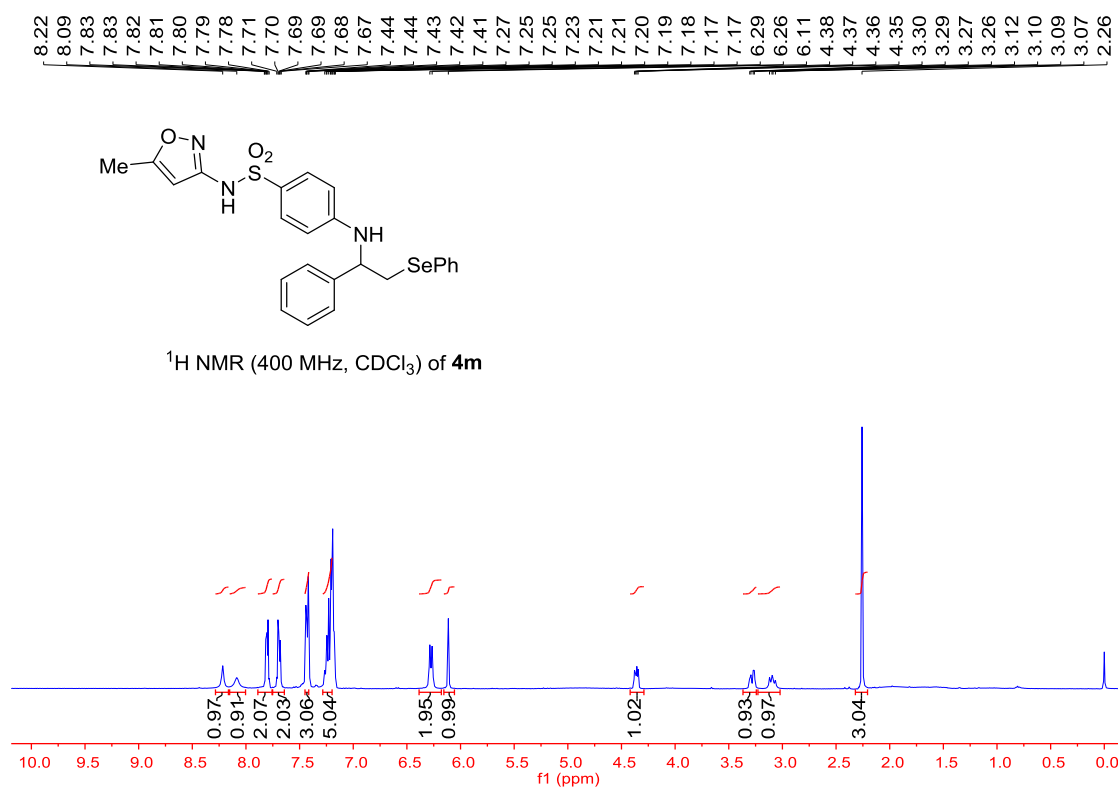

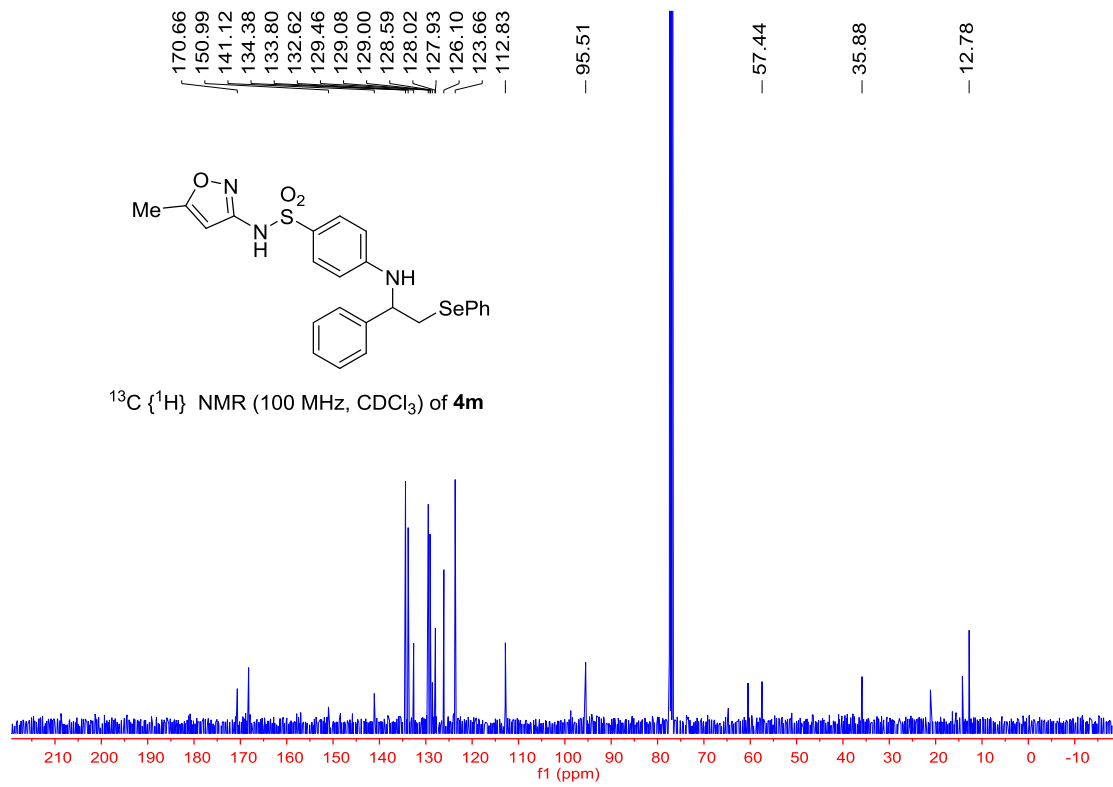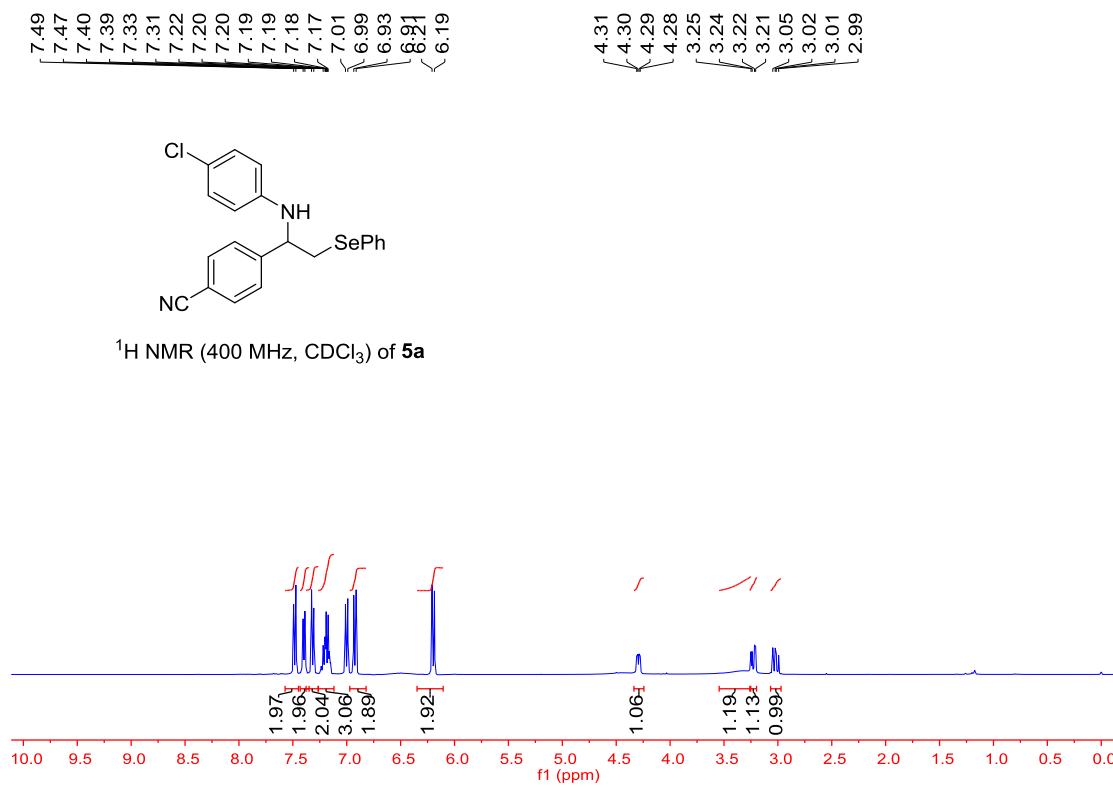

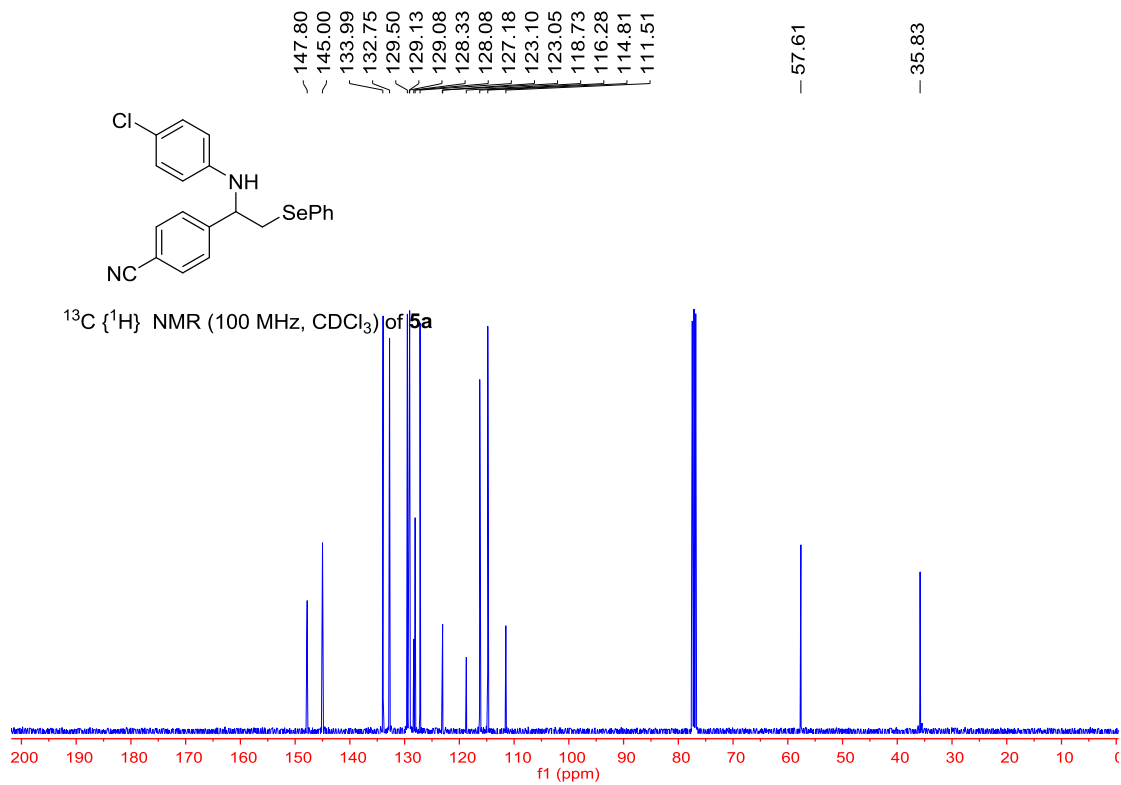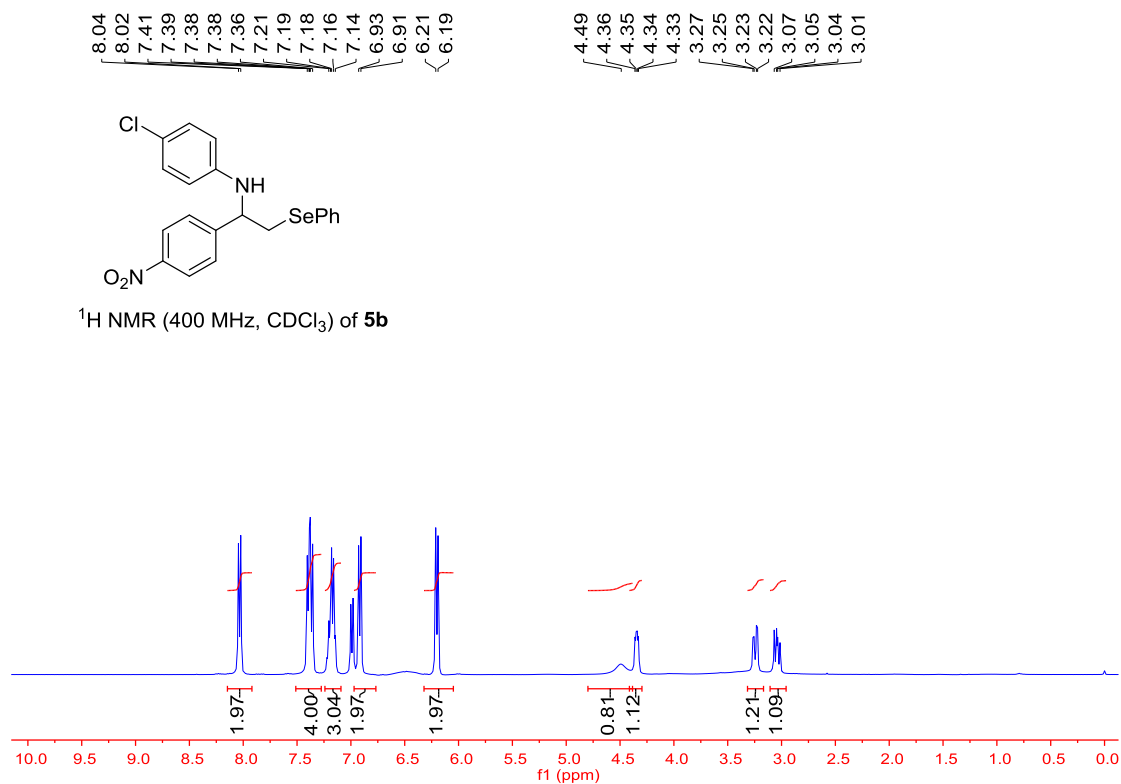

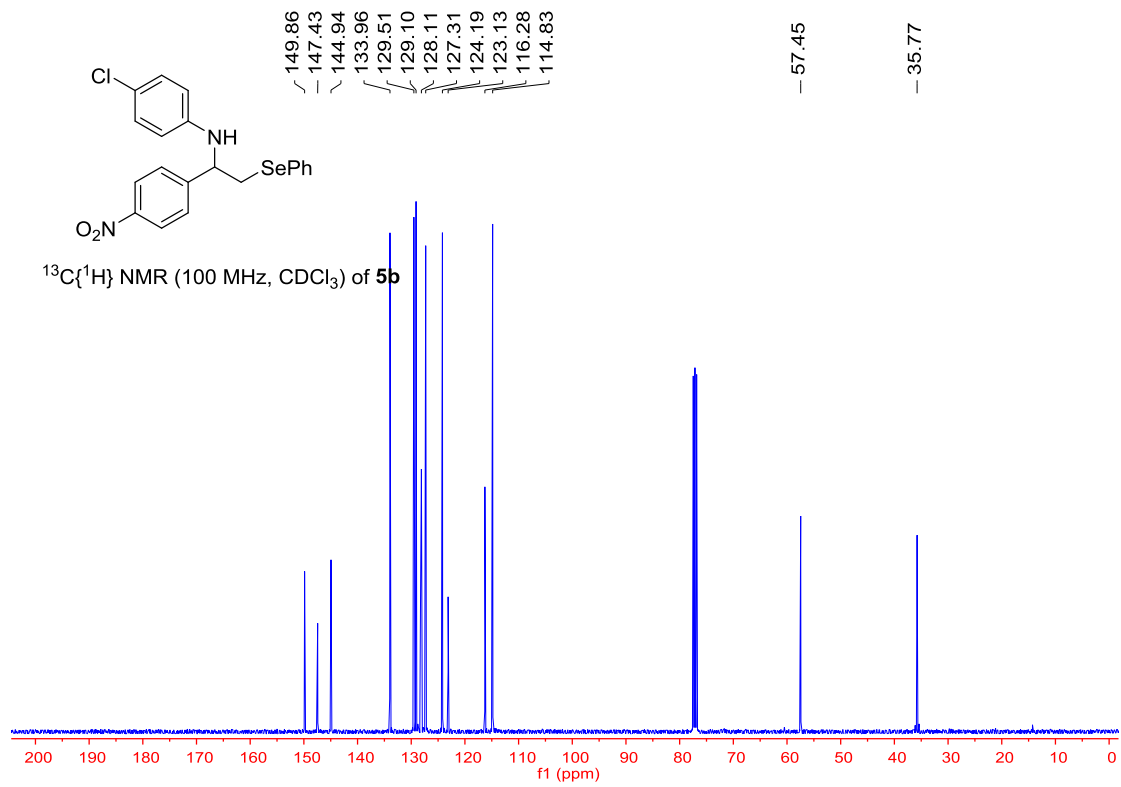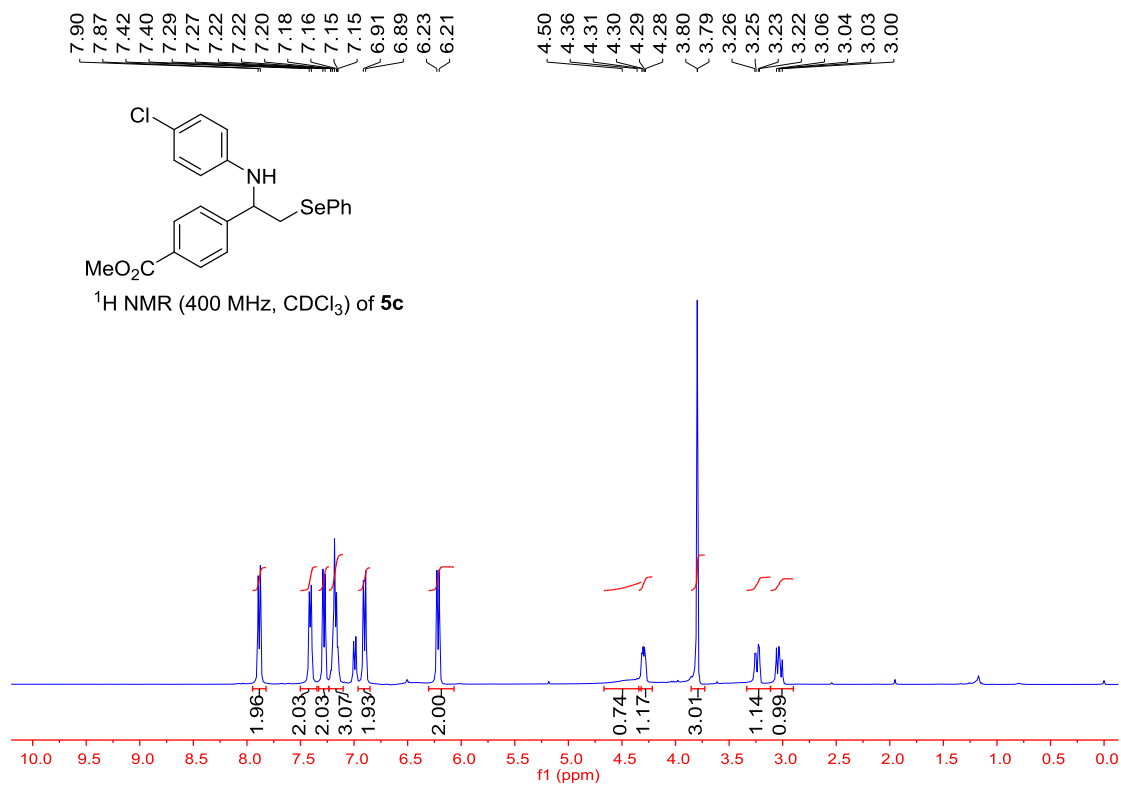



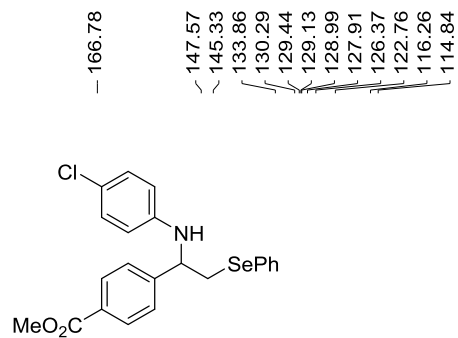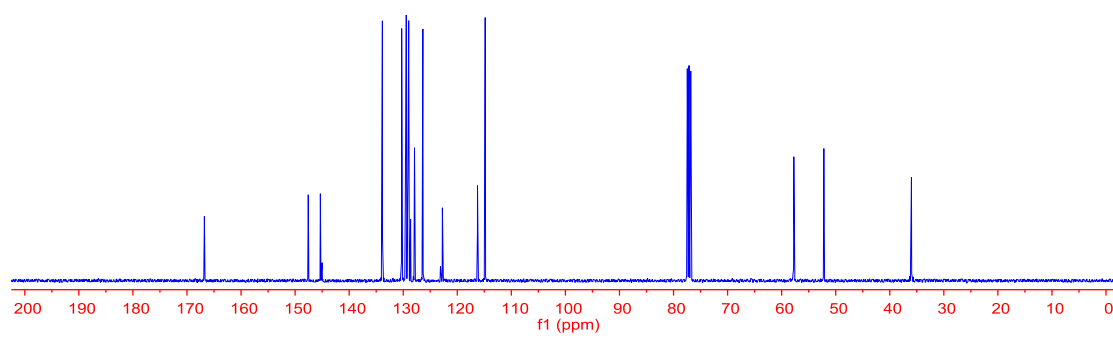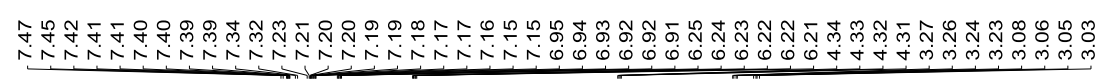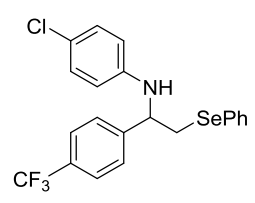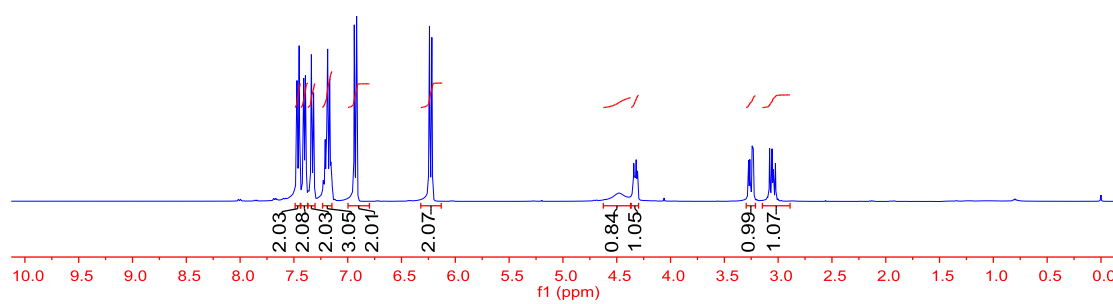

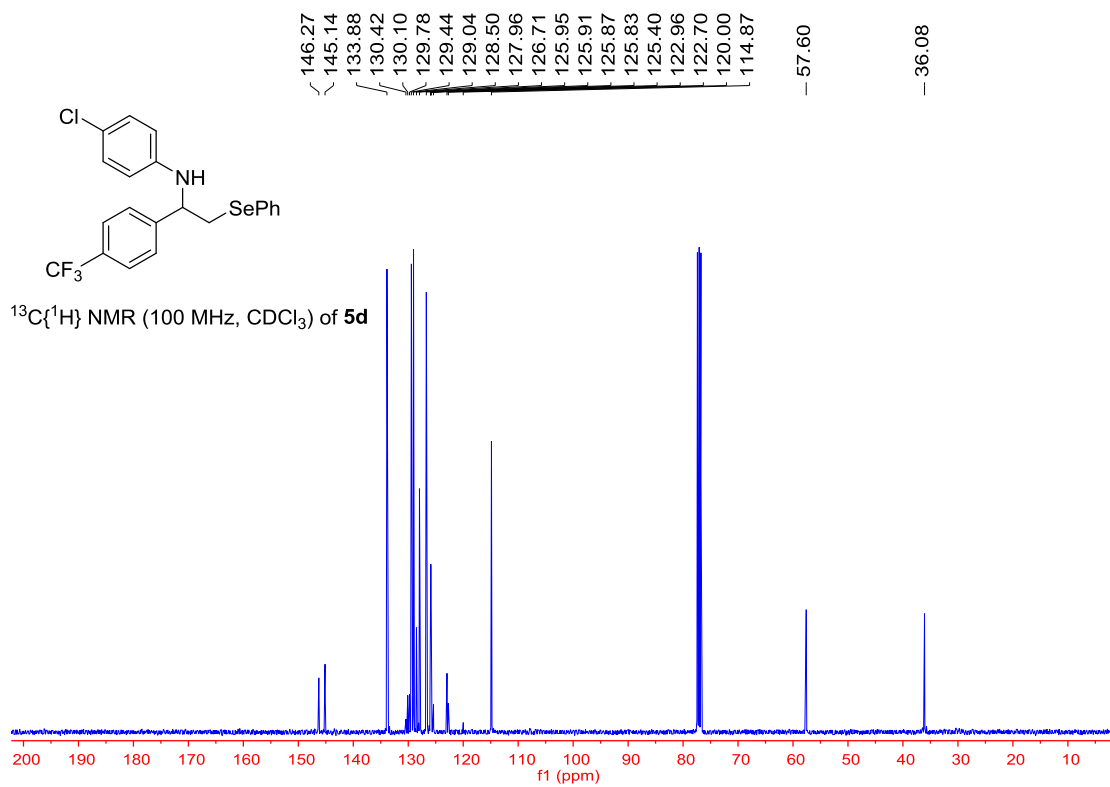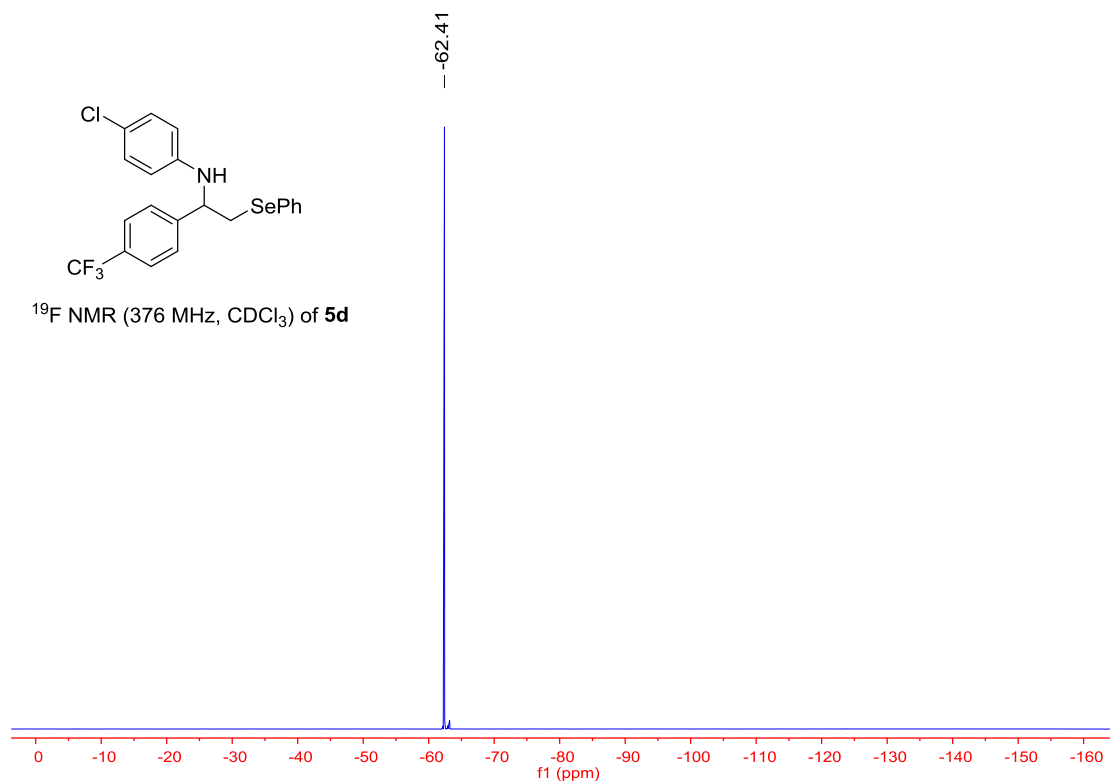

7.44  
7.42  
7.42  
7.19  
7.18  
7.17  
7.17  
7.16  
7.15  
7.13  
7.13  
7.05  
7.03  
6.97  
6.95  
6.93  
6.37  
5.33  
5.32  
5.31  
5.30  
- 4.70  
3.54  
3.51  
3.51  
3.48  
3.30  
3.28  
3.26  
3.25

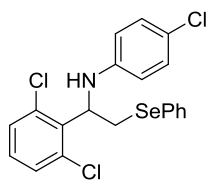

$^1\text{H}$  NMR (400 MHz,  $\text{CDCl}_3$ ) of **5e**

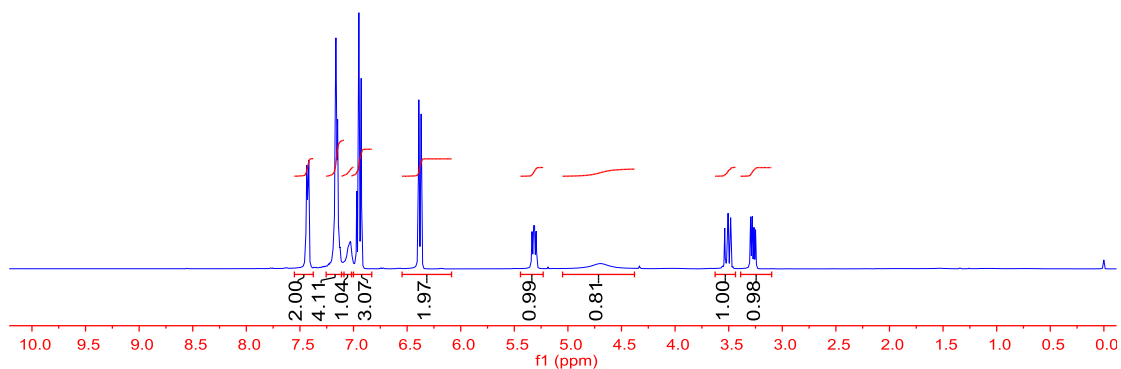

144.96  
135.62  
133.71  
130.45  
129.33  
129.17  
129.15  
129.09  
128.74  
127.53  
122.68  
114.57  
- 55.22  
- 30.48

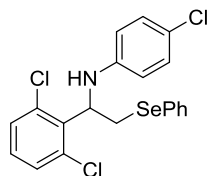

$^{13}\text{C}\{^1\text{H}\}$  NMR (100 MHz,  $\text{CDCl}_3$ ) of **5e**

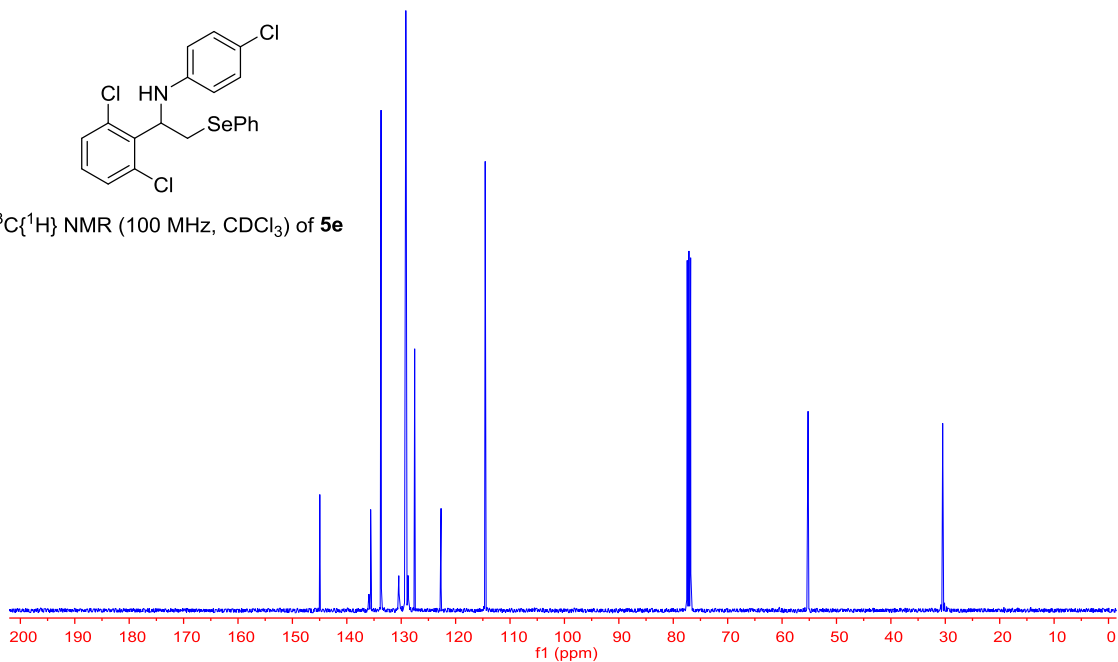

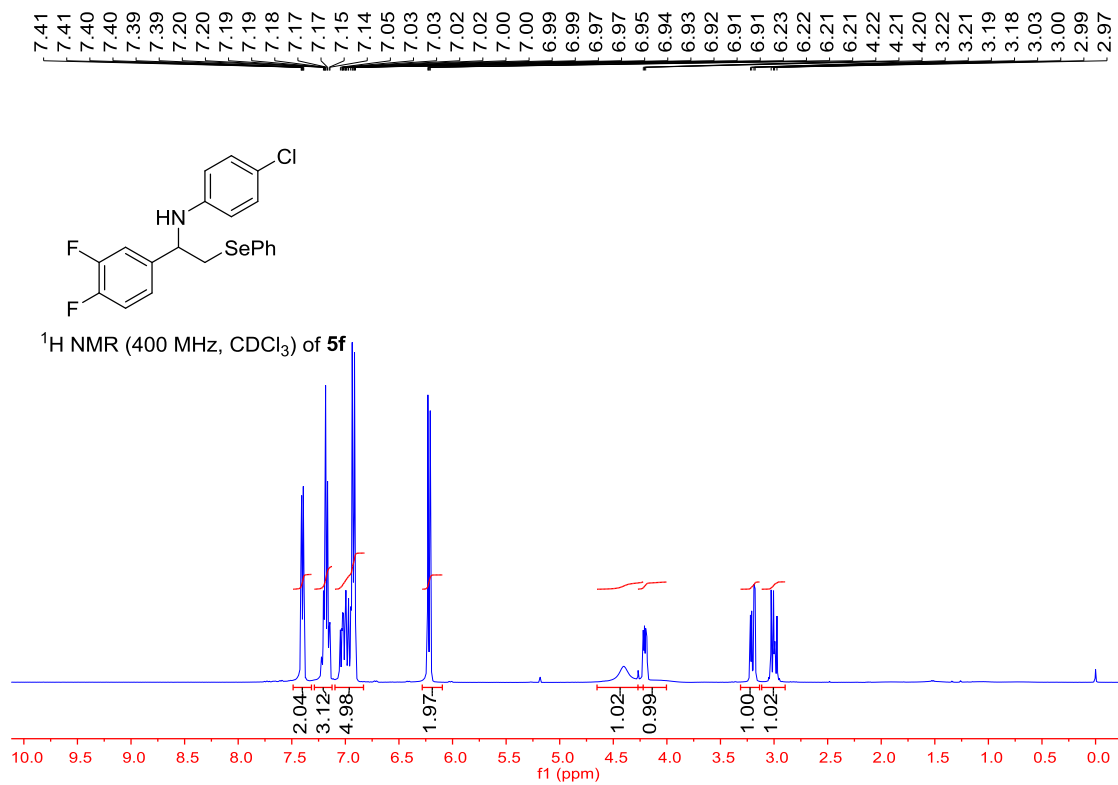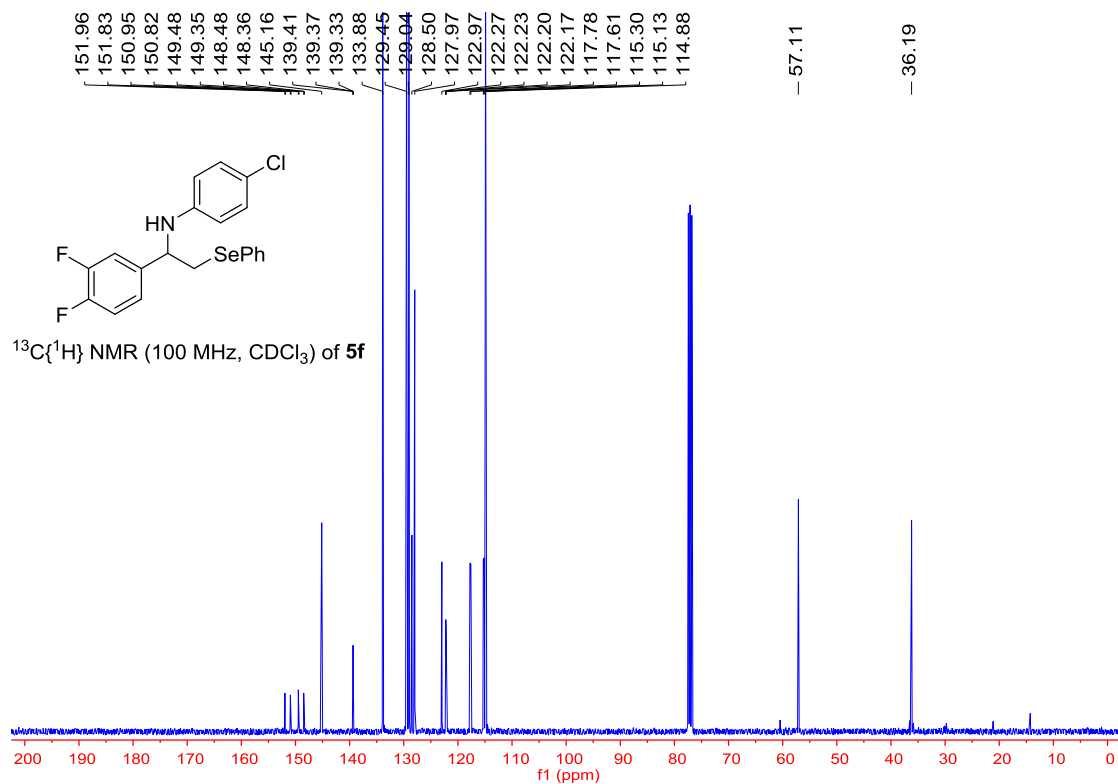

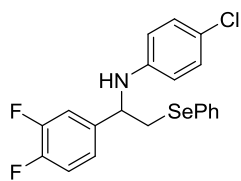

$^{19}\text{F}$  NMR (376 MHz,  $\text{CDCl}_3$ ) of **5f**

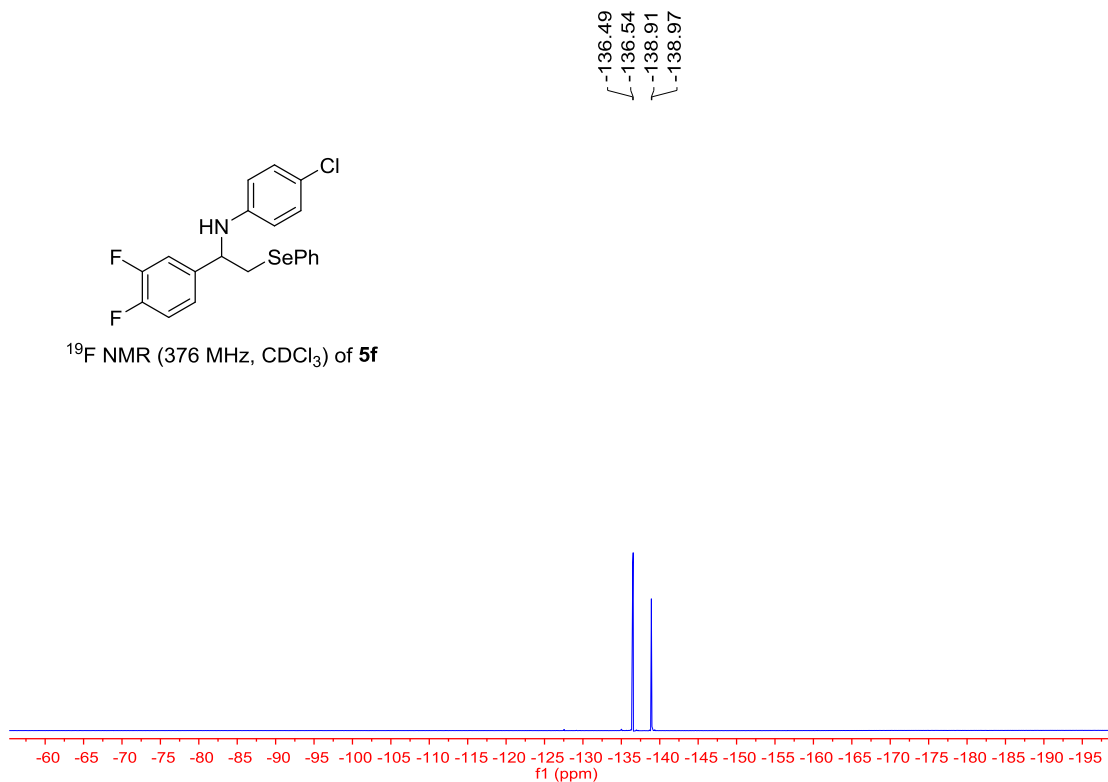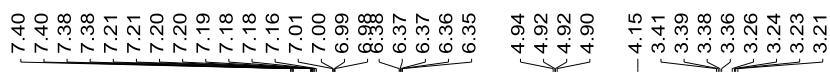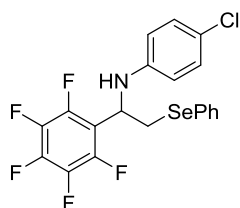

$^1\text{H}$  NMR (400 MHz,  $\text{CDCl}_3$ ) of **5g**

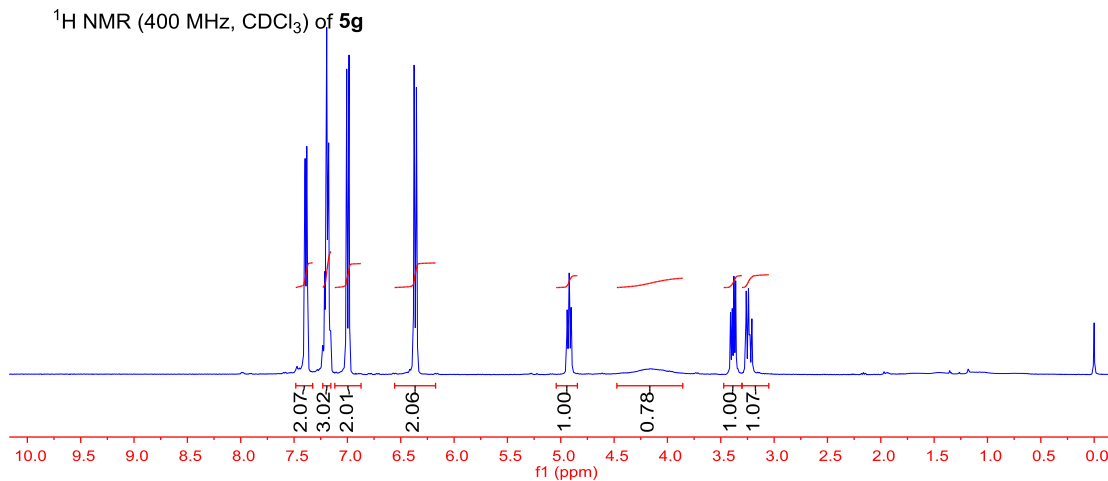

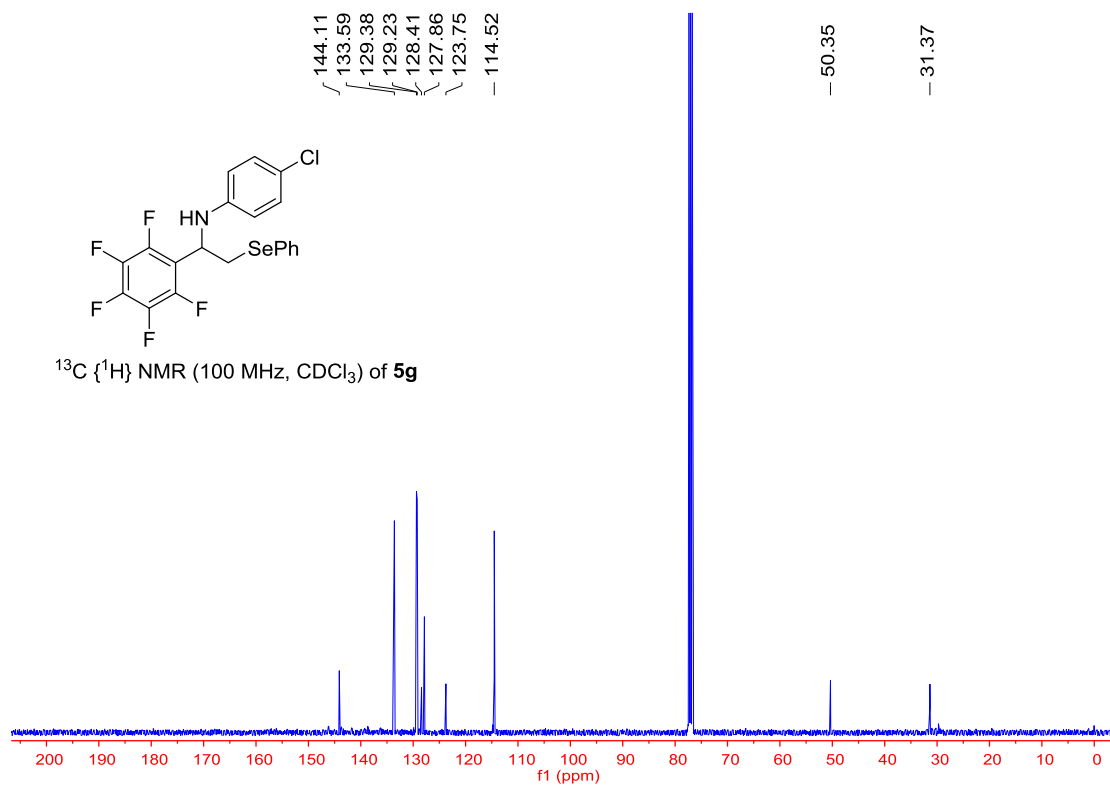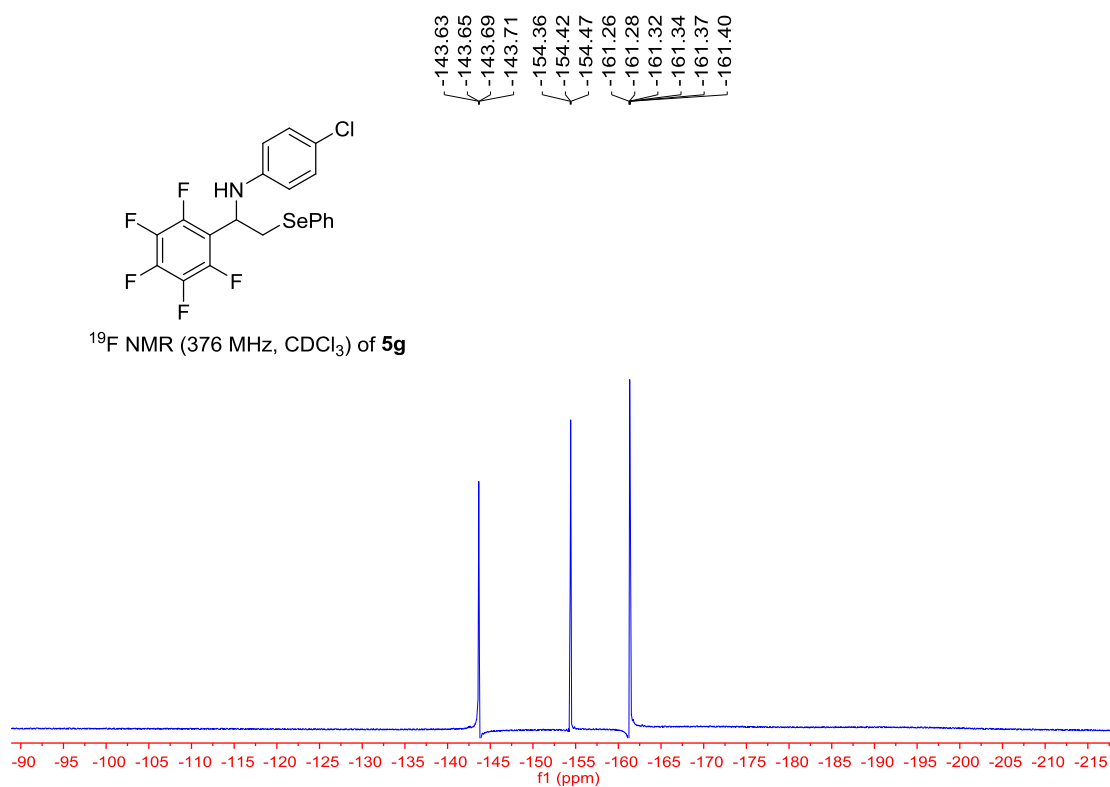

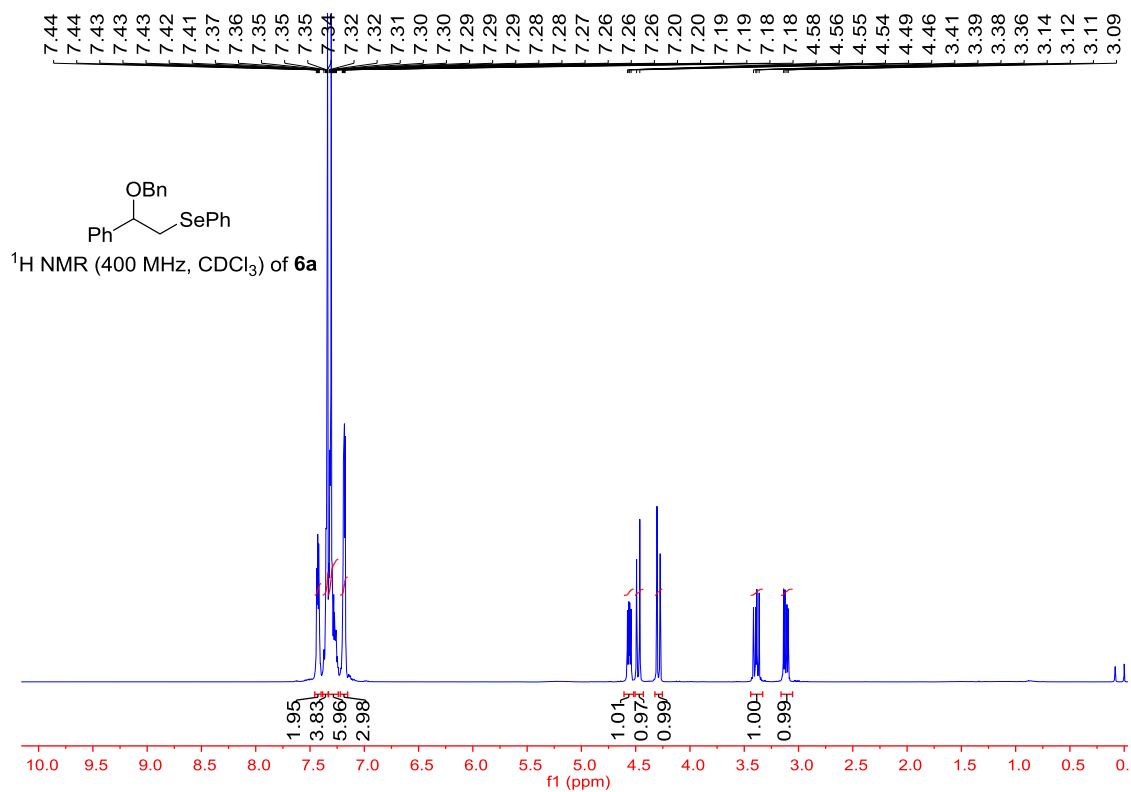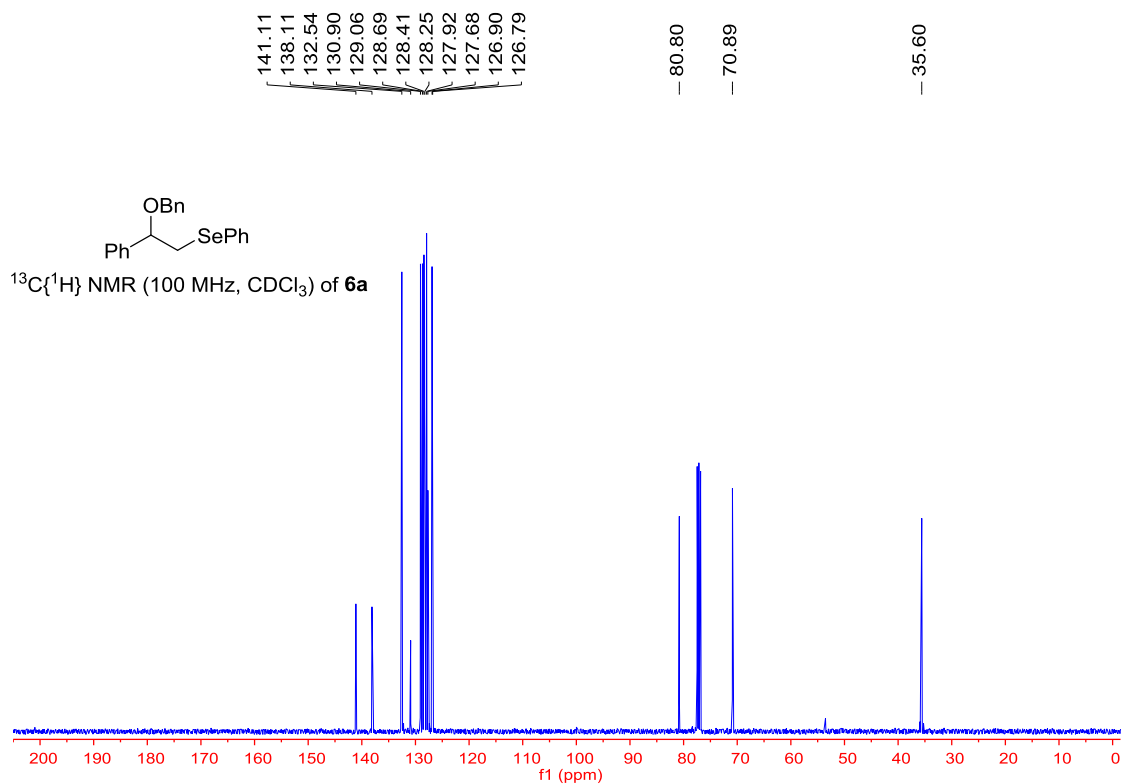

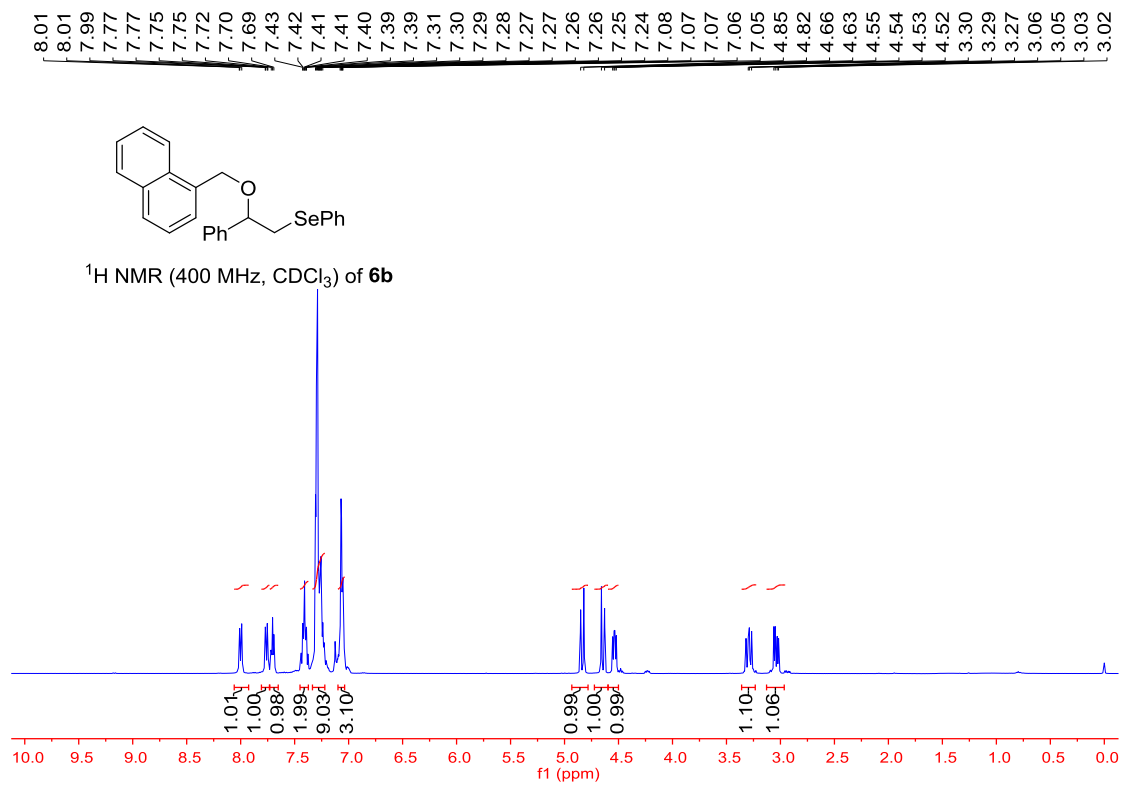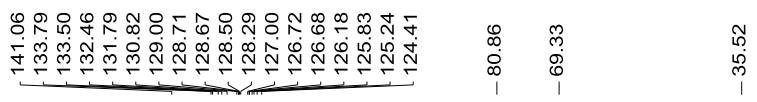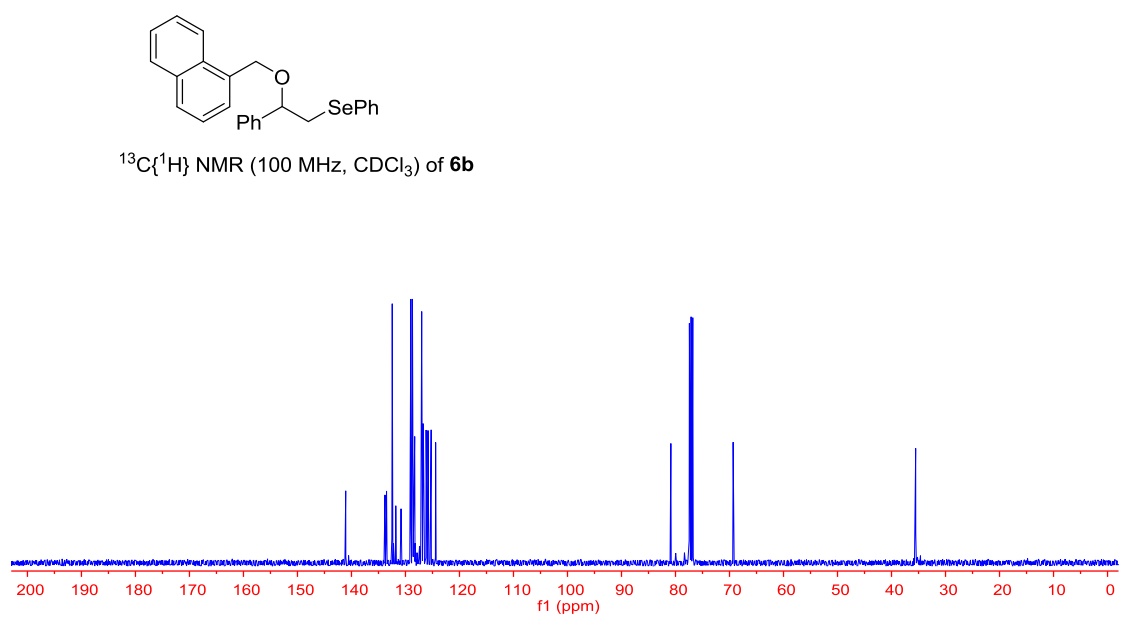



7.37  
7.36  
7.35  
7.34  
7.31  
7.30  
7.29  
7.27  
7.26  
7.19  
7.16  
7.14  
7.13  
7.12  
7.11  
7.10  
7.09  
6.77  
6.76  
4.55  
4.53  
4.52  
4.51  
4.49  
4.38  
4.35  
3.32  
3.29  
3.28  
3.26  
3.06  
3.04  
3.03  
3.01

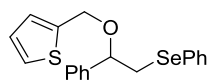

$^1\text{H}$  NMR (400 MHz,  $\text{CDCl}_3$ ) of **6c**

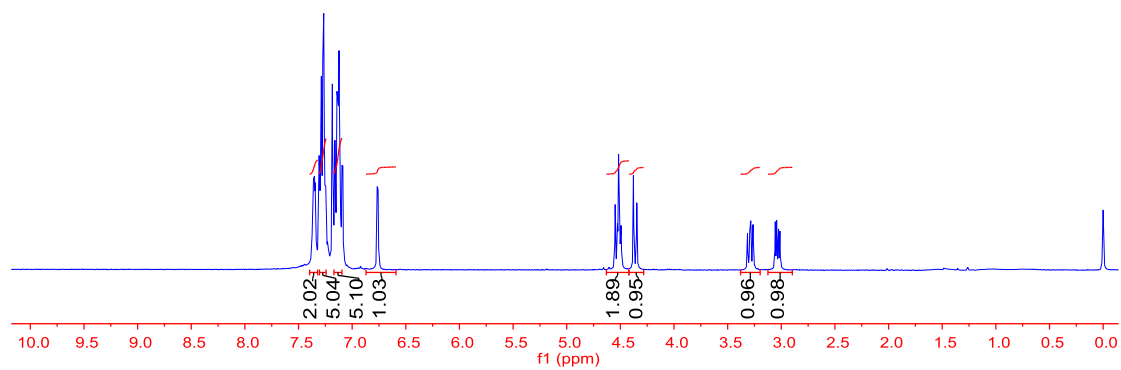

147.51  
140.50  
136.58  
132.55  
130.09  
129.24  
129.01  
128.69  
128.35  
127.33  
126.89  
126.80

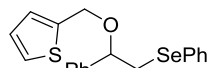

$^{13}\text{C}\{^1\text{H}\}$  NMR (100 MHz,  $\text{CDCl}_3$ ) of **6c**

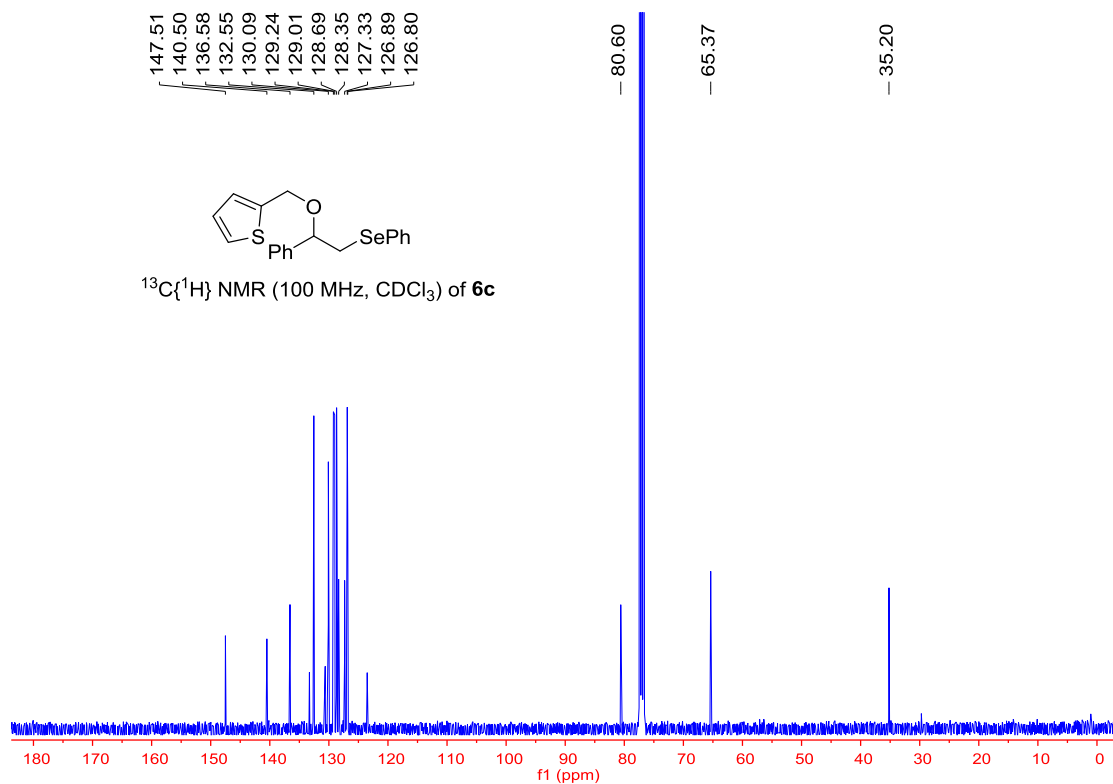

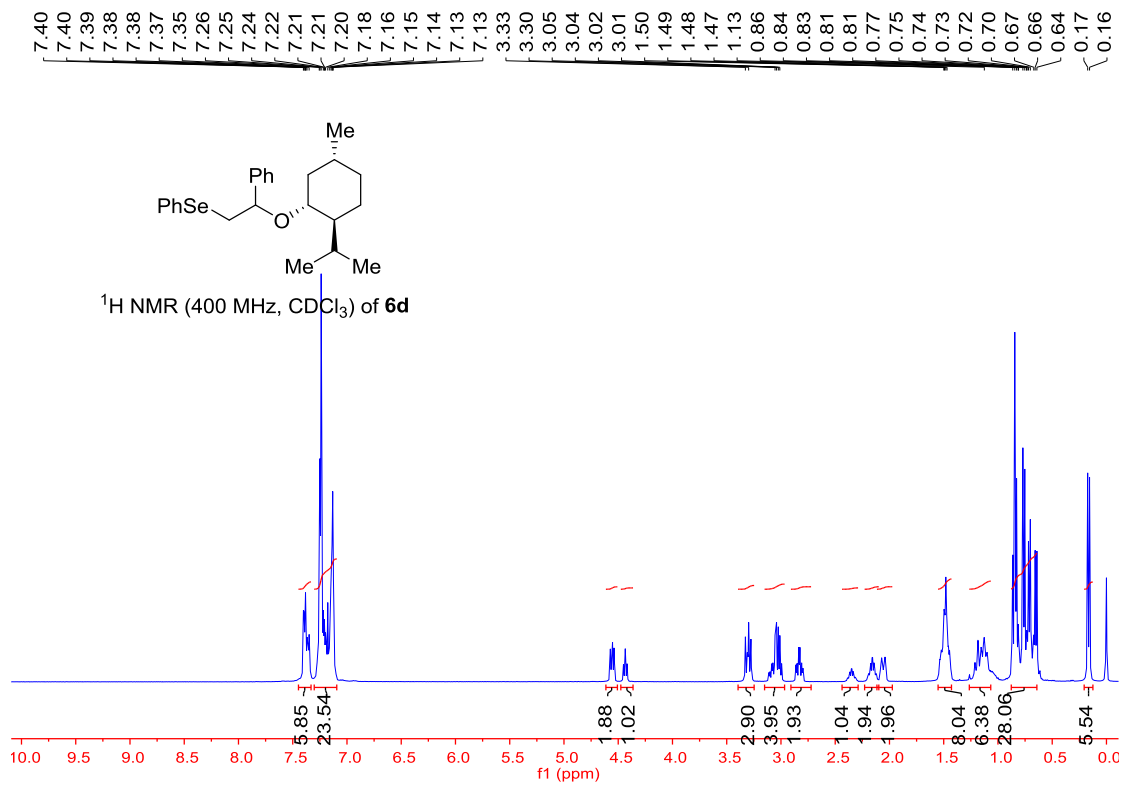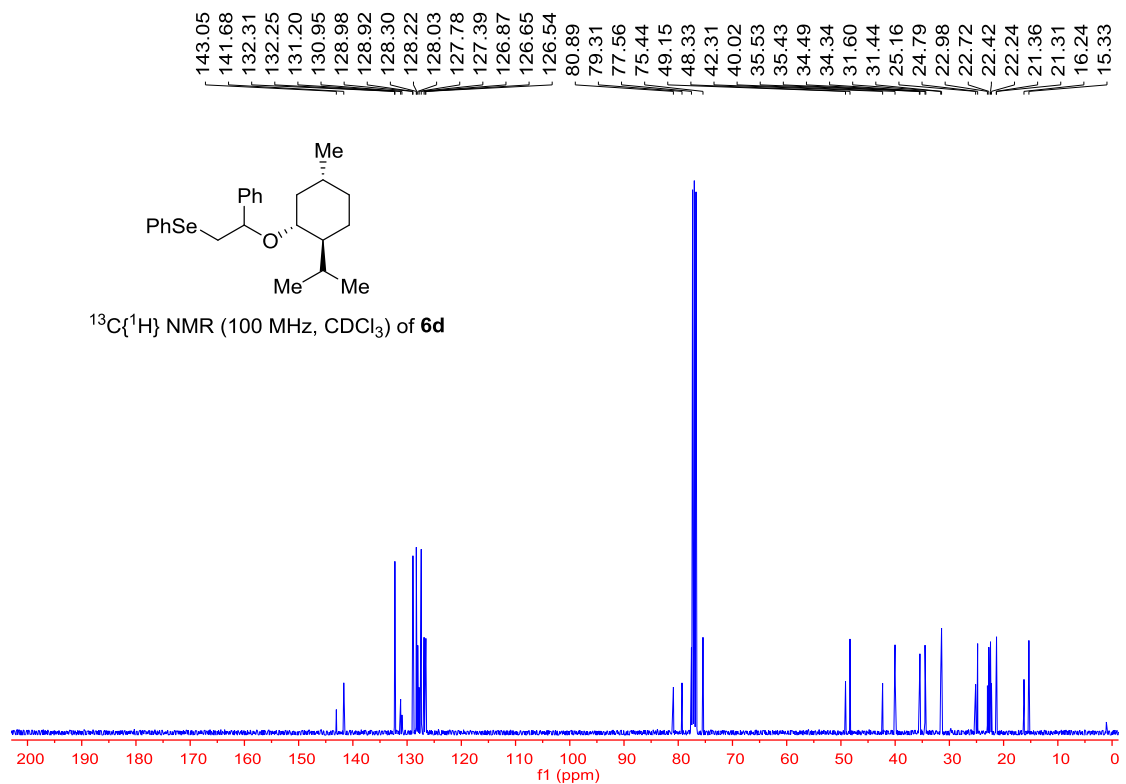

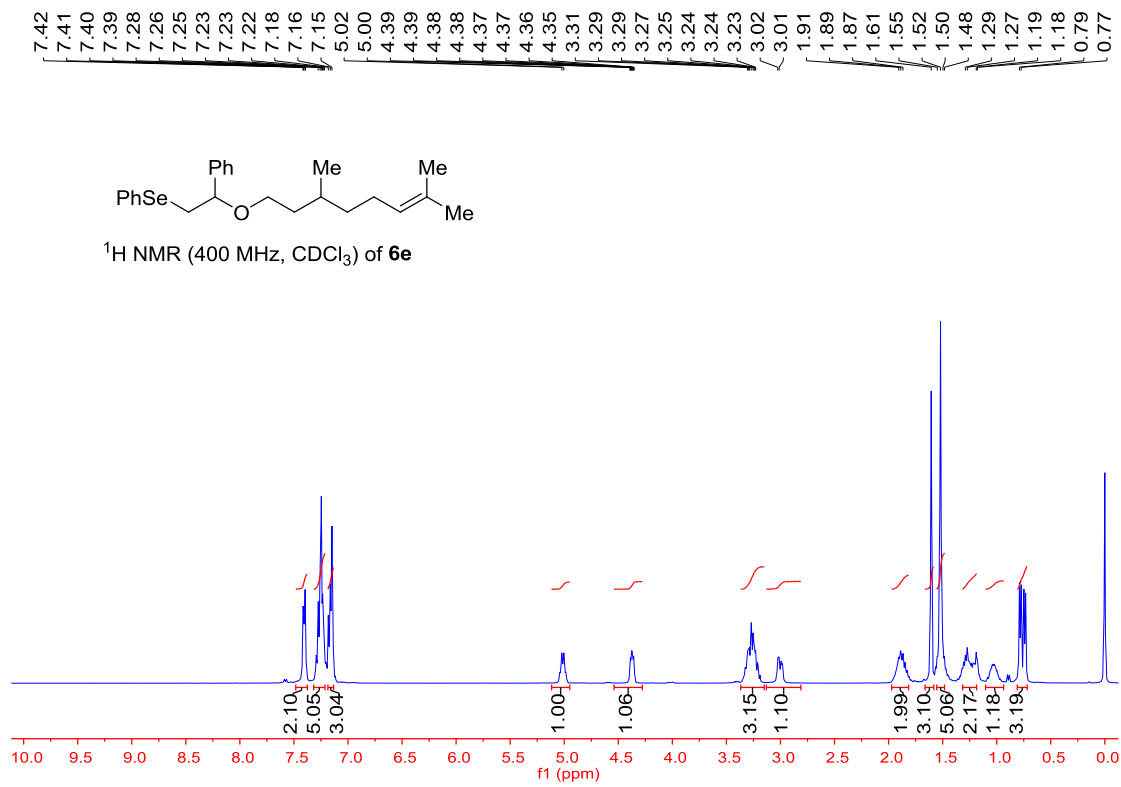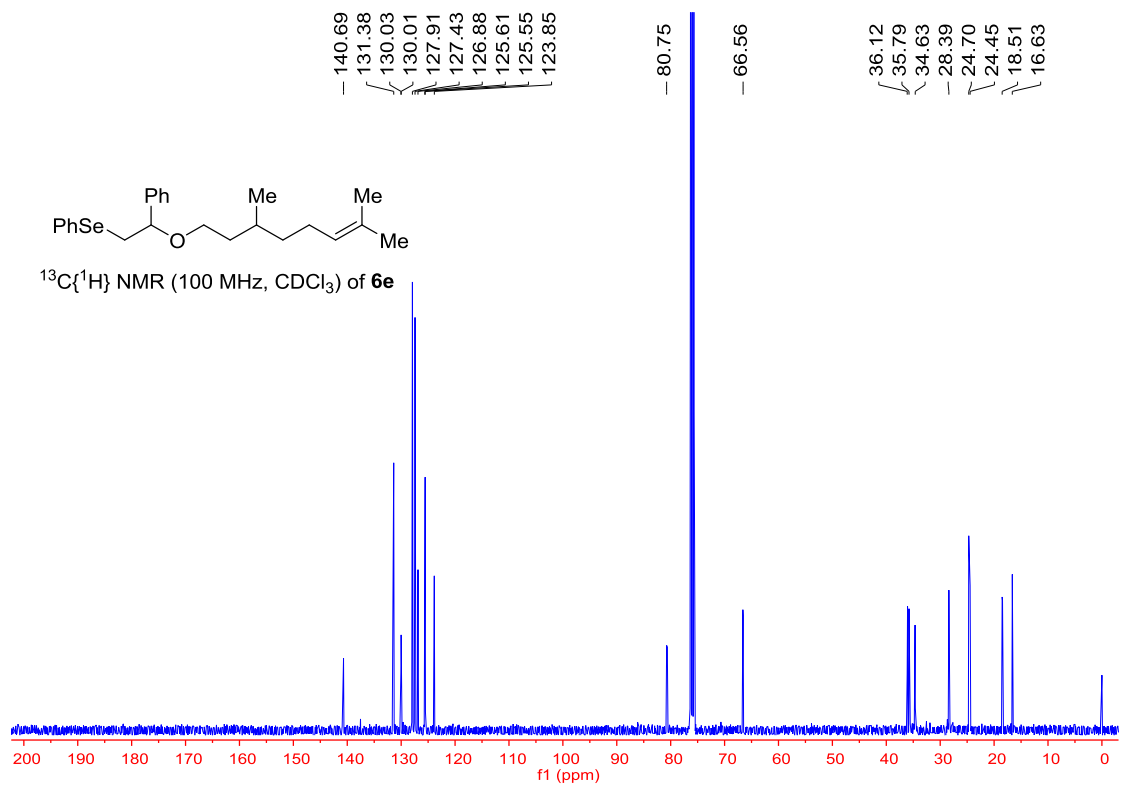

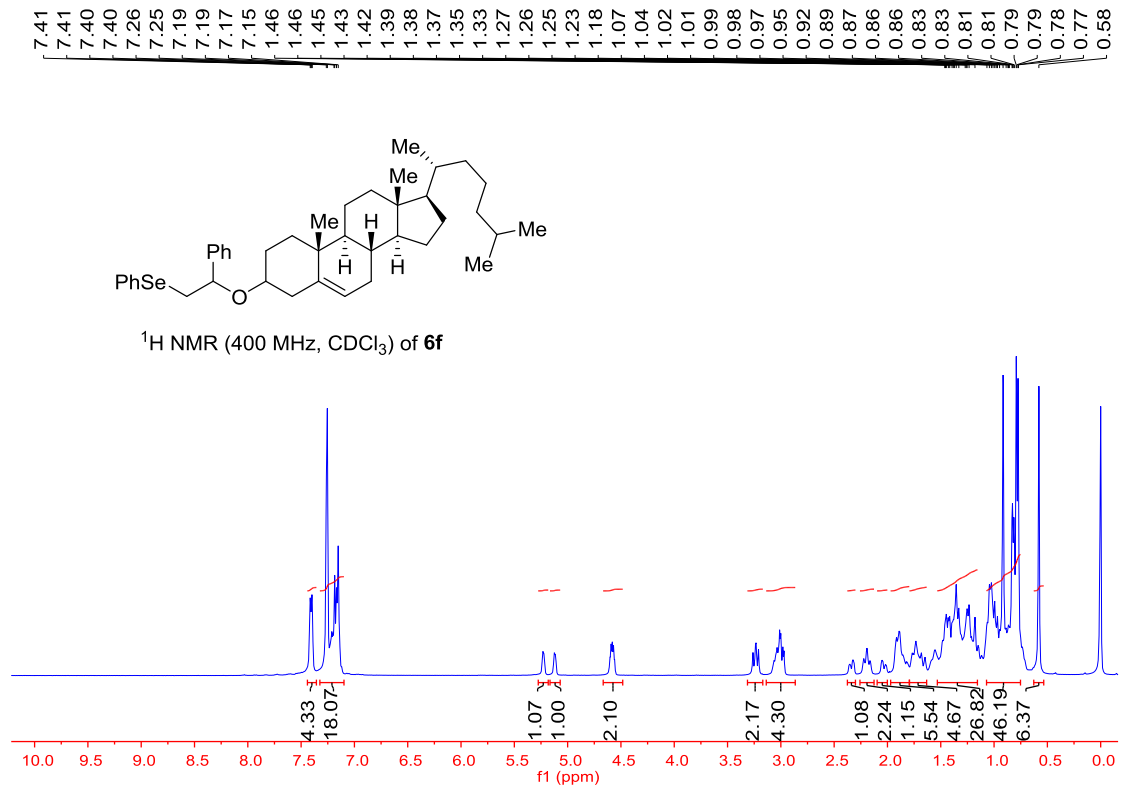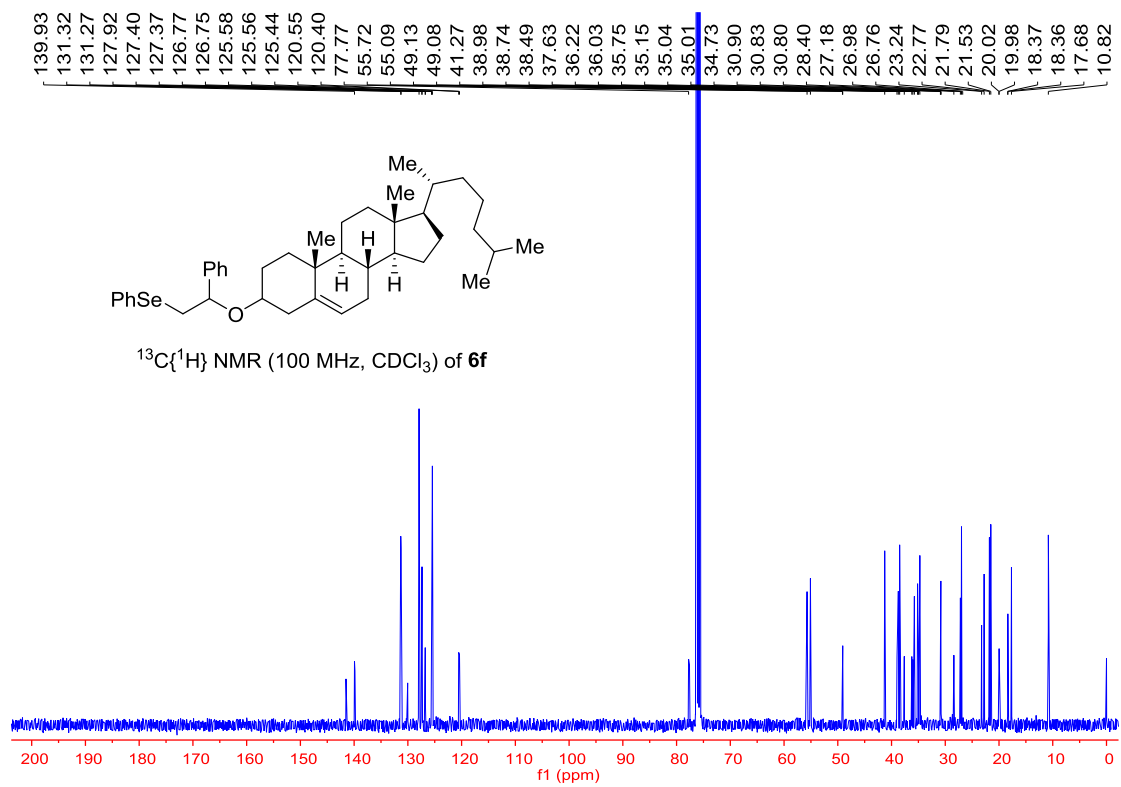

7.48  
7.47  
7.47  
7.46  
7.45  
7.26  
7.25  
7.23  
7.22  
7.22  
7.21  
7.20  
7.19  
7.19  
7.18  
7.17

4.68  
4.67  
4.66  
4.65

3.24  
3.23  
3.21  
3.20  
3.08  
3.06  
3.05  
3.03  
2.75

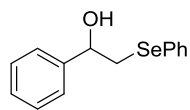

$^1\text{H}$  NMR (400 MHz,  $\text{CDCl}_3$ ) of **7a**

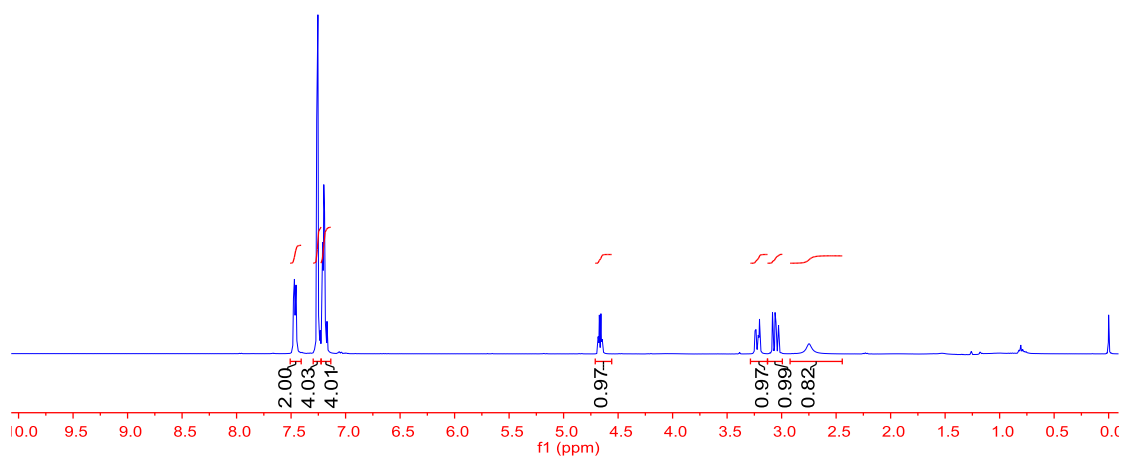

141.4  
132.1  
128.2  
128.1  
127.5  
126.9  
126.4  
124.8

71.2

37.4

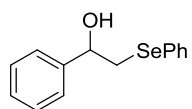

$^{13}\text{C}\{^1\text{H}\}$  NMR (100 MHz,  $\text{CDCl}_3$ ) of **7a**

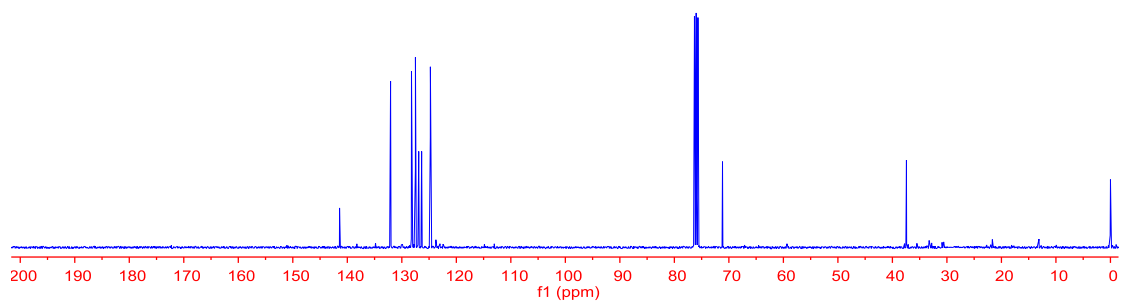

7.46  
7.45  
7.45  
7.45  
7.44  
7.44  
7.19  
7.18  
7.18  
7.17  
7.15  
7.13  
7.12  
7.06  
7.04

4.65  
4.64  
4.63  
4.62  
4.62  
4.61

3.21  
3.20  
3.17  
3.17  
3.08  
3.07  
3.05  
3.05  
3.04  
3.04  
3.02  
3.02  
2.78  
2.77  
2.75  
2.74  
2.73  
2.25  
2.25

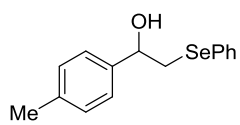

$^1\text{H}$  NMR (400 MHz,  $\text{CDCl}_3$ ) of **7b**

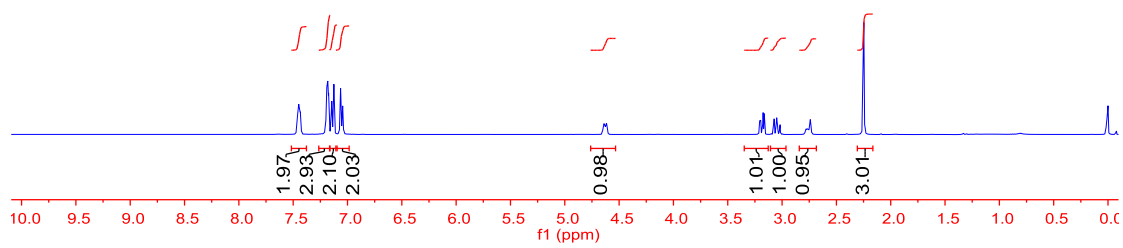

138.5  
136.6  
132.0  
128.2  
128.2  
128.1  
126.2  
124.7

-71.0

-37.3

-20.1

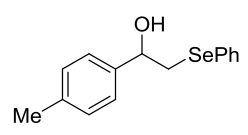

$^{13}\text{C}\{^1\text{H}\}$  NMR (100 MHz,  $\text{CDCl}_3$ ) of **7b**

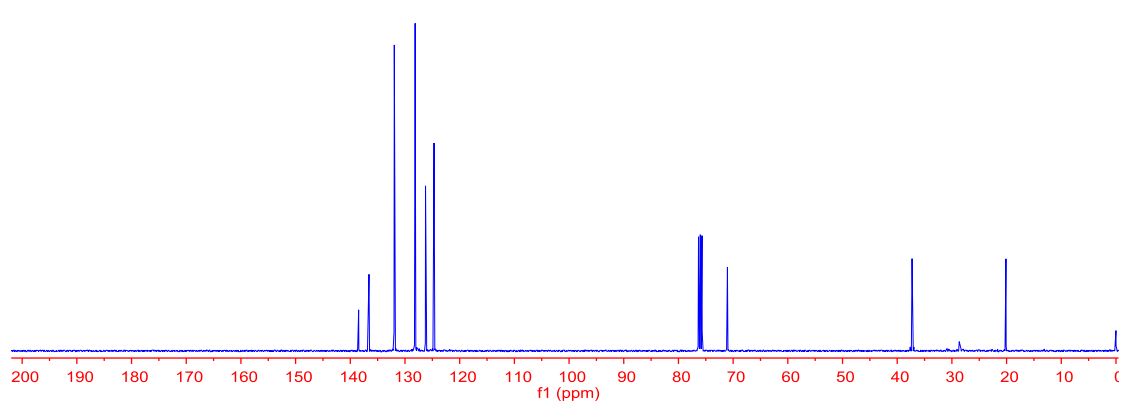

7.45  
7.44  
7.44  
7.43  
7.43  
7.42  
7.21  
7.20  
7.19  
7.19  
7.17  
7.16  
7.14

4.62  
4.62  
4.61  
4.60  
4.59  
4.58  
3.18  
3.17  
3.15  
3.14  
3.01  
2.98  
2.98  
2.95  
2.88  
2.87

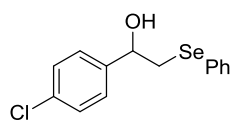

$^1\text{H}$  NMR (400 MHz,  $\text{CDCl}_3$ ) of **7c**

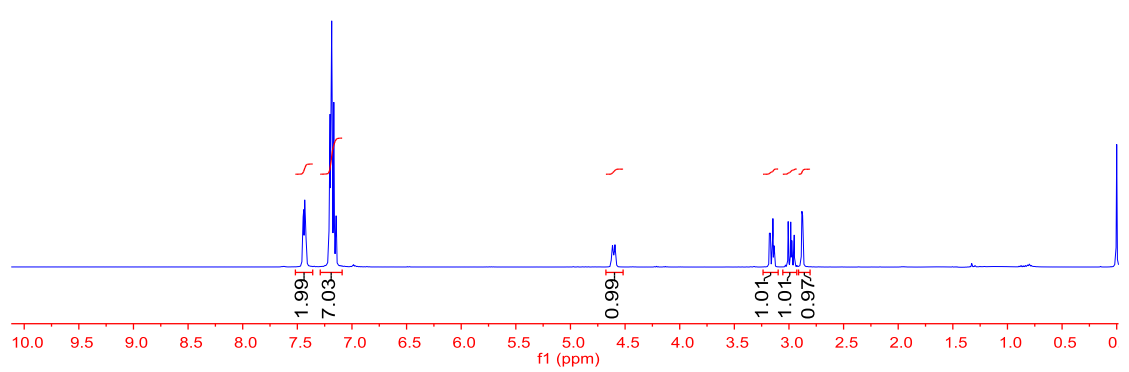

139.8  
132.5  
132.2  
128.3  
127.8  
127.6  
126.5  
126.2

-70.4

-37.3

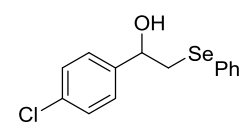

$^{13}\text{C}\{^1\text{H}\}$  NMR (100 MHz,  $\text{CDCl}_3$ ) of **7c**

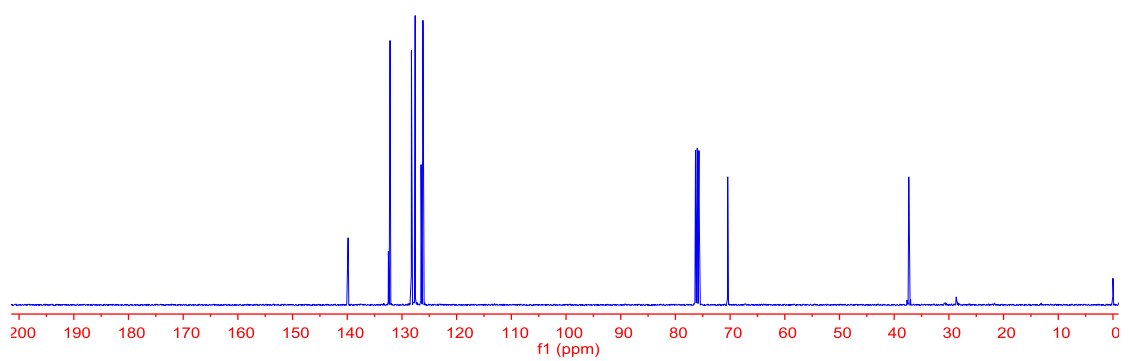

7.47  
7.45  
7.43  
7.43  
7.42  
7.42  
7.41  
7.33  
7.31  
7.19  
7.18  
7.17

4.69  
4.68  
4.67  
4.67  
4.66  
4.65

3.20  
3.19  
3.17  
3.16  
3.01  
3.00  
3.00  
2.99  
2.98  
2.96

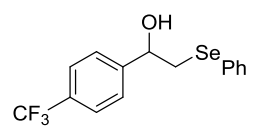

<sup>1</sup>H NMR (400 MHz, CDCl<sub>3</sub>) of **7d**

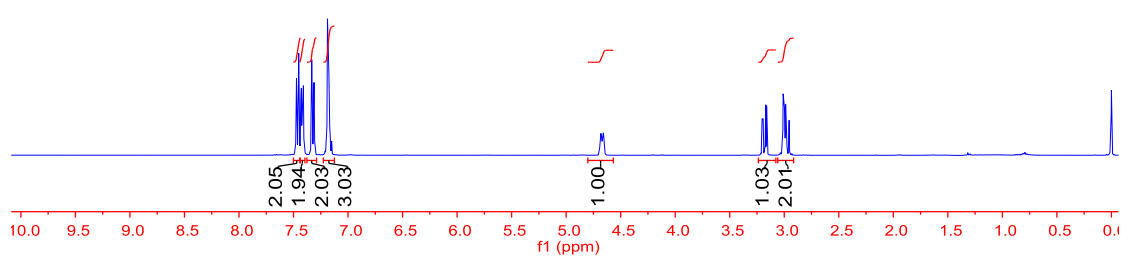

145.3  
132.3  
129.4  
129.1  
128.8  
128.4  
128.3  
127.6  
126.6  
125.1  
124.4  
124.4  
124.4  
124.3  
121.7  
119.0

-70.5

-37.3

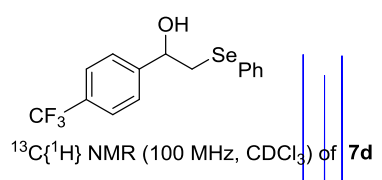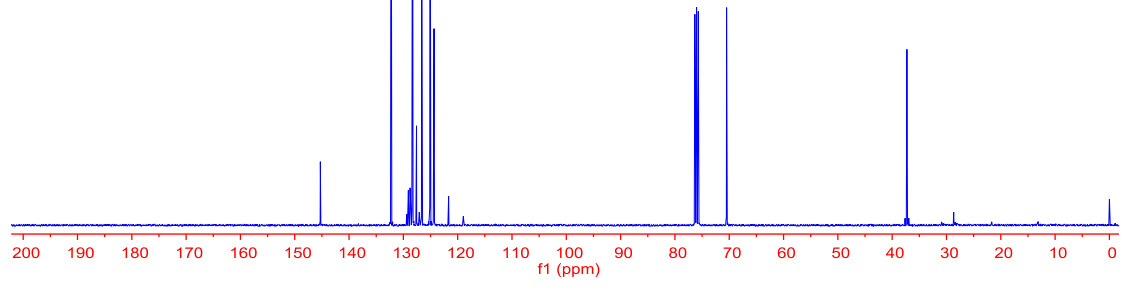



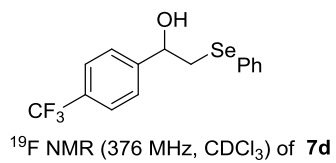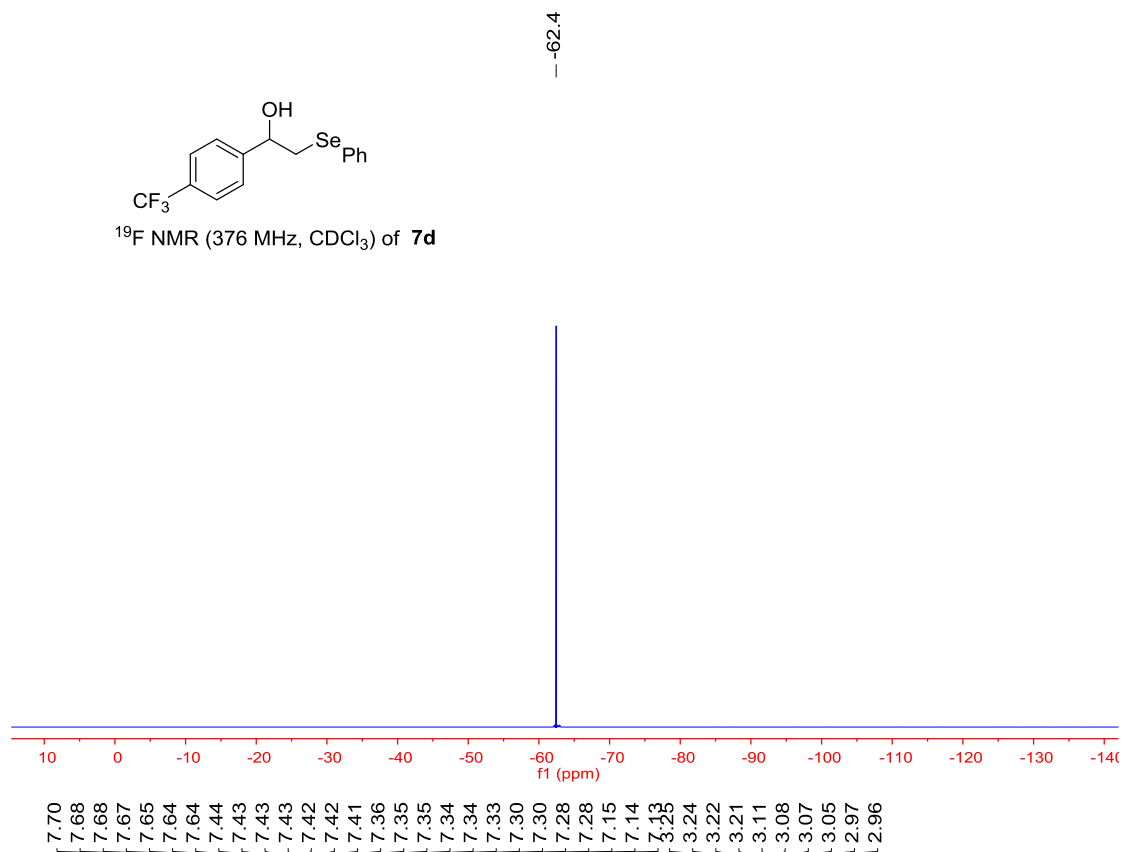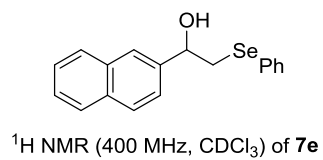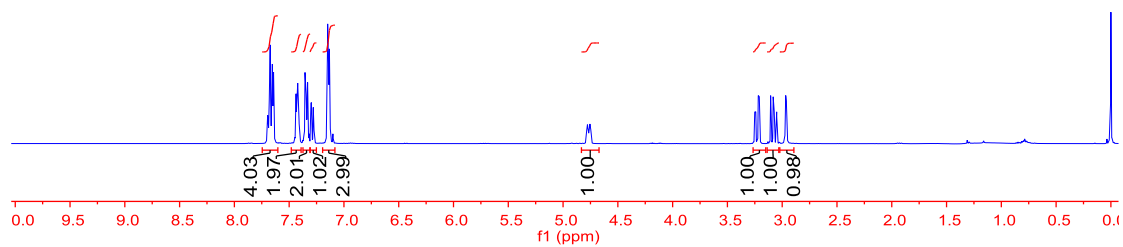

138.8  
132.1  
132.0  
132.0  
128.2  
128.1  
127.3  
126.9  
126.6  
126.3  
125.1  
124.9  
123.6  
122.7

- 71.2

- 37.2

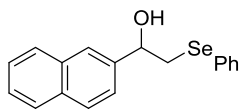

$^{13}\text{C}\{^1\text{H}\}$  NMR (100 MHz,  $\text{CDCl}_3$ ) of **7e**

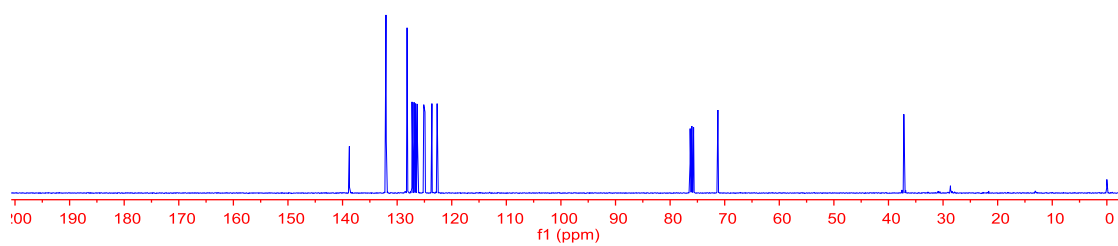

7.46  
7.45  
7.45  
7.45  
7.44  
7.44  
7.44  
7.43  
7.43  
7.19  
7.18  
7.18  
7.18  
7.17  
7.17  
7.16  
7.15  
7.14  
7.14  
7.13  
6.86  
6.86  
6.85  
6.85  
4.91  
3.28  
3.27  
3.25  
3.24  
3.19  
3.17  
3.16  
3.14  
2.99  
2.98

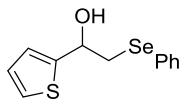

$^1\text{H}$  NMR (400 MHz,  $\text{CDCl}_3$ ) of **7f**

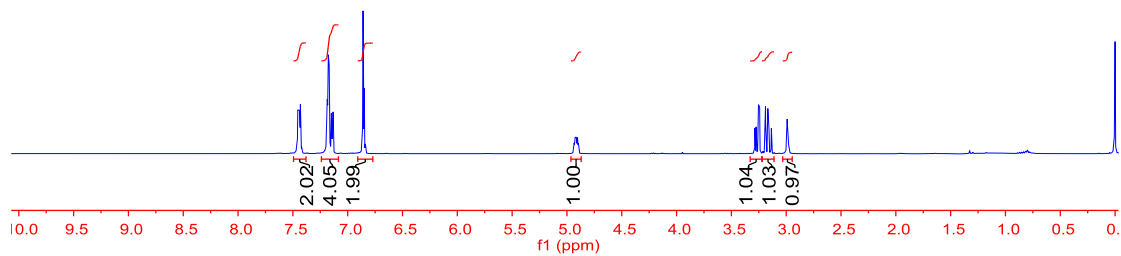

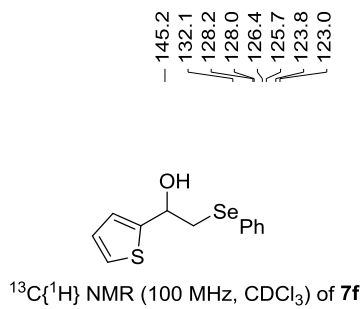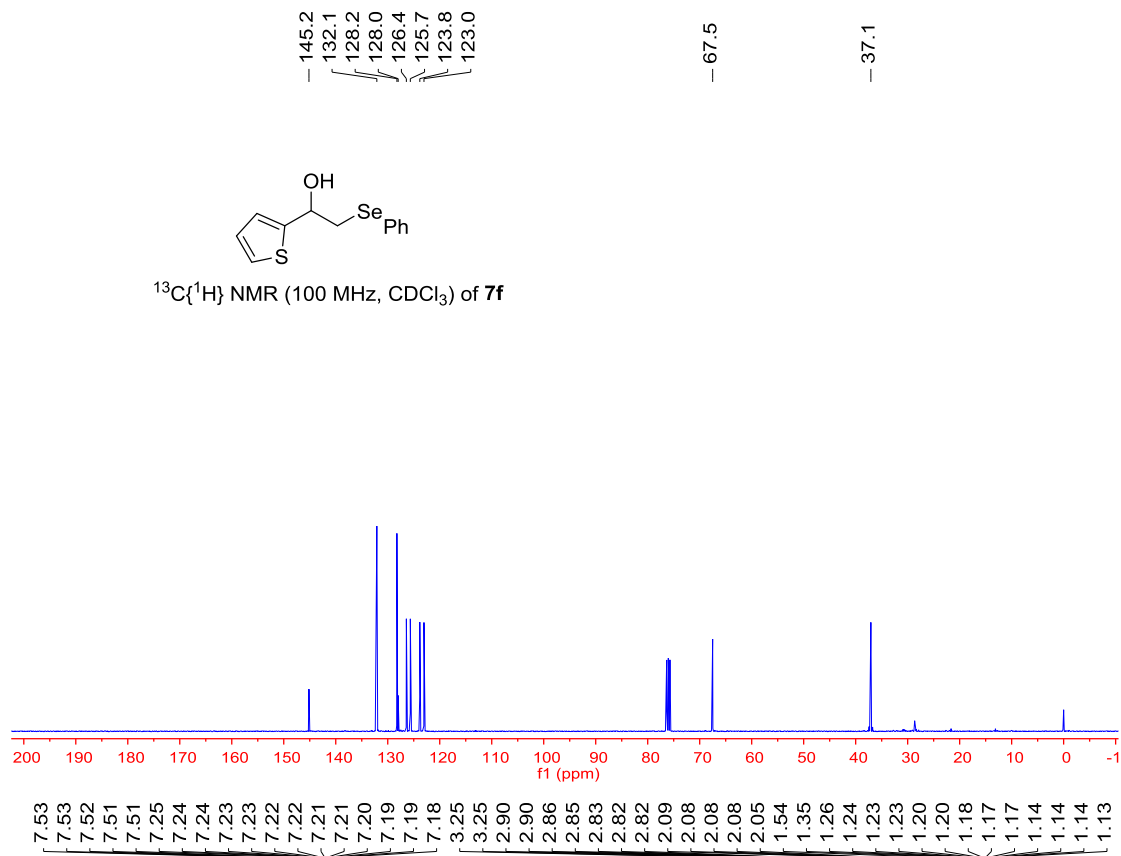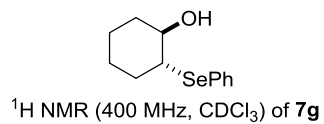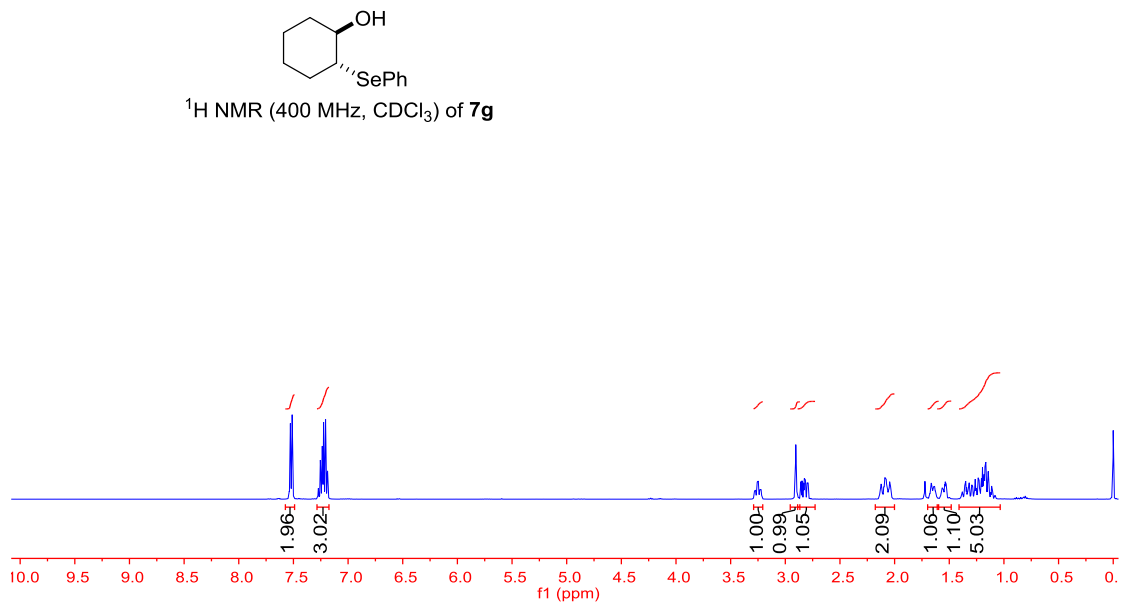

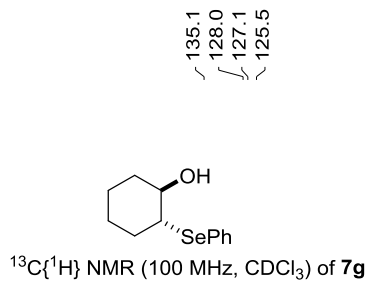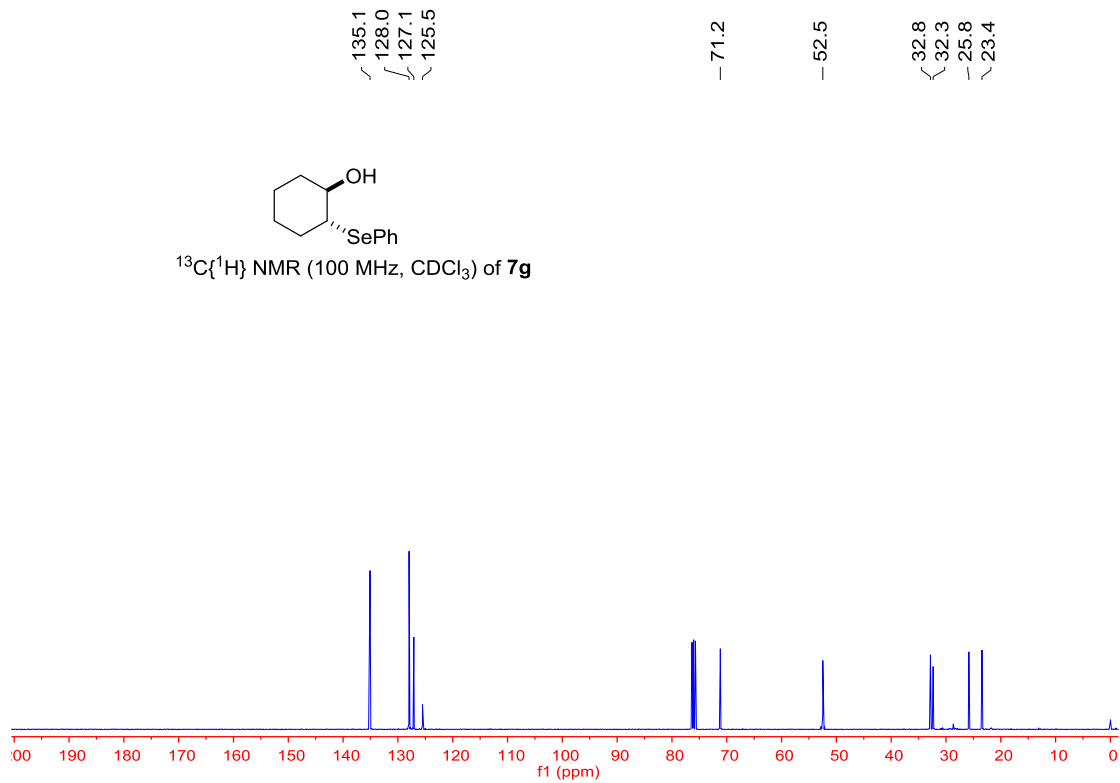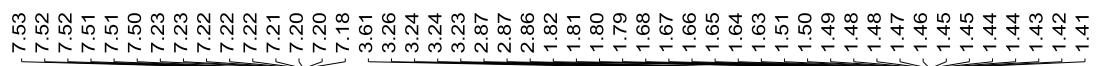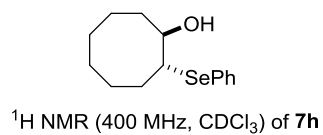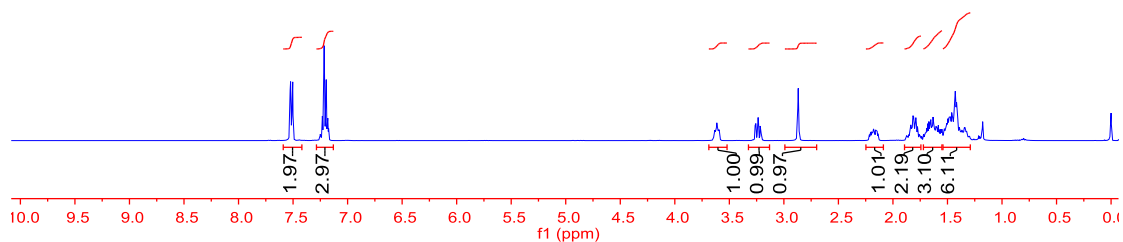

- 182.3

134.4  
134.4  
128.0  
126.9  
126.8

- 72.5

- 54.2

30.9  
30.6  
25.8  
25.7  
24.2  
22.6

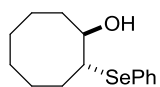

$^{13}\text{C}\{^1\text{H}\}$  NMR (100 MHz,  $\text{CDCl}_3$ ) of **7h**

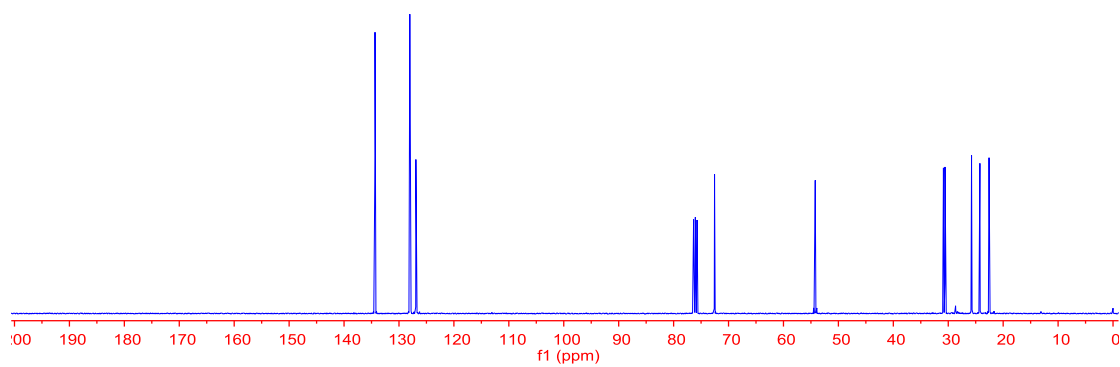

Supplement: d4ra04266b1.pdf [file d4ra04266b1.pdf]
